# Supplementary material
Source: PubMed Central journal article supplement (PMC4339225)
Supplement: NIHMS657054-supplement-1.pdf [file NIHMS657054-supplement-1.pdf]

**Supplementary Figure 1.** Inverse correlation between MeDIP-seq and MRE-seq signals: (a) sperm, (b) 2.5 hpf, (c) 3.5 hpf, (d) 4.5 hpf, (e) 6 hpf and (f) 24 hpf embryos.

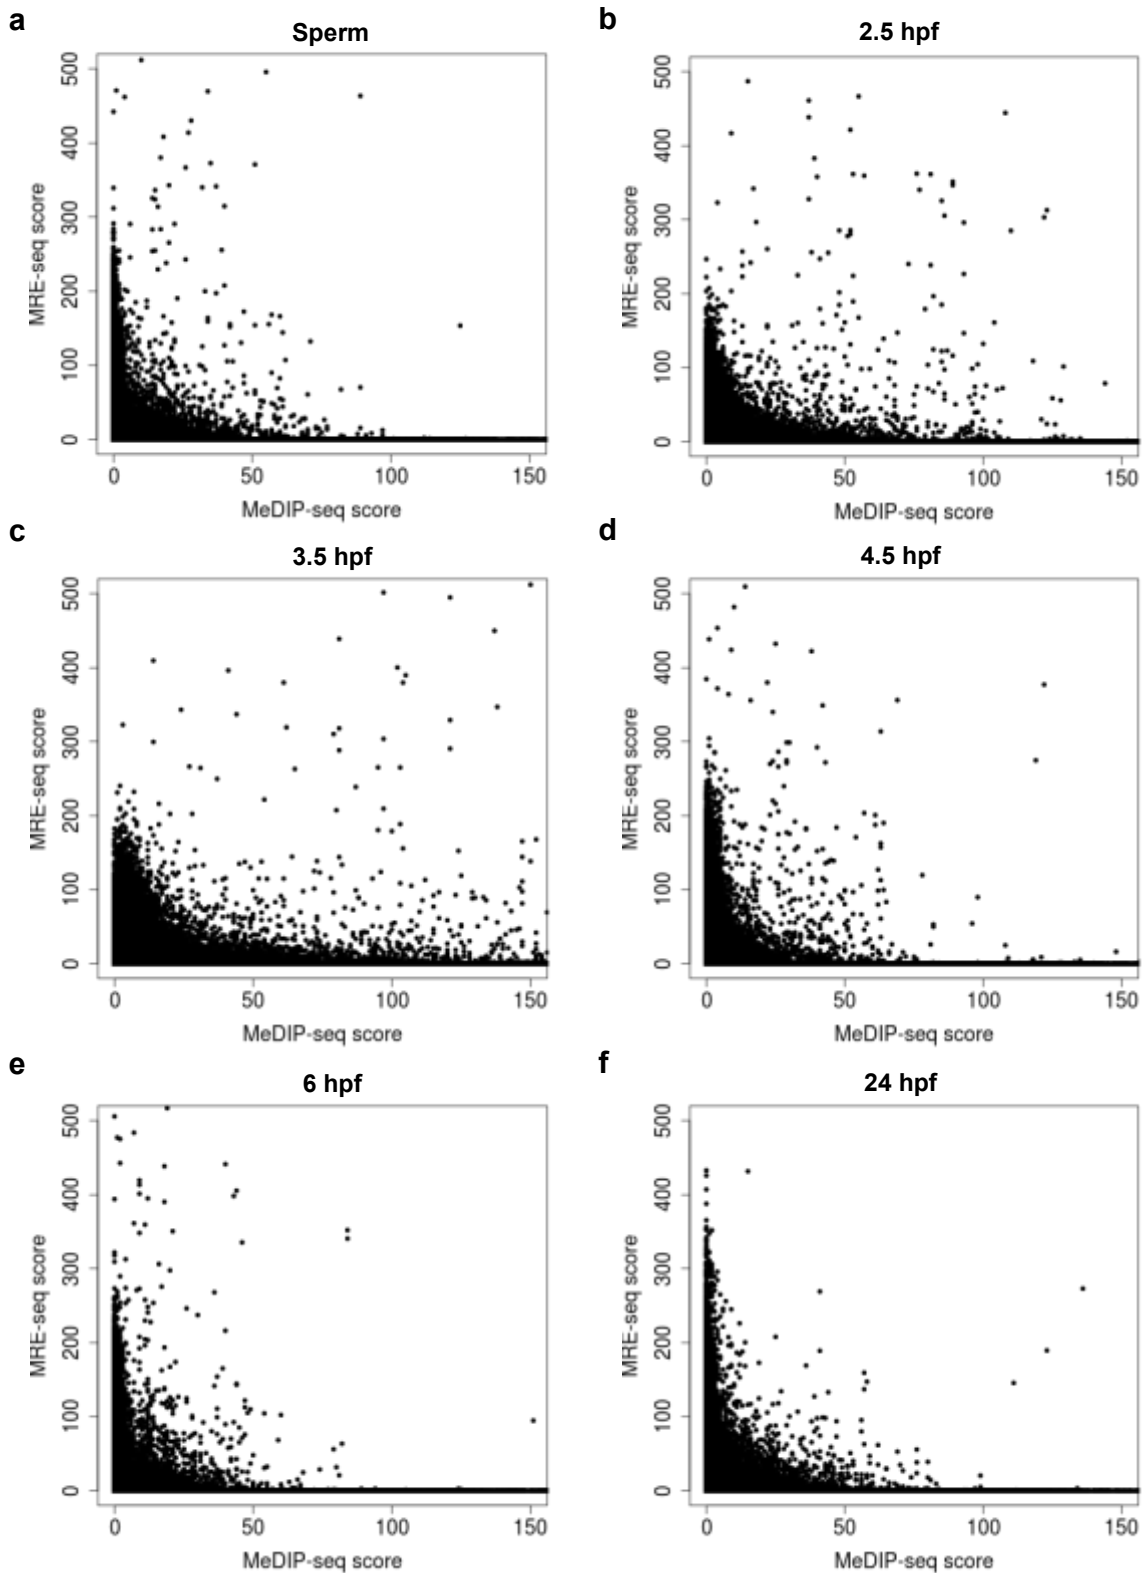

**Supplementary Figure 2.** Epigenome Browser views of all 7 zebrafish *hox* gene clusters: (a) *hoxAa*, (b) *hoxAb*, (c) *hoxBa*, (d) *hoxBb*, (e) *hoxCb*, (f) *hoxCa* and (g) *hoxDa*. The *hox* genes encode transcription factors that are important in development. All of the *hox* gene clusters are hypomethylated in all 6 developmental stages, and the neighboring regions of the clusters are mostly methylated. MeDIP-seq libraries and MRE-seq libraries covered largely non-overlapping regions.

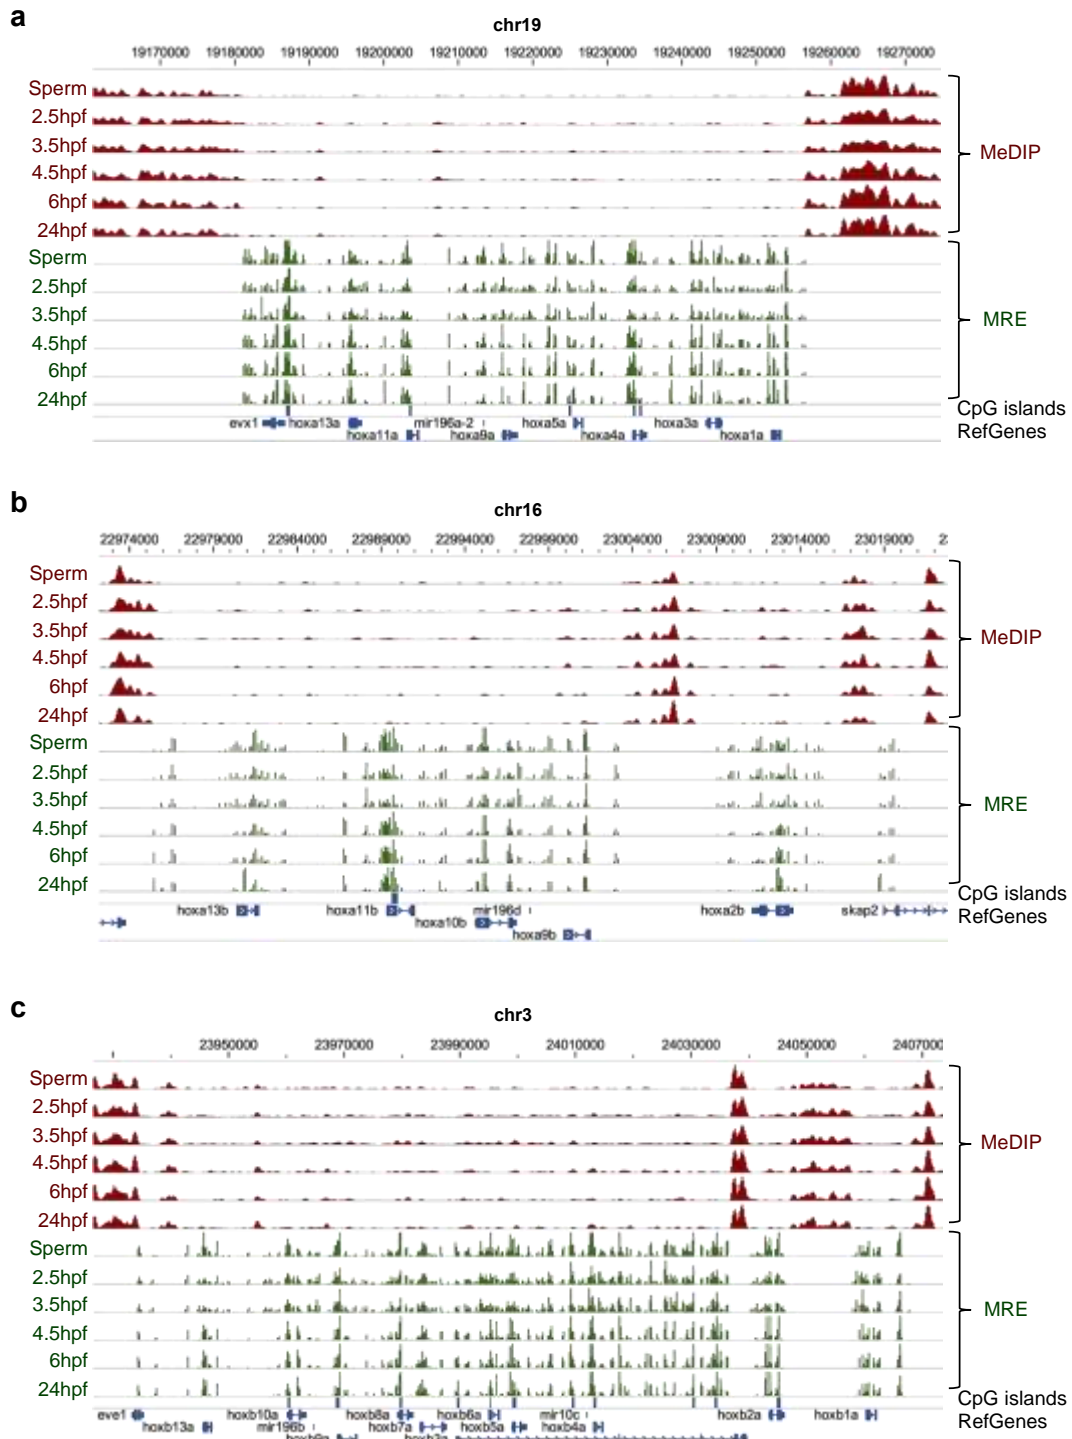

Supplementary Figure 2. Continued.

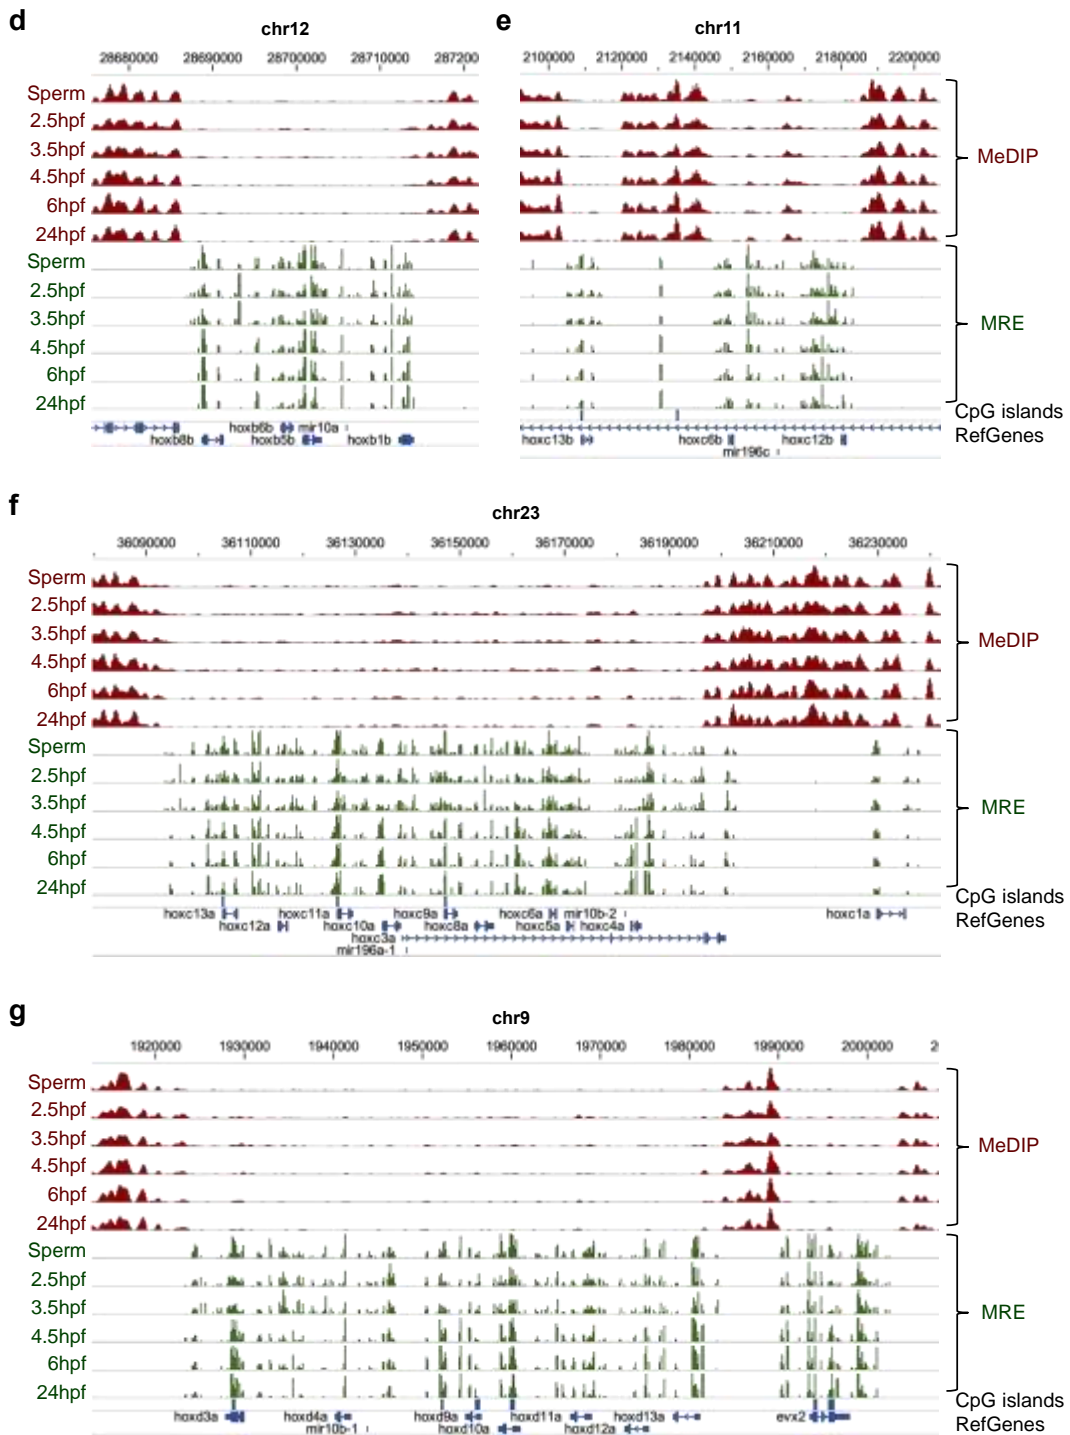

**Supplementary Figure 3.** Concordance between methylCRF and MethyIC-seq predictions. **(a)** Density plots comparing methylCRF and MethyIC-seq methylation levels at each CpG. CpGs without MethyIC-seq predictions were excluded from each comparison. The concordances calculated based on 0.25 and 0.1 window differences were displayed below each density plot. **(b)** The histogram of CpGs with differences between methylCRF and MethyIC-seq predictions. In each comparison, more than 90% CpGs had differences smaller than 0.25 between methylCRF and MethyIC-seq.

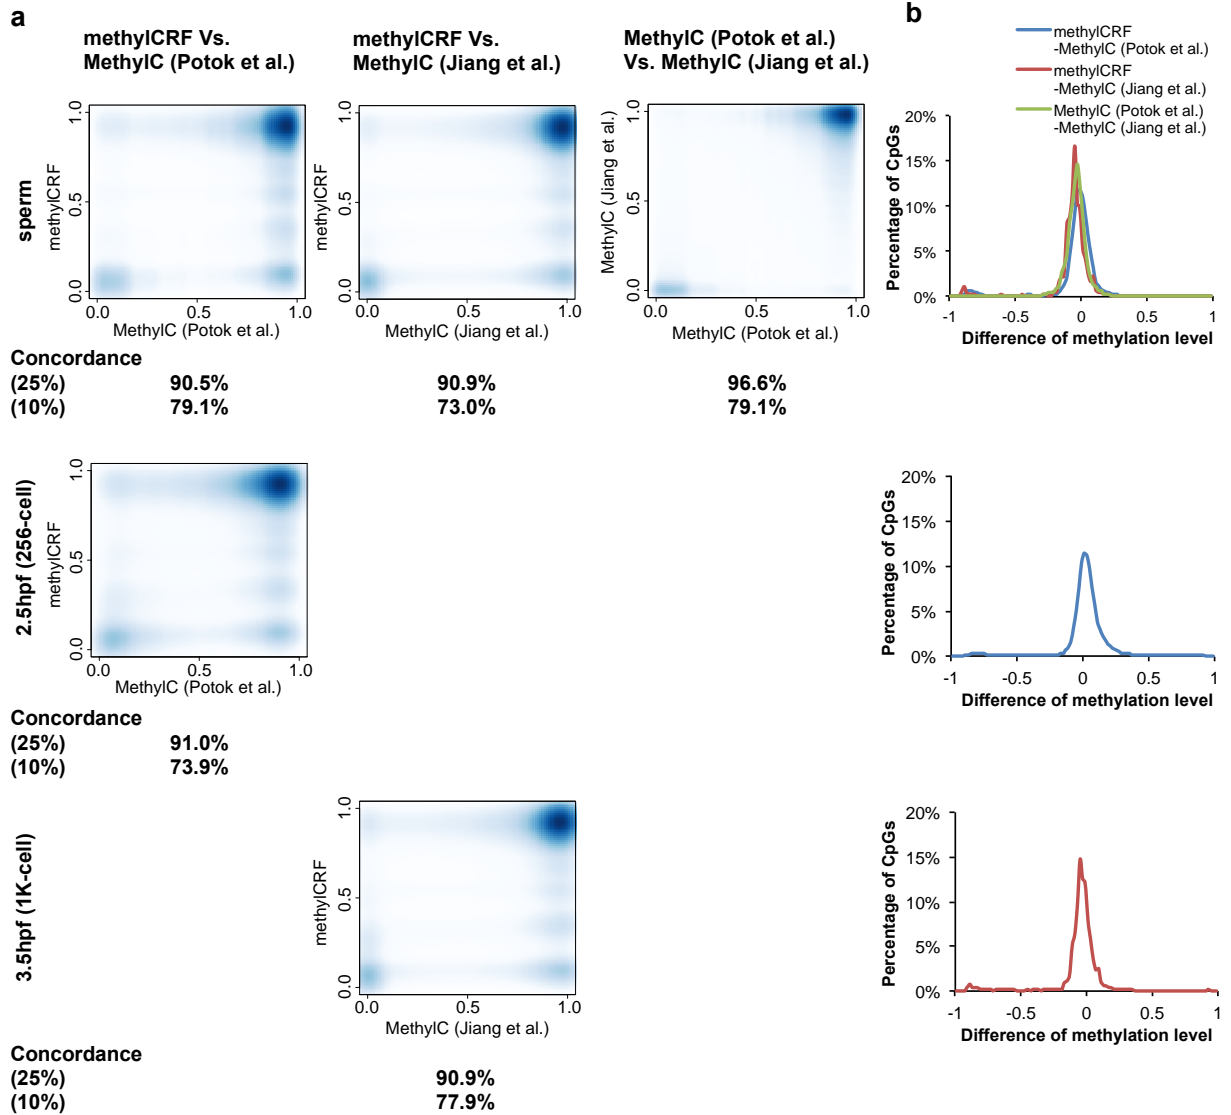

**Supplementary Figure 4.** The read depth of MethylC-seq affects the concordance between MethylC-seq and methylCRF. **(a)** The histograms of CpG read depths in the sperm MethylC-seq library from Potok et al. A large fraction of CpGs were not covered or only covered by a few reads (10,050,087 CpGs had < 5 reads). Grey bars indicate CpGs that are also shown in **(b)**. **(b)** Concordance between MethylC-seq and methylCRF (right y-axis) as a function of MethylC-seq read depth cutoff. Concordance between MethylC-seq and methylCRF significantly increased with increasing sequencing depth cutoff of MethylC-seq.

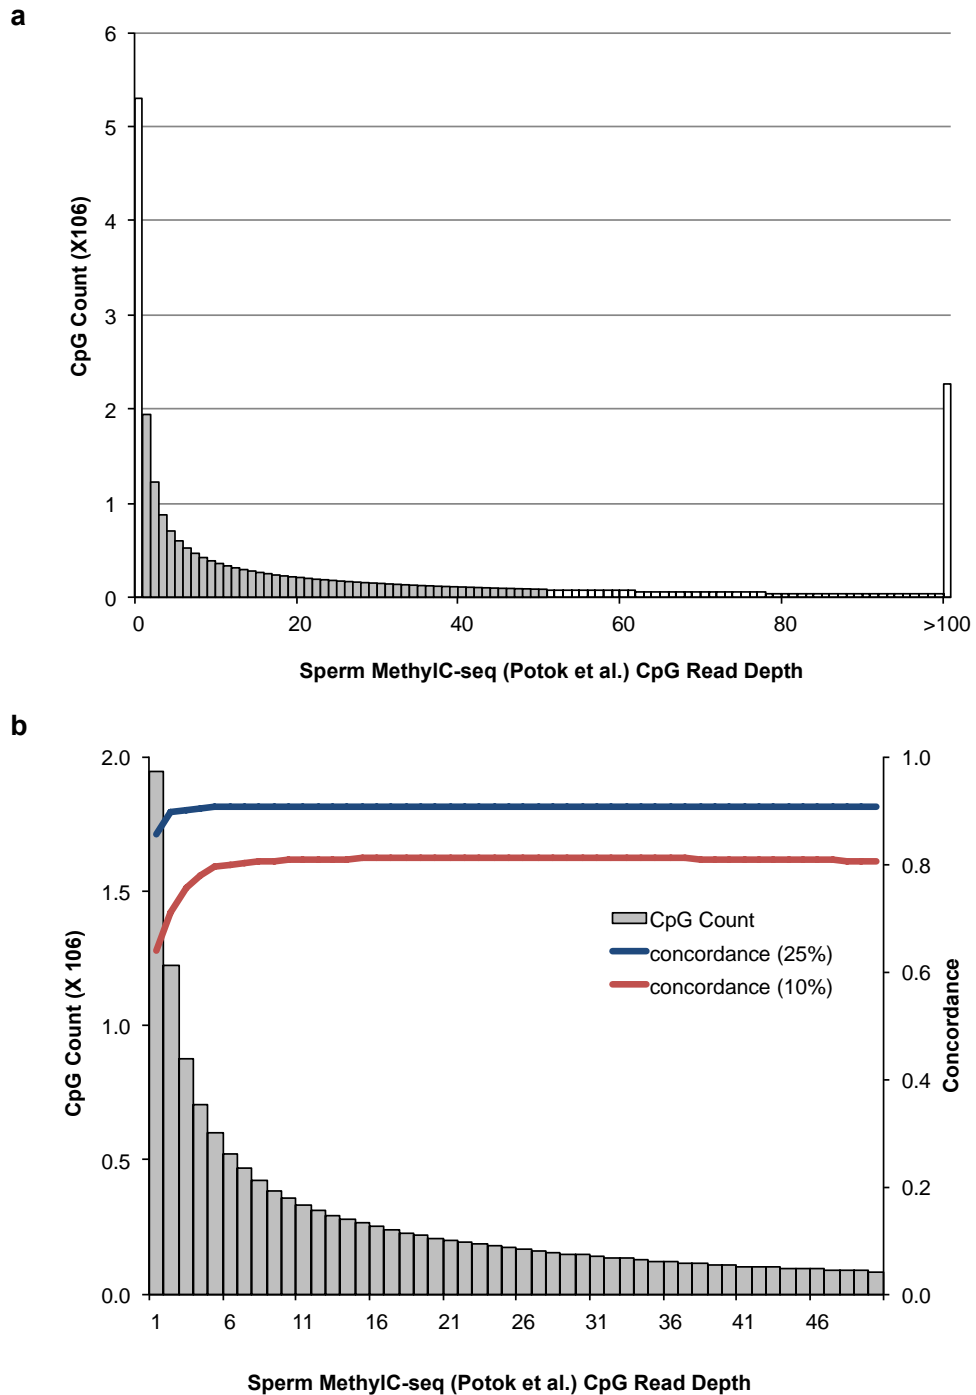

**Supplementary Figure 5.** Experimental validation of regions that exhibited discordance between MethylC-seq (Potok et al.) and methylCRF of sperm. Eight regions were validated using either clonal sequencing or pyrosequencing from PCR amplicons of bisulfite-treated genomic DNA of sperm. **(a-h)** Comparison of the eight validated regions. Within each panel, the top part is an Epigenome Browser view containing the validated region, directly comparing genomic data (i.e. methylCRF vs MethylC-seq) in and around the validated region. The validated regions are marked by a black bar. The middle part is the validation experiment (either targeted clonal validation, shown as aligned open/closed circles, or pyrosequencing result, shown as a pyrogram). The bottom part is a line graph of methylation levels in validated region, directly comparing methylCRF values, MethylC-seq values, and values from validation experiments. Open circles indicate unmethylated CpG; closed circle, methylated CpG. The asterisk \* indicates absence of CpG site due to a SNP. **(a)** chr1:42015593-42015753 **(b)** chr14:25157201-25157370 **(c)** chr20:39657499-39657620 **(d)** chr22:12335157-12335326 **(e)** chr24:27012514-27012771 **(f)** chr14:20461146-20461441 **(g)** chr21:8582721-8582922 **(h)** chr5:46270017-46270621 **(i)** A table that summarizes the comparison. The root-mean-squared error (RMSE) was calculated between MethylC-seq or methylCRF and targeted experimental validation.

Supplementary Figure 5. Continued.

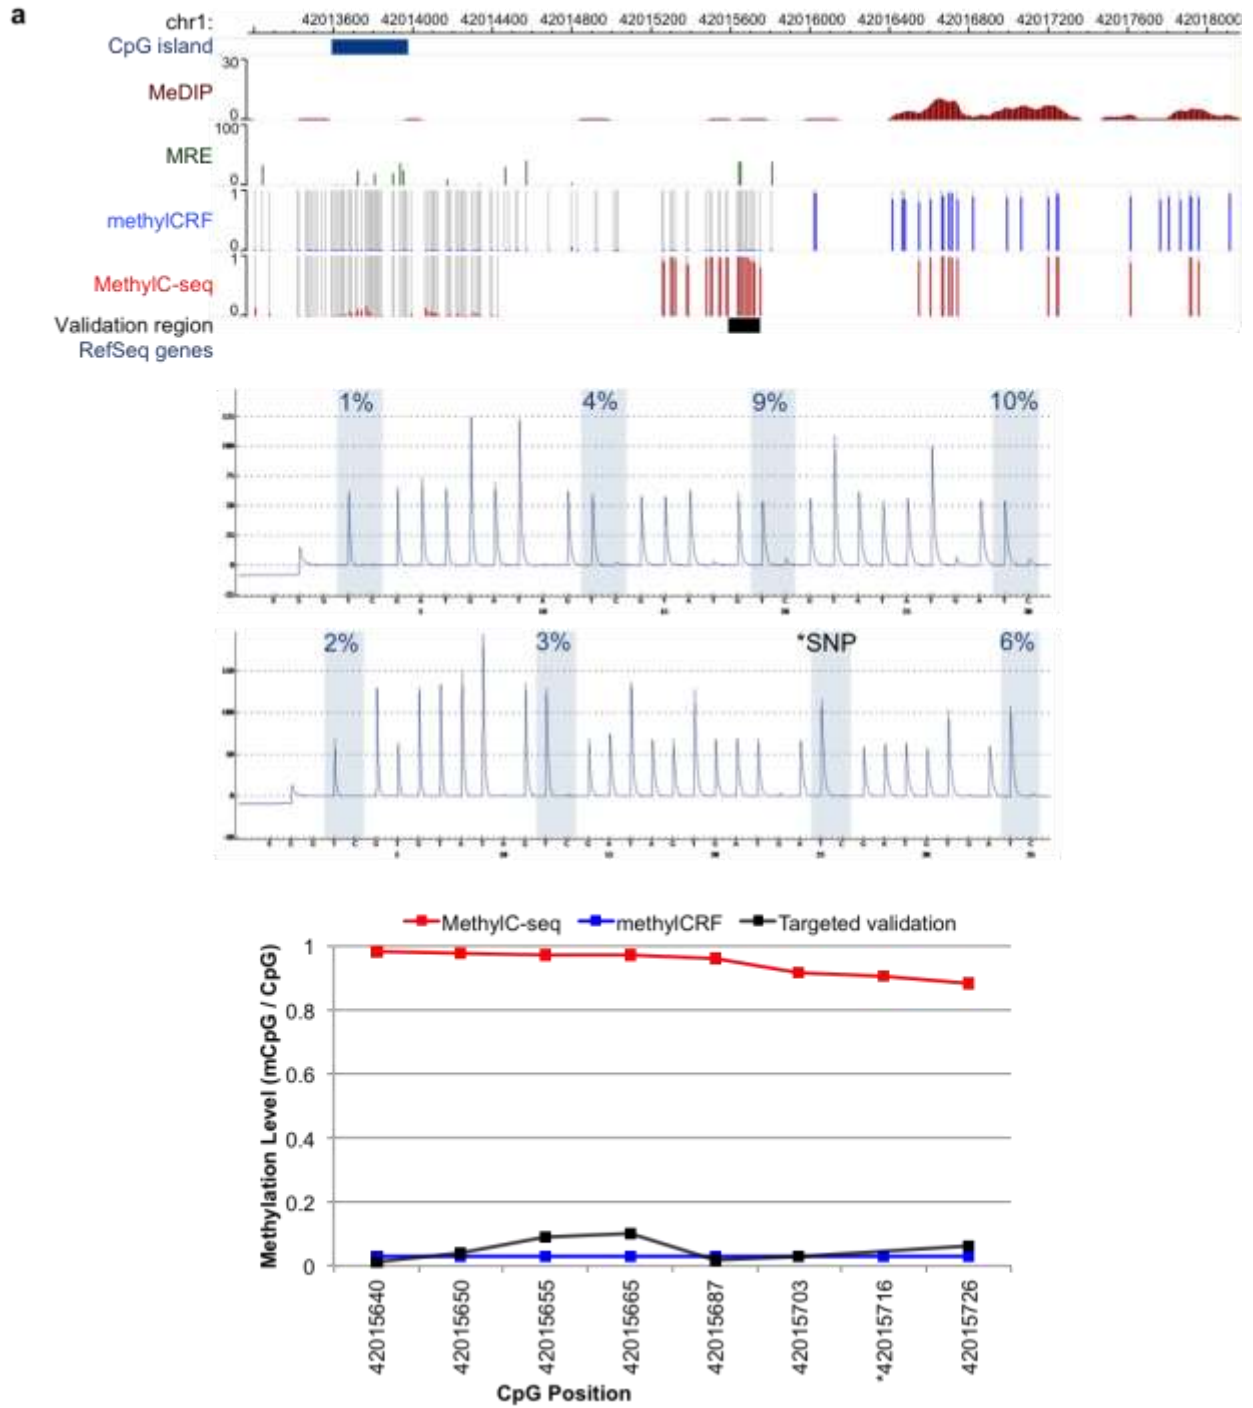

Supplementary Figure 5. Continued.

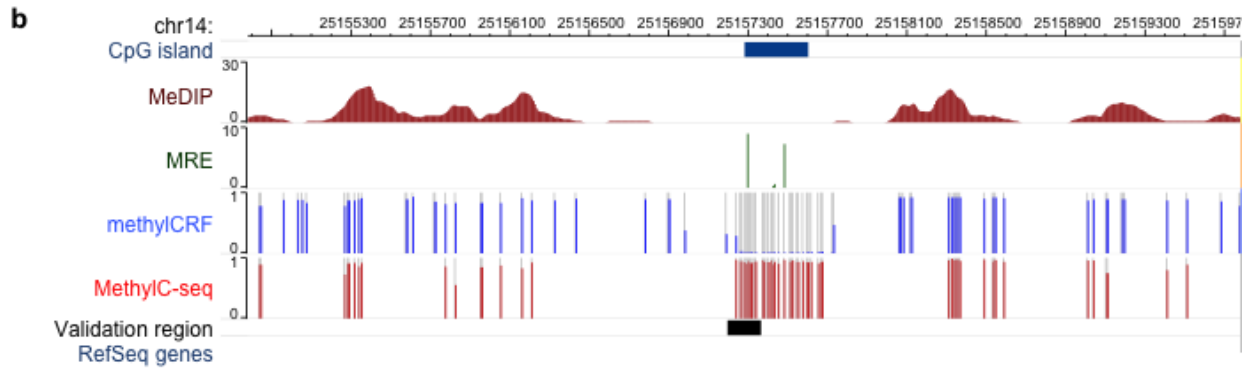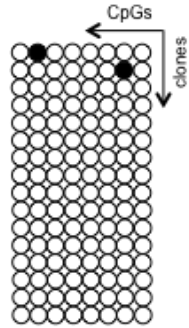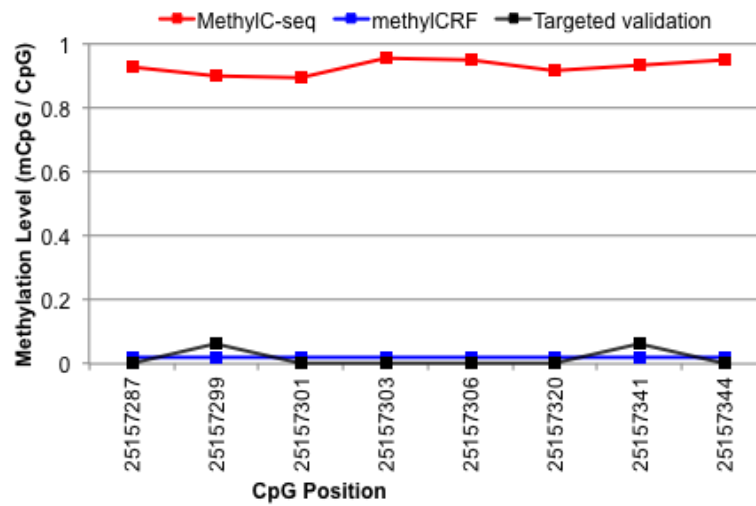



Supplementary Figure 5. Continued.

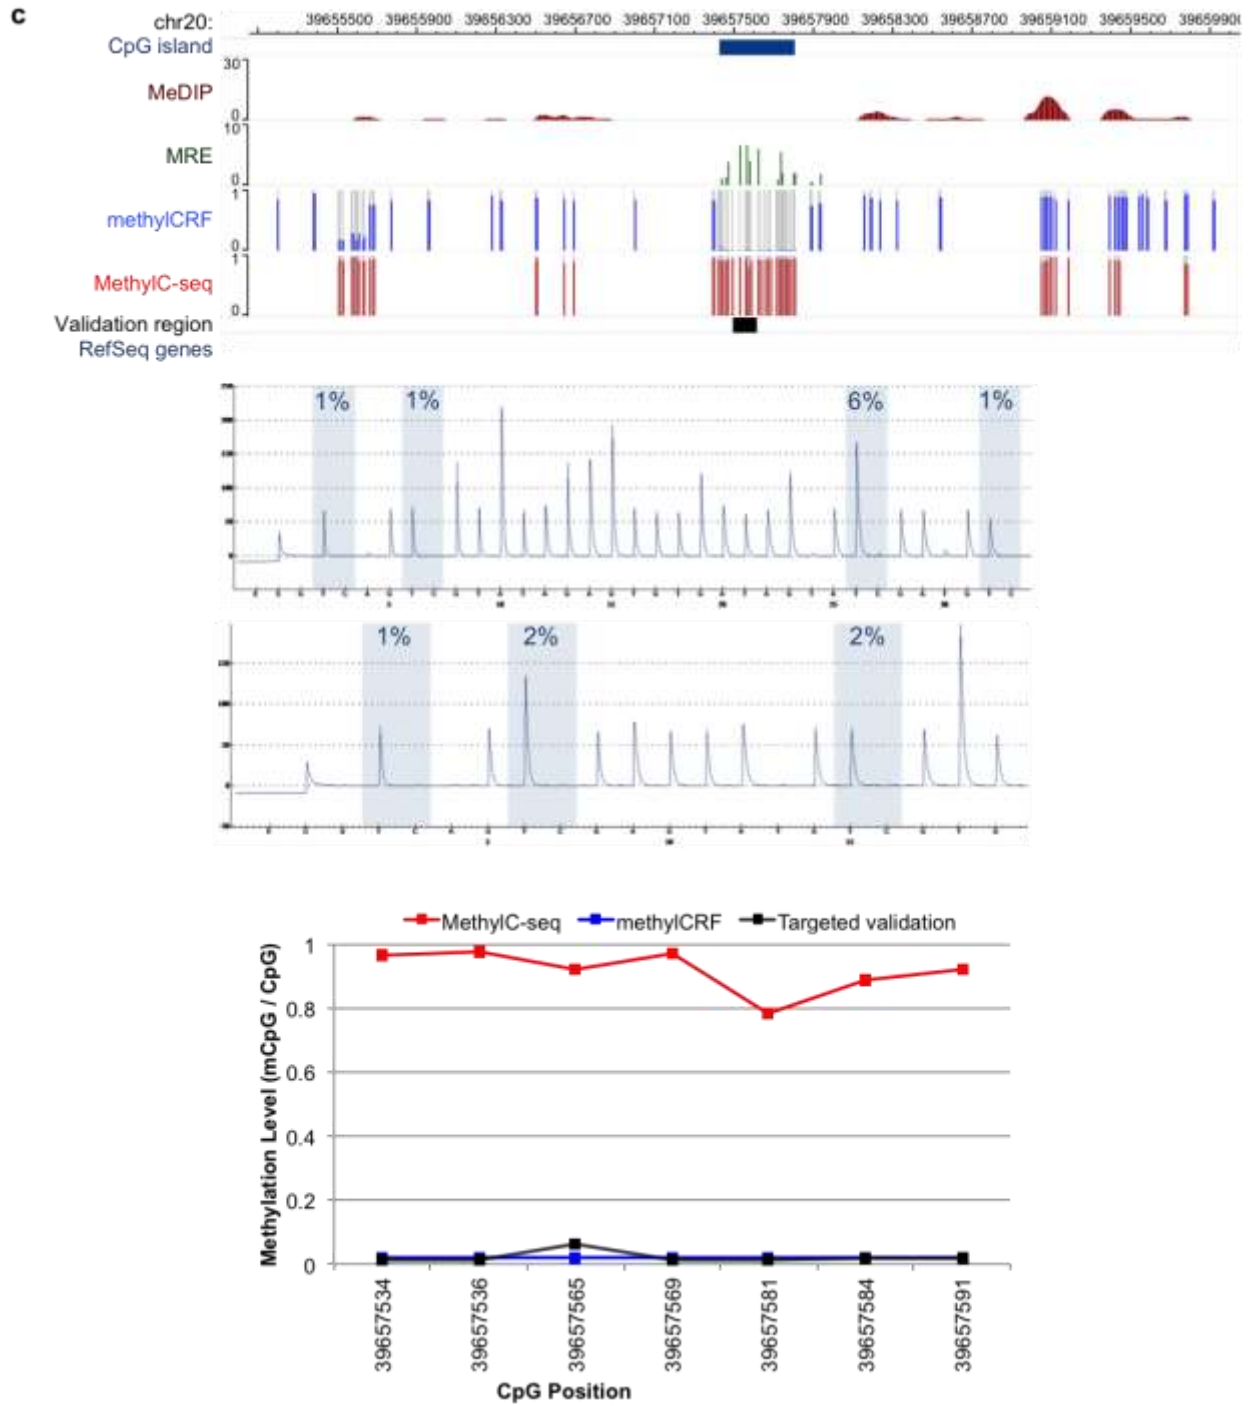

Supplementary Figure 5. Continued.

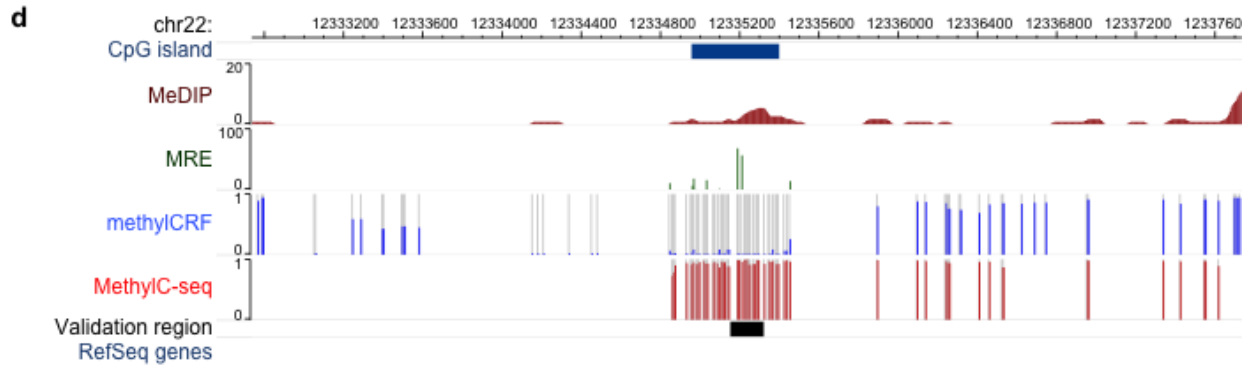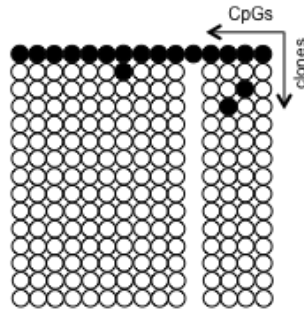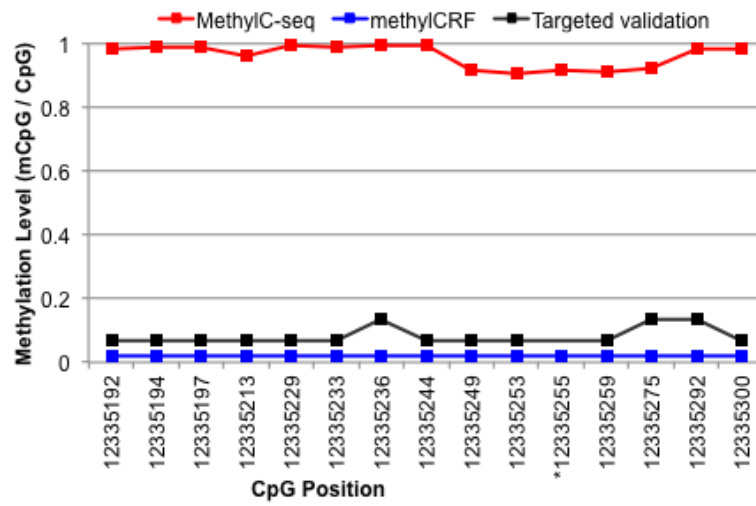

Supplementary Figure 5. Continued.

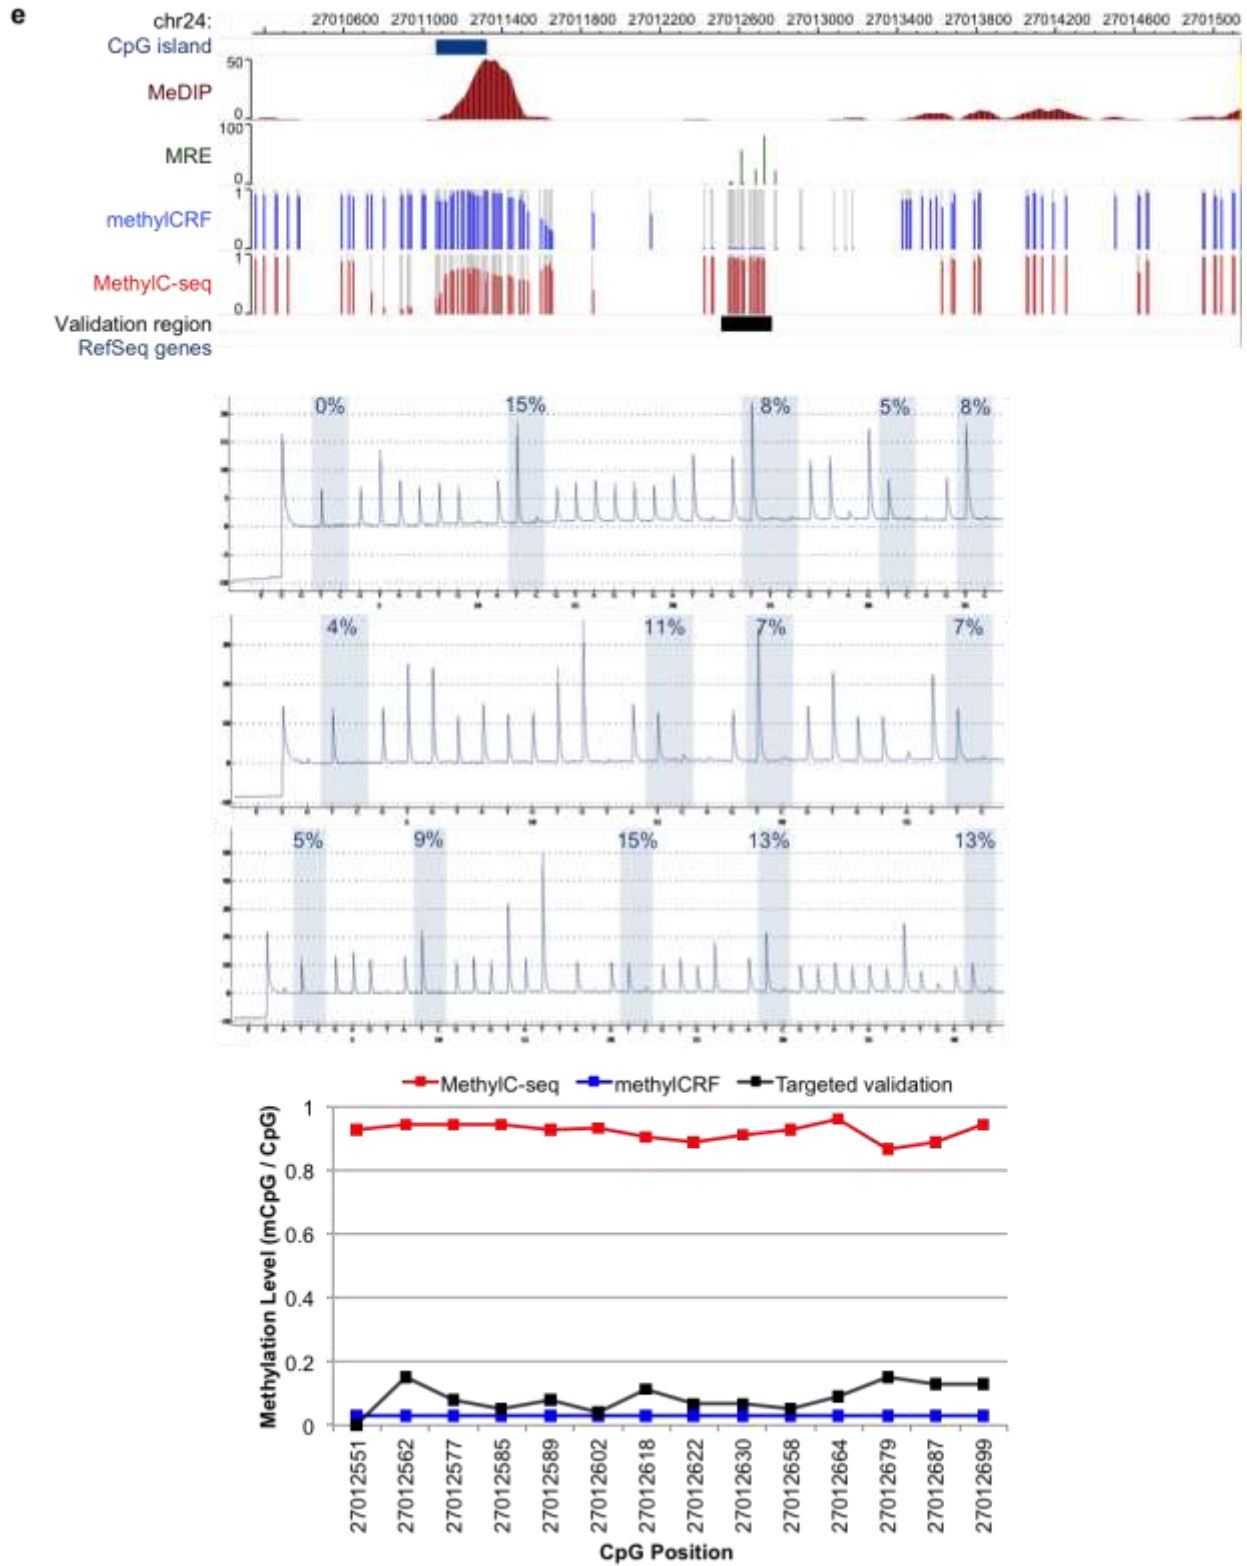

Supplementary Figure 5. Continued.

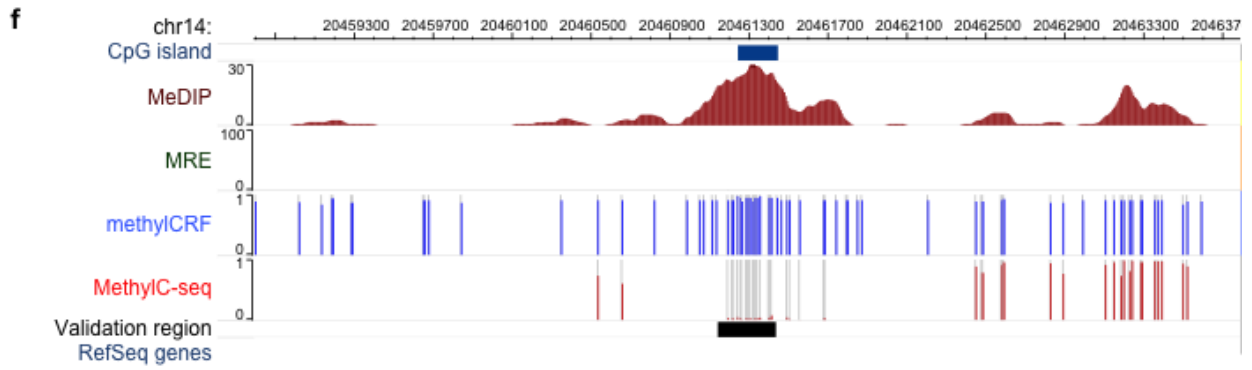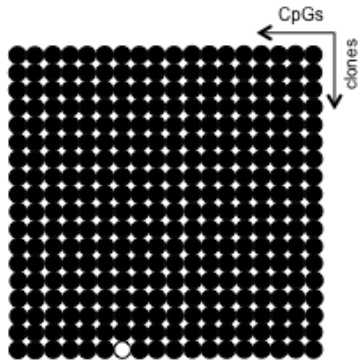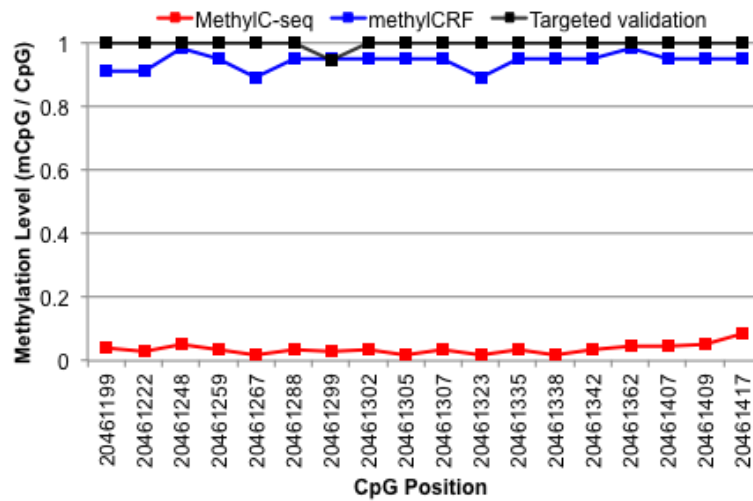

Supplementary Figure 5. Continued.

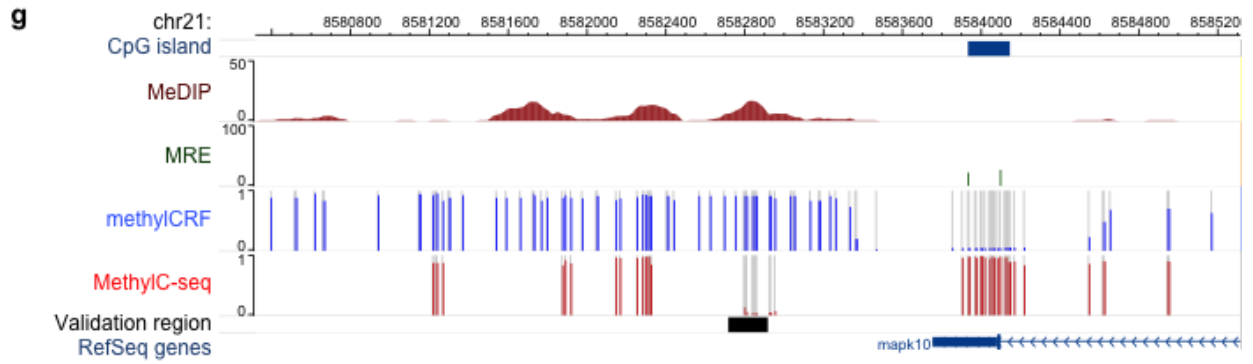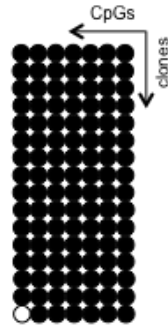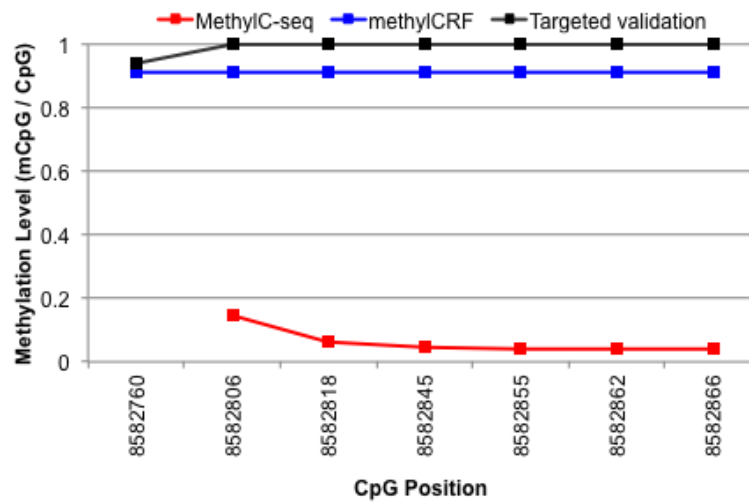

Supplementary Figure 5. Continued.

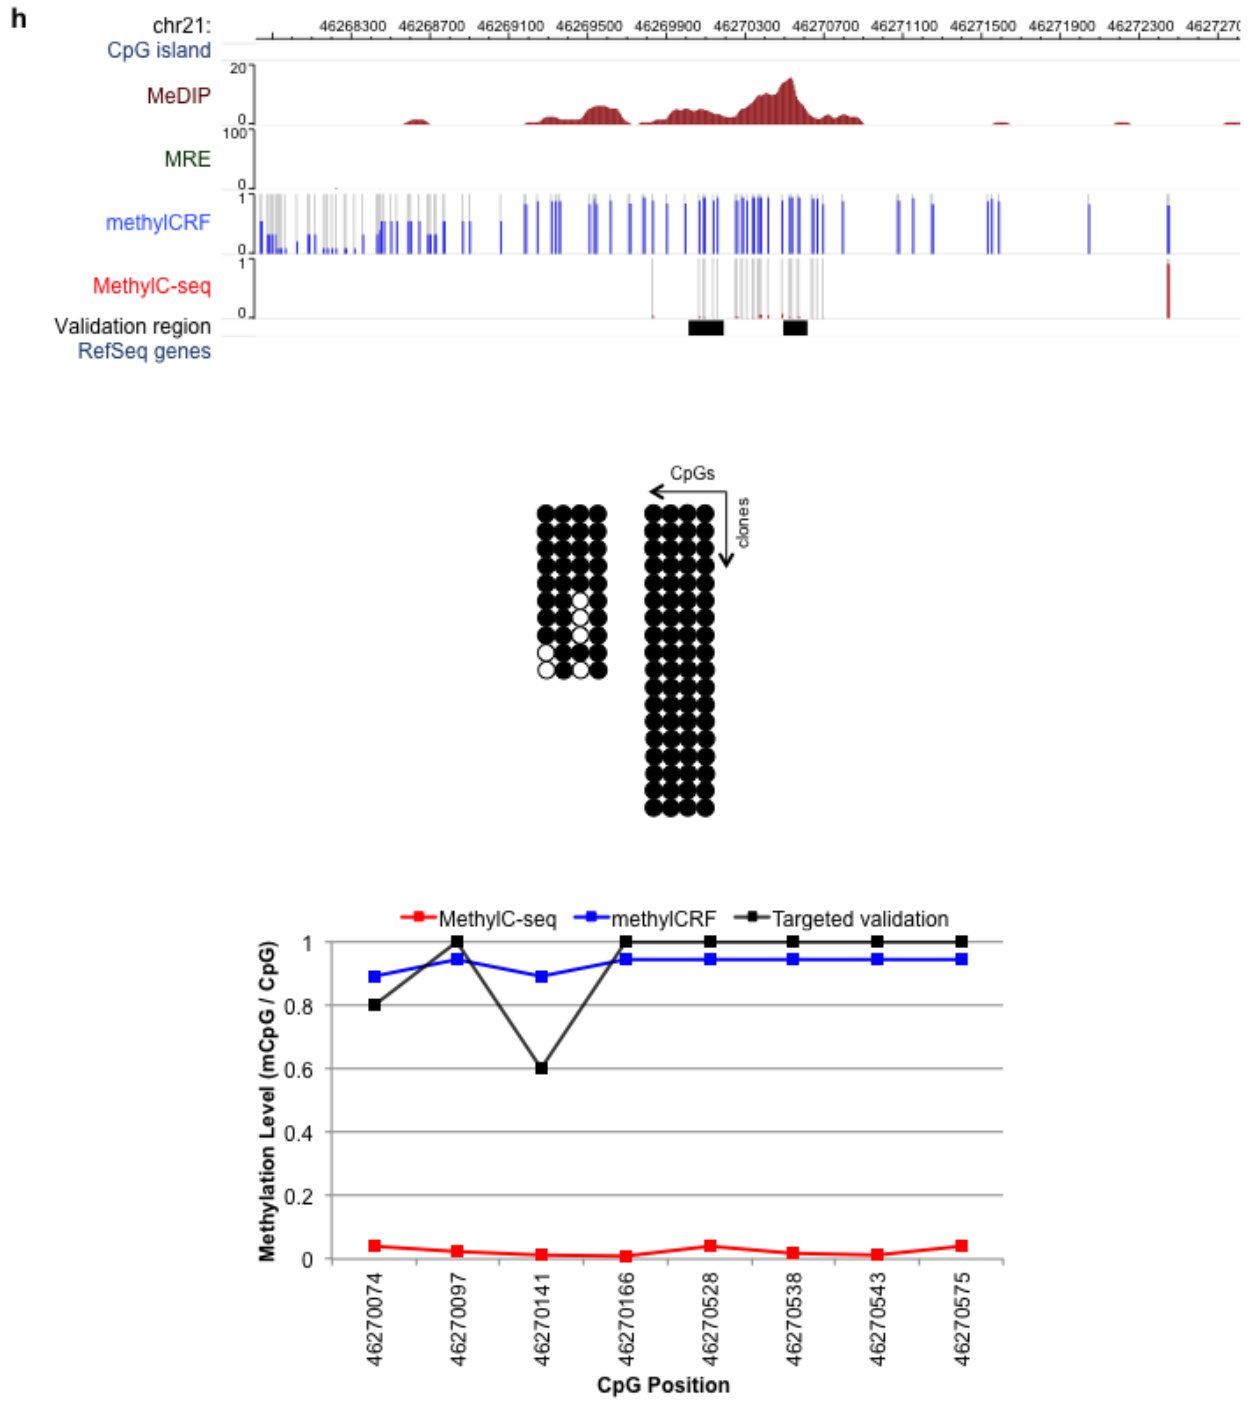

**Supplementary Figure 5. Continued.****i**

| Validated region coordinates<br>(Zv9) | Number of<br>CpGs | Average DNA methylation level |           |                             | RMSE                          |           |
|---------------------------------------|-------------------|-------------------------------|-----------|-----------------------------|-------------------------------|-----------|
|                                       |                   | MethylC-seq<br>(Potok et al.) | methylCRF | site-specific<br>validation | MethylC-seq<br>(Potok et al.) | methylCRF |
| chr1:42015593-42015753                | 8                 | 0.95                          | 0.03      | 0.04                        | 0.91                          | 0.04      |
| chr14:25157201-25157370               | 8                 | 0.93                          | 0.02      | 0.02                        | 0.92                          | 0.03      |
| chr20:39657499-39657620               | 7                 | 0.92                          | 0.02      | 0.03                        | 0.89                          | 0.02      |
| chr22:12335157-12335326               | 15                | 0.96                          | 0.02      | 0.08                        | 0.88                          | 0.07      |
| chr24:27012514-27012771               | 12                | 0.92                          | 0.03      | 0.09                        | 0.83                          | 0.07      |
| chr14:20461146-20461441               | 18                | 0.04                          | 0.94      | 1.00                        | 0.96                          | 0.06      |
| chr21:8582721-8582922                 | 7                 | 0.02                          | 0.93      | 0.93                        | 0.94                          | 0.09      |
| chr5:46270017-46270621                | 8                 | 0.06                          | 0.91      | 1.00                        | 0.91                          | 0.12      |

**Supplementary Figure 6.** The average DNA methylation level predicted by methylCRF throughout different genomic features: **(a)** protein-coding genes; **(b)** long non-coding RNA genes.

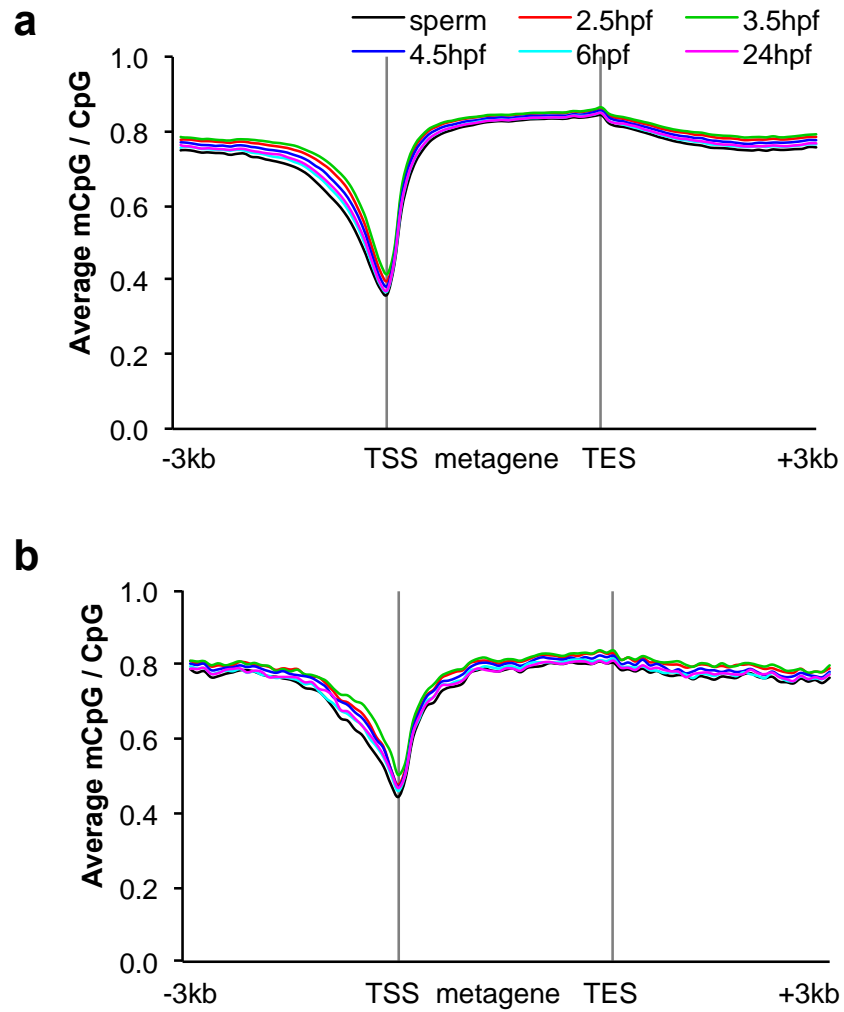



**Supplementary Figure 7.** The average DNA methylation level predicted by MethylC-seq throughout different genomic features: **(a)** gene-associated regions, **(b)** CpG islands and neighboring regions, **(c)** protein-coding genes, **(d)** long non-coding RNA genes.

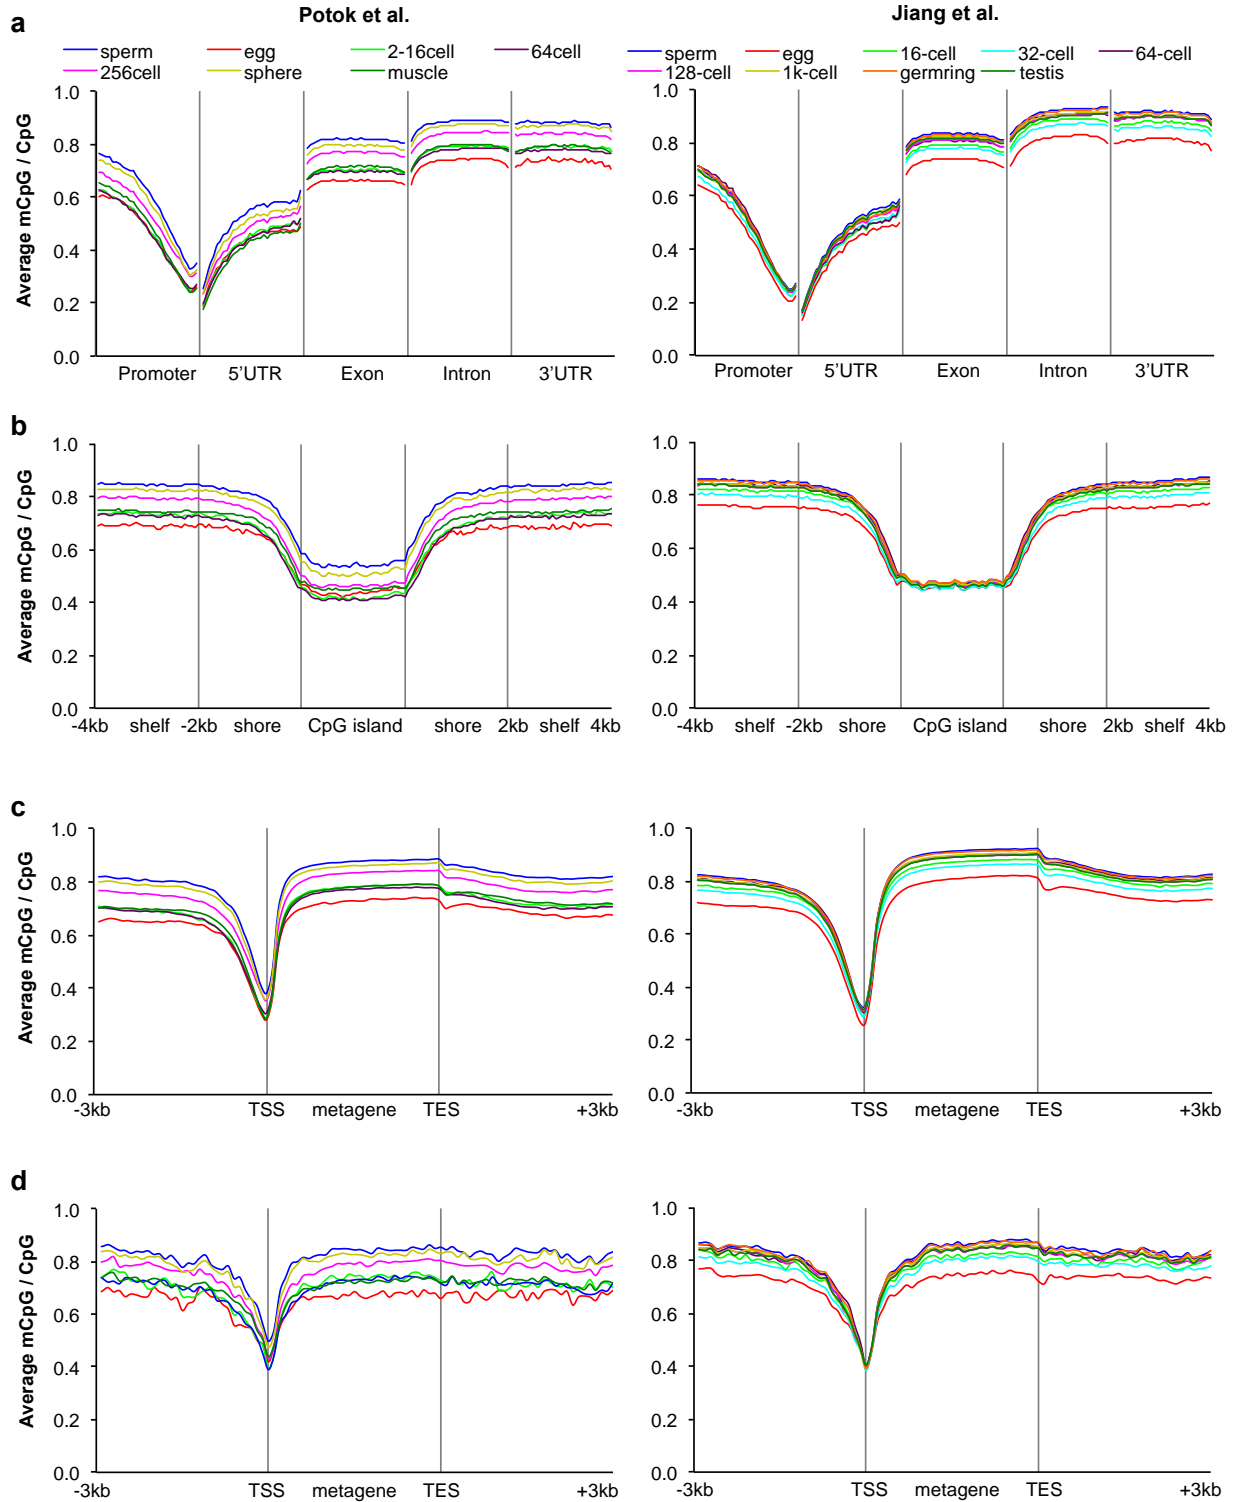

**Supplementary Figure 8.** Characterization of protein-coding genes according to CpG densities of their promoters. **(a)** Distribution of the number of promoters as a function of observed/expected CG ratio in the promoter sequence. **(b)** The average DNA methylation level predicted by methylCRF or MethyIC-seq over all promoters (top row), HCPs (middle row) and LCPs (bottom row). The average CpG densities (grey lines) over the regions were also plotted.

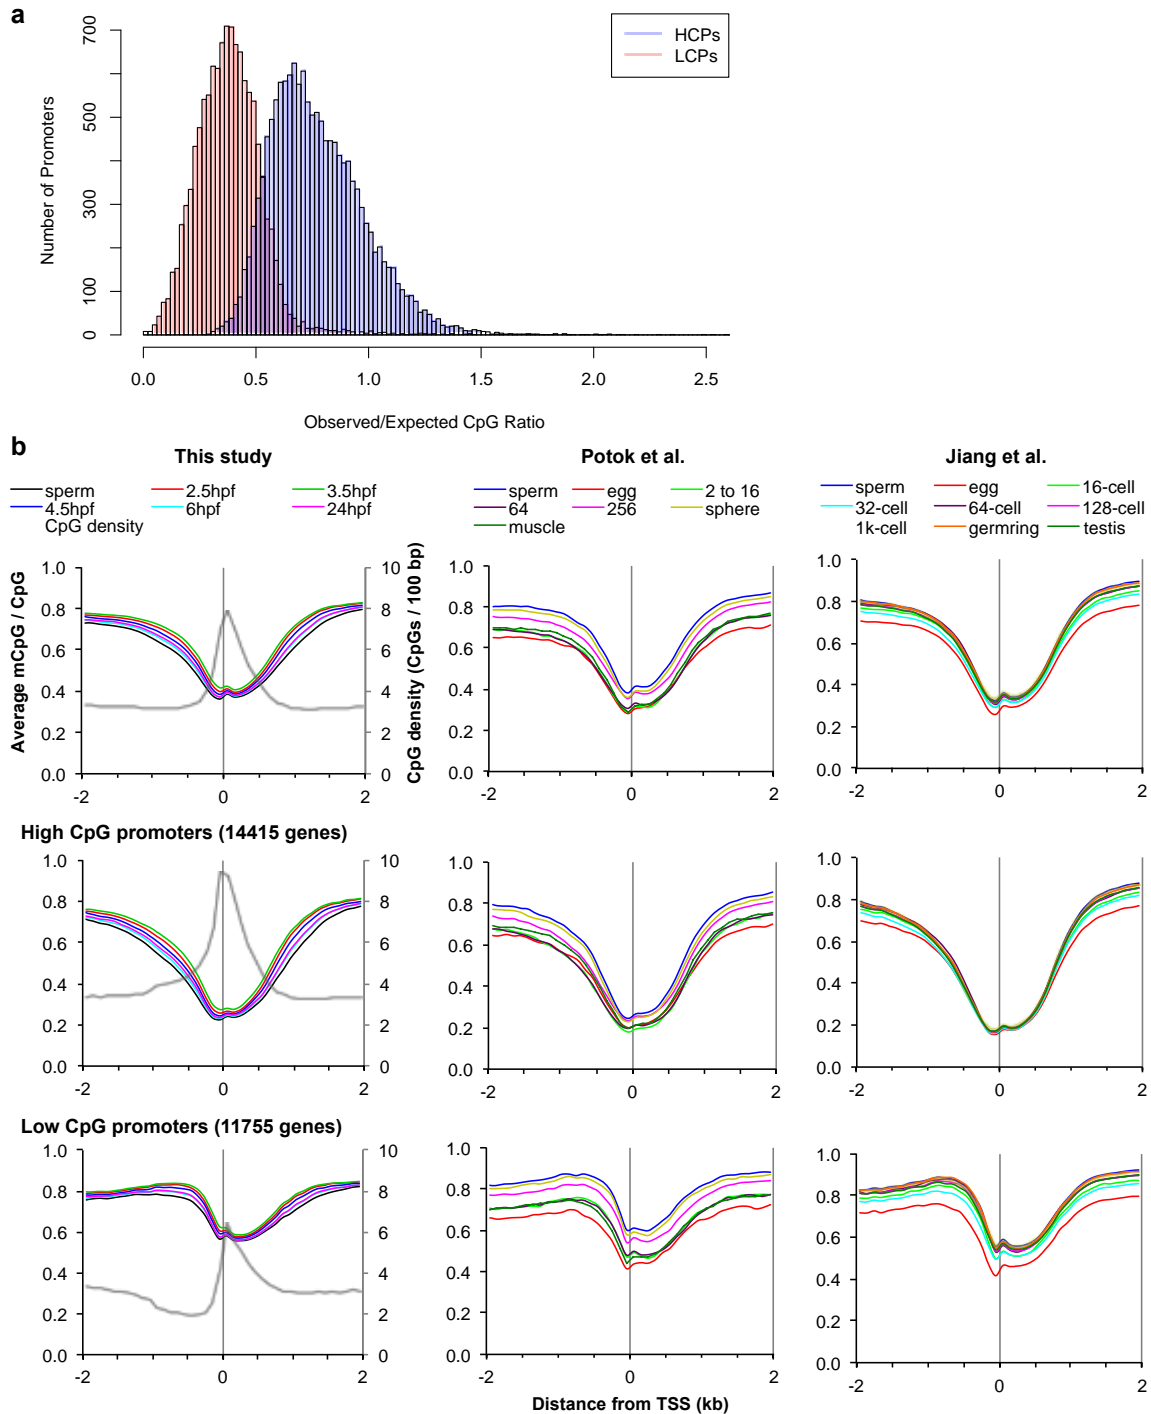

**Supplementary Figure 9.** Identification of the differentially methylated regions (DMRs). **(a)** The number of DMRs identified in each pair-wise comparison. DMRs were identified between two developmental stages and divided into two categories, increasing and decreasing DNA methylation, according to the relative DNA methylation levels. **(b)** The number of DMRs identified between different developmental stages. DMRs with increasing DNA methylation levels across developmental stages were plotted on the top, and DMRs with decreasing DNA methylation levels were plotted on the bottom (downward). The genomic locations of DMRs were indicated by different colors. **(c)** The boxplots of DNA methylation level differences of each DMR. Single CpG DNA methylation levels were predicted by methylCRF and averaged for each DMRs. The boxplots were plotted for each pair-wise comparison. Y-axis is the difference of the DMR region methylation levels in the later developmental time point minus that of the earlier time point.

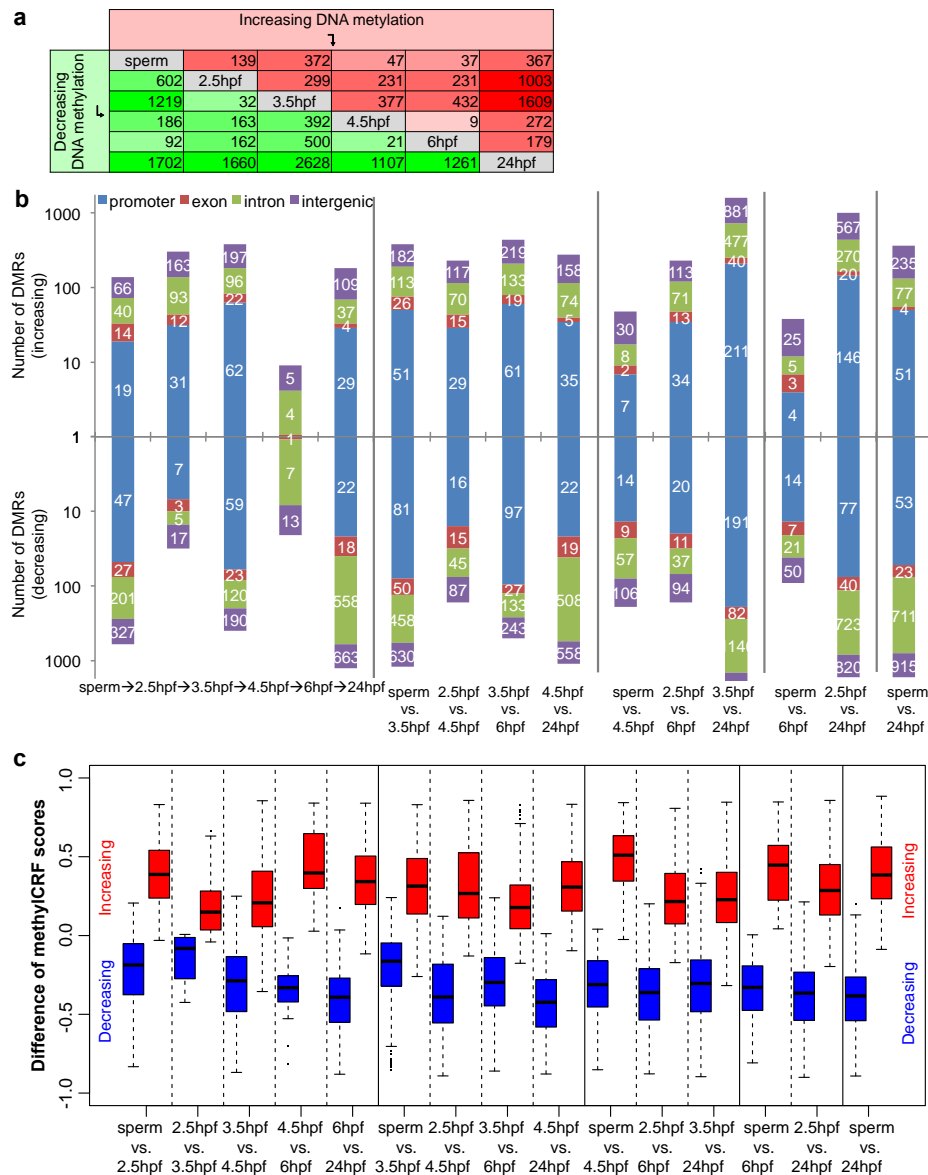

**Supplementary Figure 10.** Characterization of the dsDMRs. **(a)** The distances of dsDMRs from their closest TSS. **(b)** The number of dsDMRs within 50 kb from each TSS of developmental gene or of random gene was plotted as violin plot. **(c)** A weighted Venn diagram of the number of dsDMRs overlapping with histone modification peaks from the specific developmental stages. **(d)** Histone modification signature of dsDMRs. Average ChIP-seq RPKM values from the specific developmental stages were plotted over 10 kb regions centered on the dsDMRs. **(e)** Heat maps of ChIP-seq signal over 10 kb regions centered on individual dsDMRs.

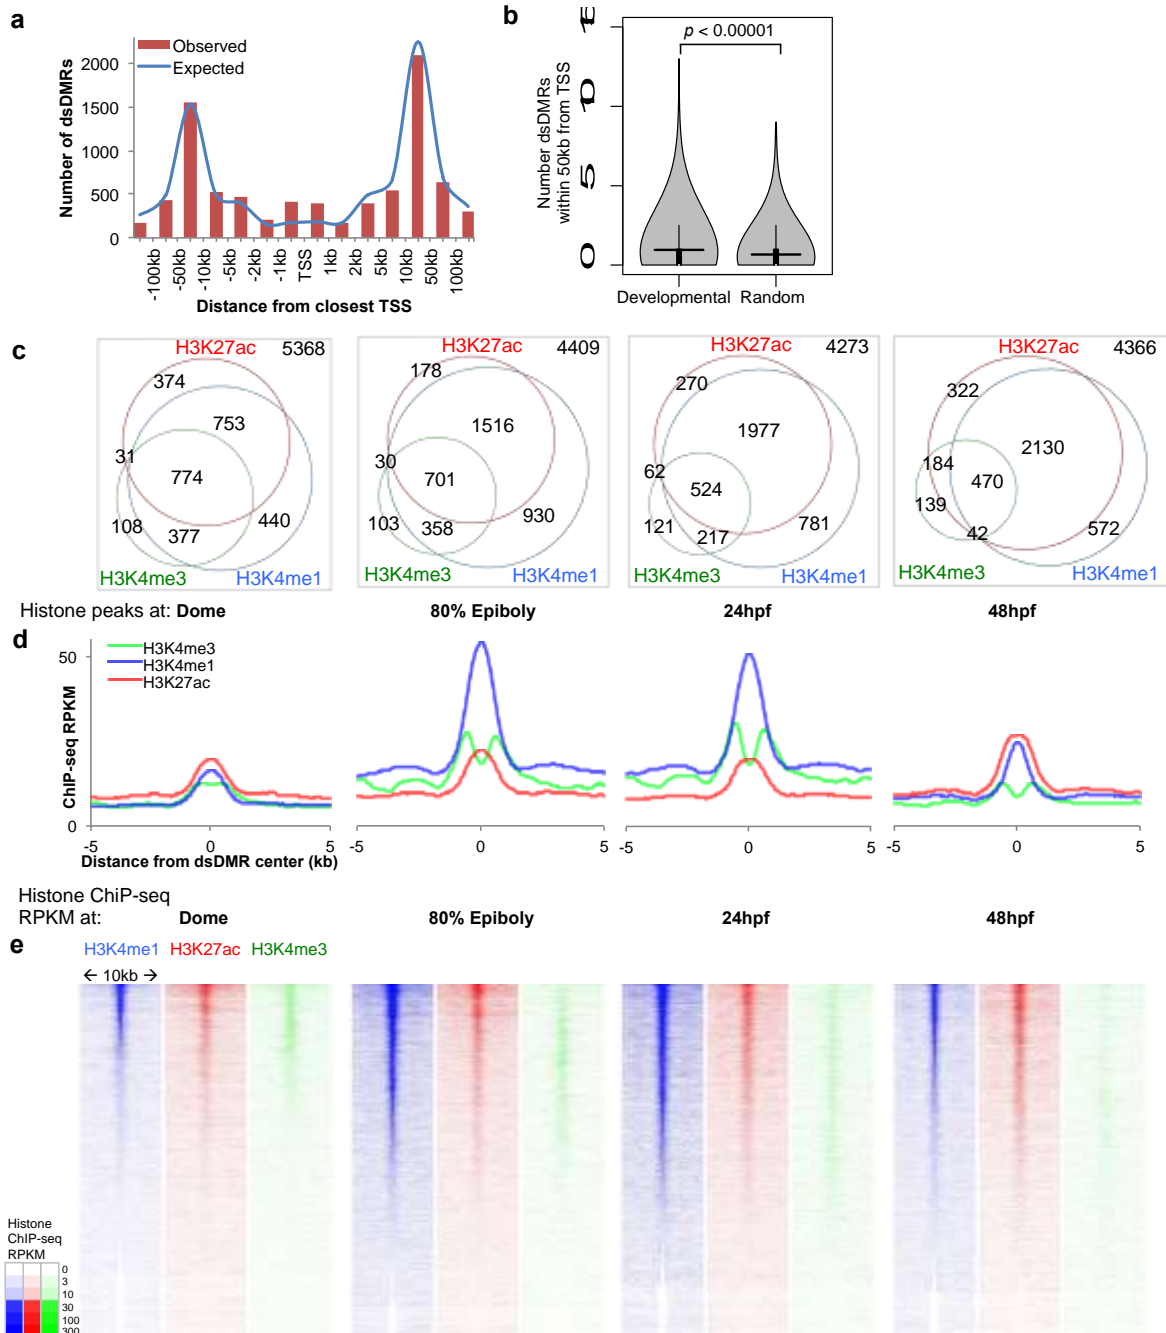

**Supplementary Figure 11.** Gene Ontology (GO) enrichment of dsDMRs. **(a)** A full list of enriched GO terms and their binomial p-values for dsDMRs with decreasing DNA methylation level between 6 hpf and 24 hpf. **(b)** Local directed acyclic graph based on the enriched GO Biological Process terms from a single ontology-specific table from GREAT analysis. Enriched terms were shown in blue. Nodes were sized according to binomial fold enrichment.

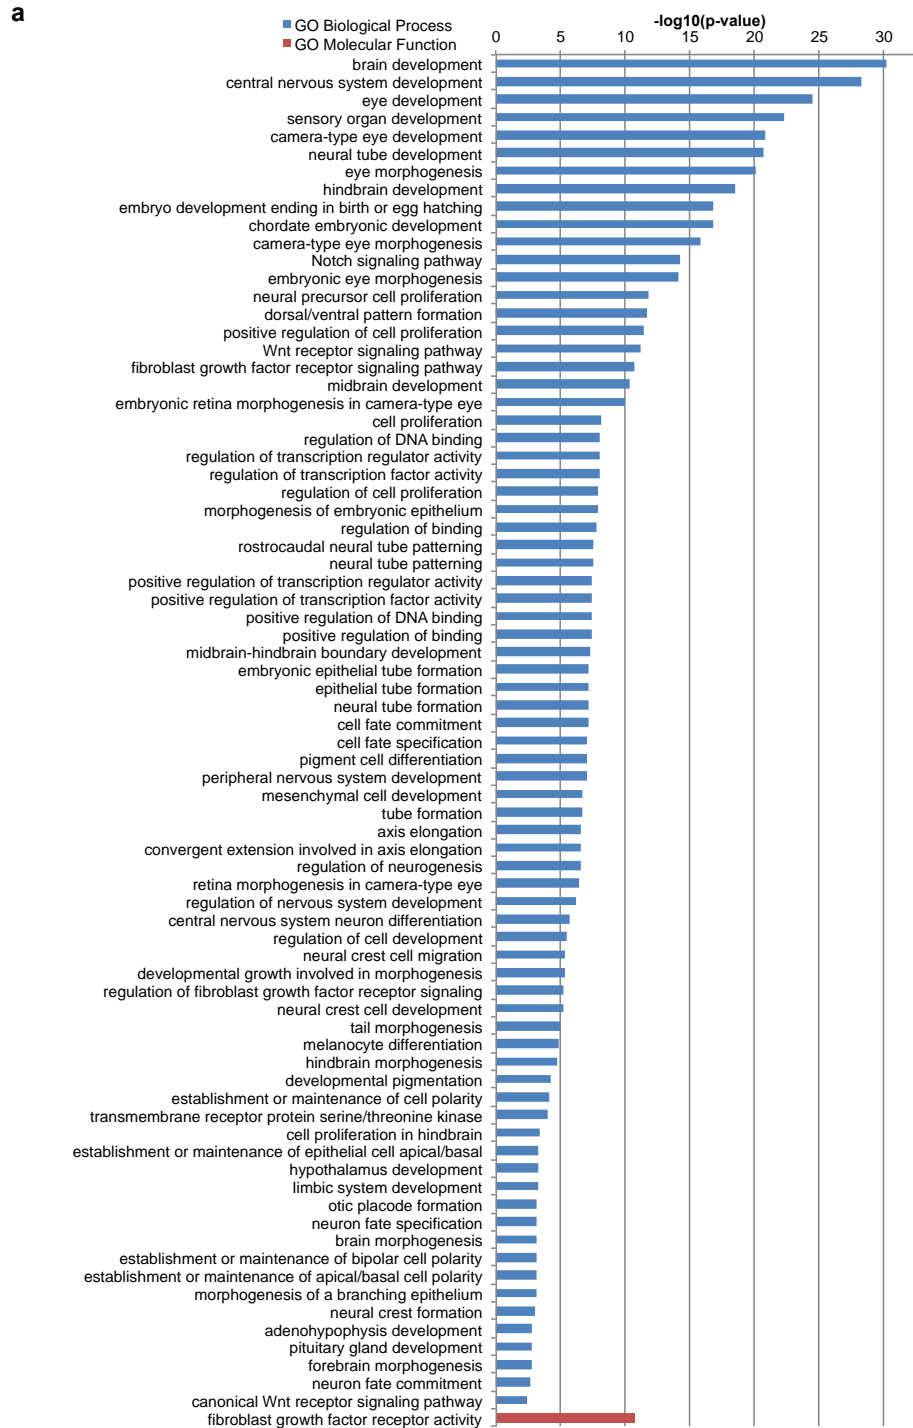

Supplementary Figure 11. Continued.

b

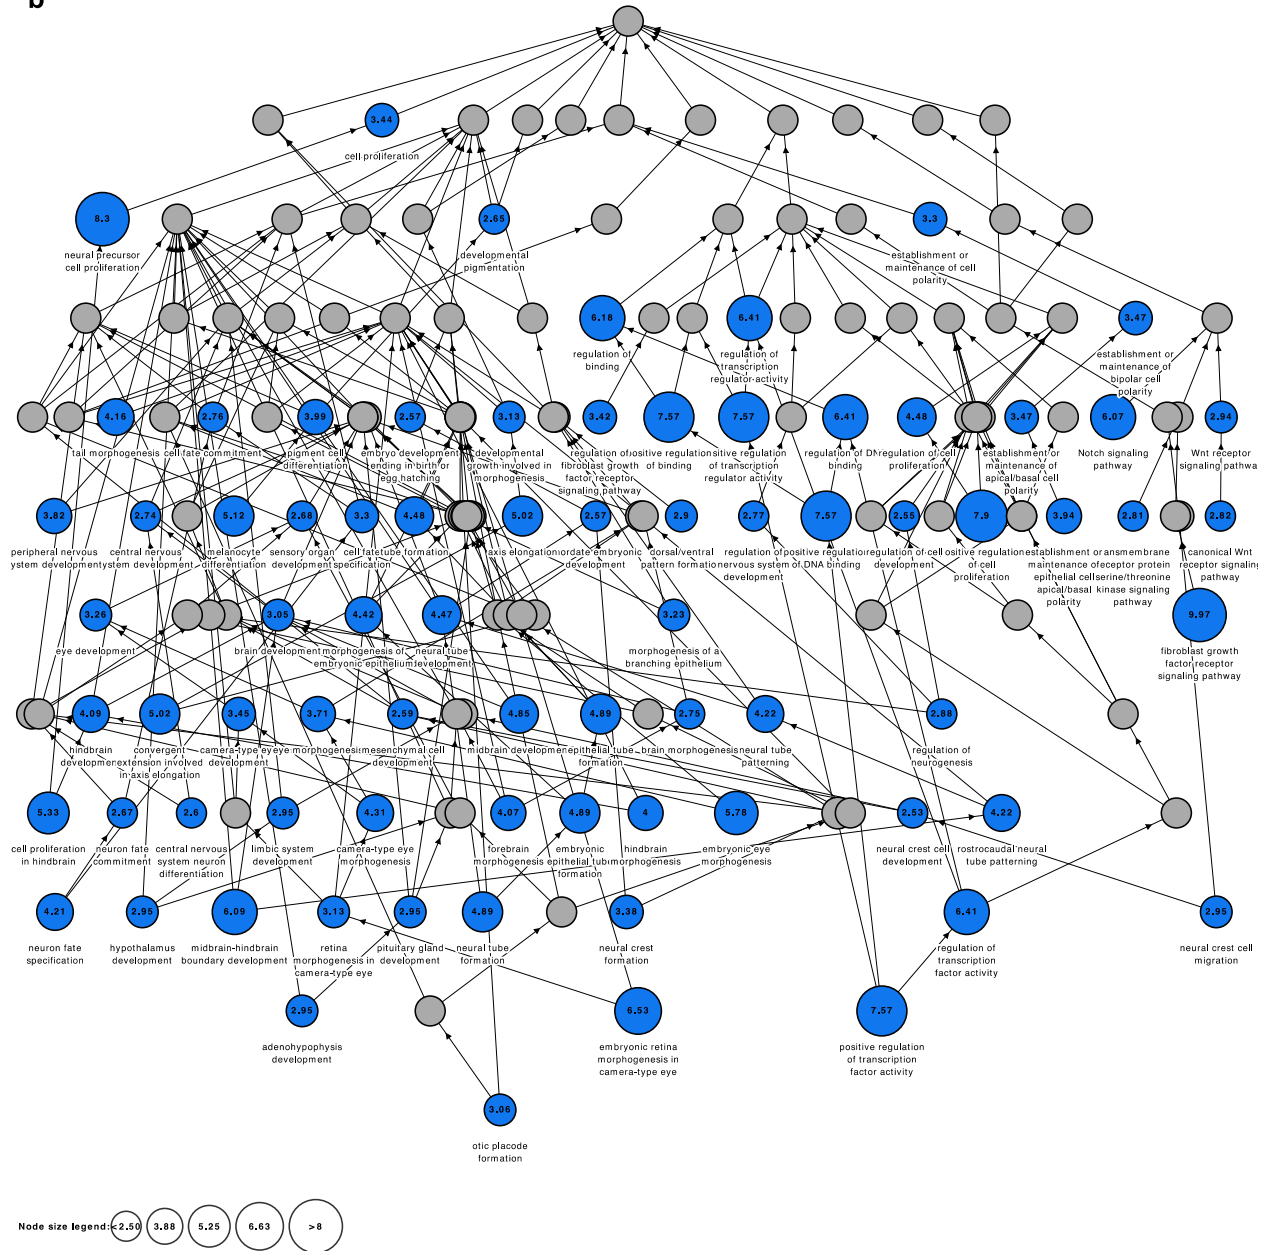

**Supplementary Figure 12.** Expression profiles of genes associated with dsDMRs from GO enrichment analysis across different developmental stages. The y-axis is changed to a log scale from **Fig. 3f**.

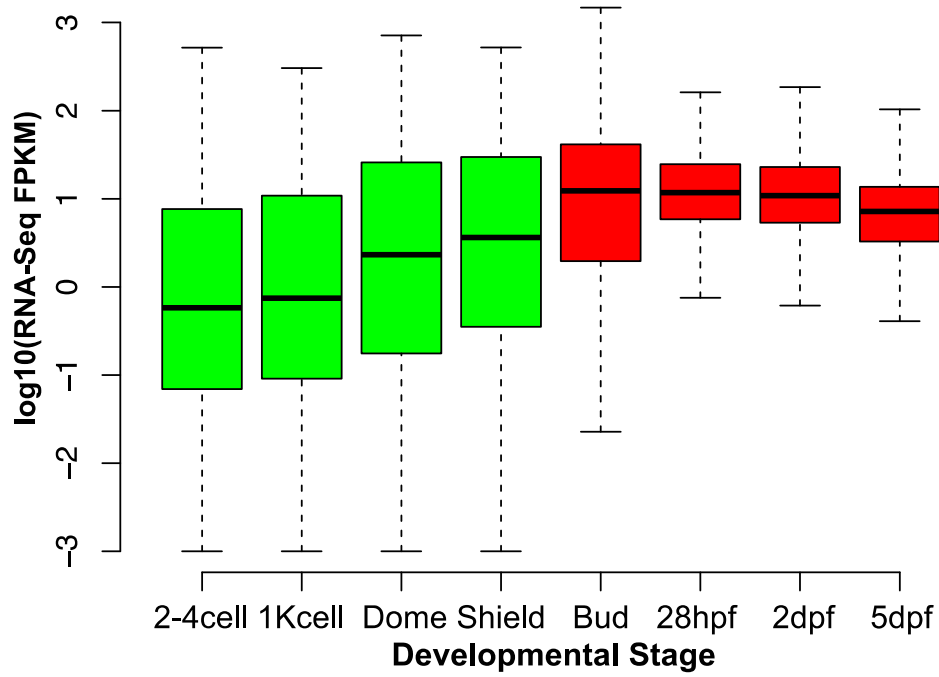

**Supplementary Figure 13.** A full list of enriched motifs in dsDMRs with decreasing DNA methylation level between 6 hpf and 24 hpf and their hypergeometric p-values from HOMER tool. Redundant motifs from HOMER and JASPAR are together displayed.

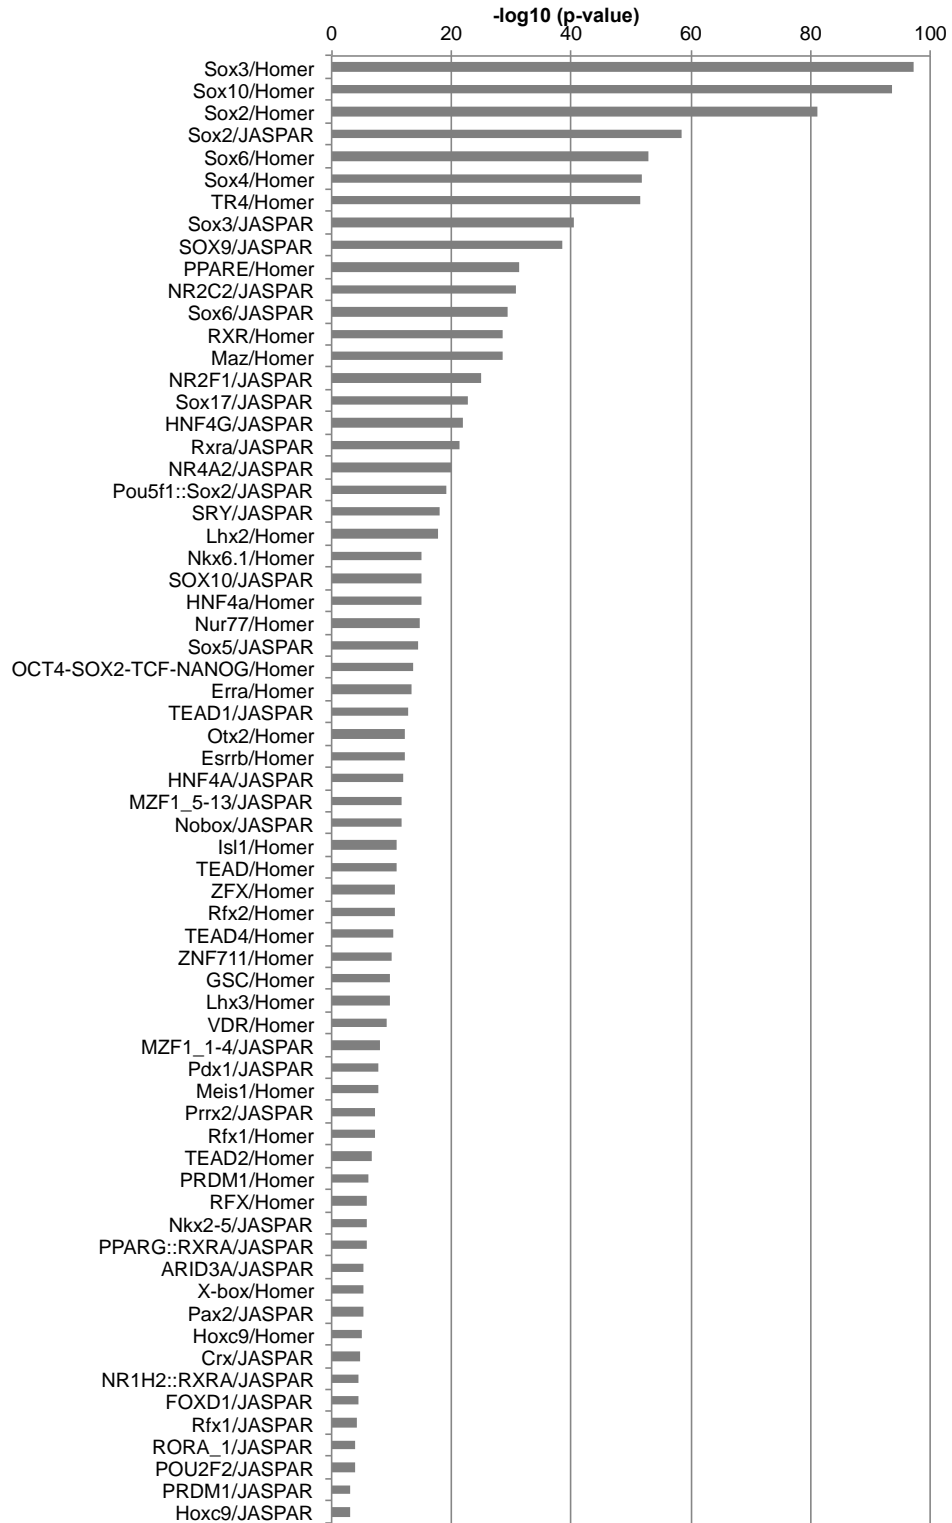



**Supplementary Figure 14.** A list of enriched functional annotations of transcription factors whose motifs are enriched in dsDMRs against the genomic background and their p-values from DAVID tool.

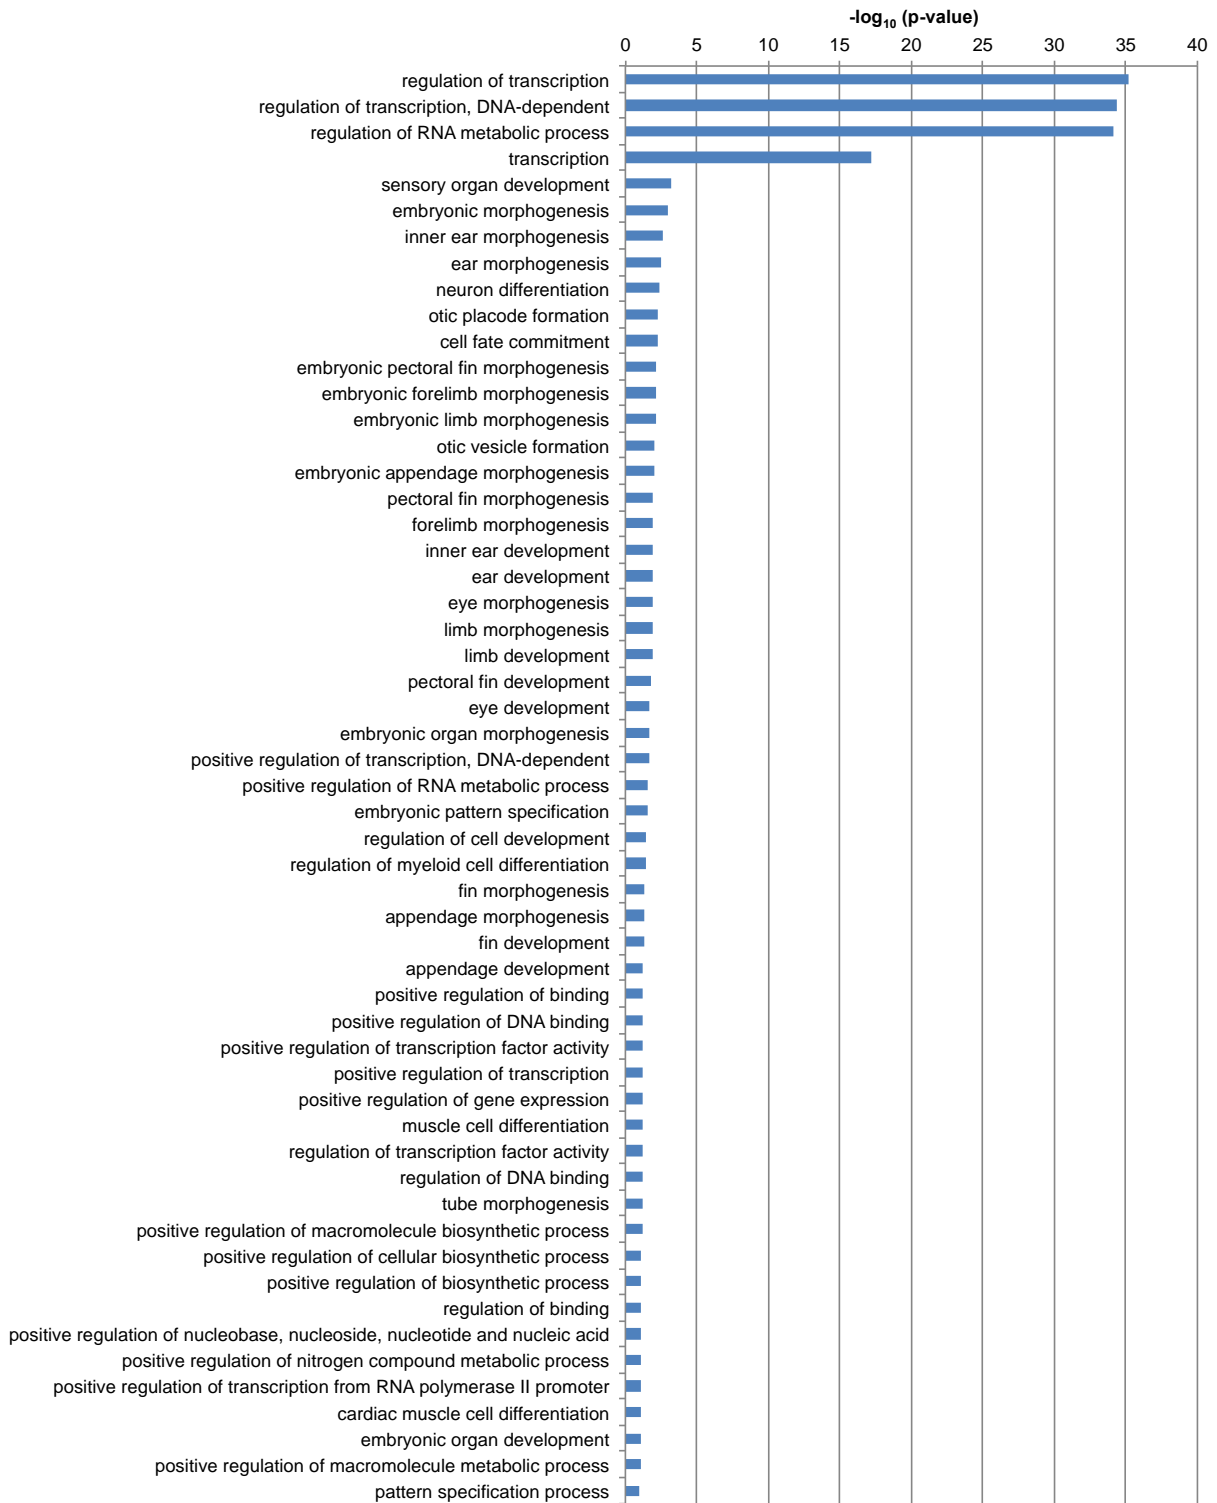

**Supplementary Figure 15.** Regulatory relationships among the putative targets and TFs identified in dsDMRs (a) A list of enriched functional annotations of transcription factors whose motifs are enriched in dsDMRs against the all TFs background and their fold enrichment scores from DAVID tool. (b) A table of the number of connections found by querying databases of TF-target genes. When the TFs and genes identified from dsDMRs were used, significantly larger number of connections was found than when random TFs and genes were used.

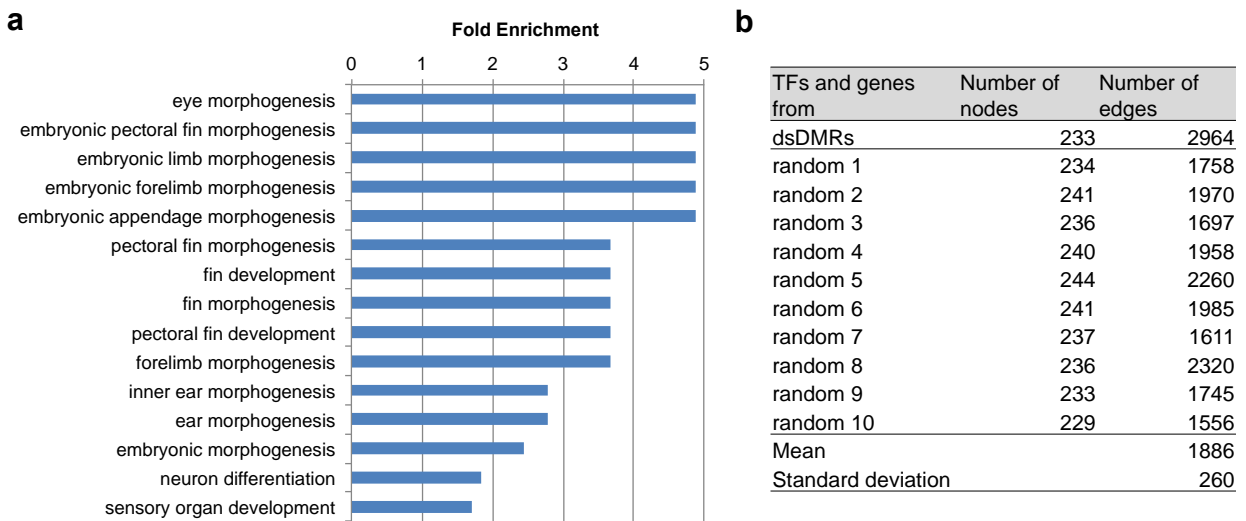

**Supplementary Figure 16.** Characteristics of the target genes in the regulatory network of the eye development. **(a)** Histogram of the distances of dsDMRs containing binding motifs from their linked target genes. **(b)** Expression profiles of downstream target genes of the eye development across different developmental stages. Most of the target genes showed increased expression levels from shield (6 hpf) to 28 hpf embryo stage.

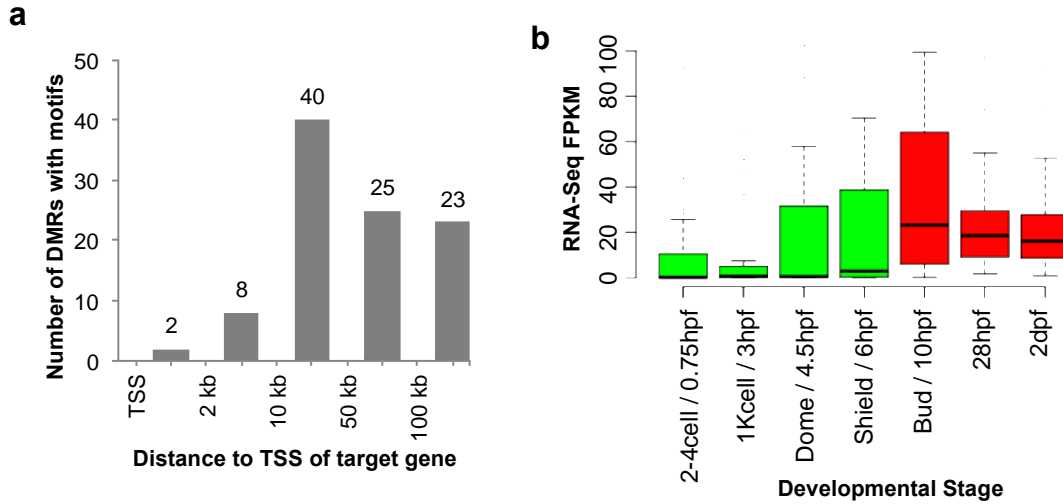

**Supplementary Figure 17. Identification of novel target genes for eye development** (a) The gene set view of 7 genomic regions (chr8:204234-207234, chr8:223250-226250, chr18:42528702-42531702, chr18:42648750-42651750, chr7:51171256-51174256, chr7:51180250-51183250, chr7:51223750-51226750) from the Epigenome Browser. The left panel displayed the regions around *sema6a* promoter and its nearby dsDMR enhancer (indicated by the black box). The middle panel displayed the regions around *cdon* promoter and its nearby dsDMR enhancer. The right panel displayed the regions around *ascl1b* promoter and its two nearby dsDMR enhancers. These dsDMRs had Sox2, Lhx2, and Otx2 binding motifs (red ticks), suggesting that these genes could be downstream target genes in the regulatory network of the eye development. (b-d) The gene expression profiles of the novel target genes: *sema6a* (b), *cdon* (c), and *ascl1b* (d).

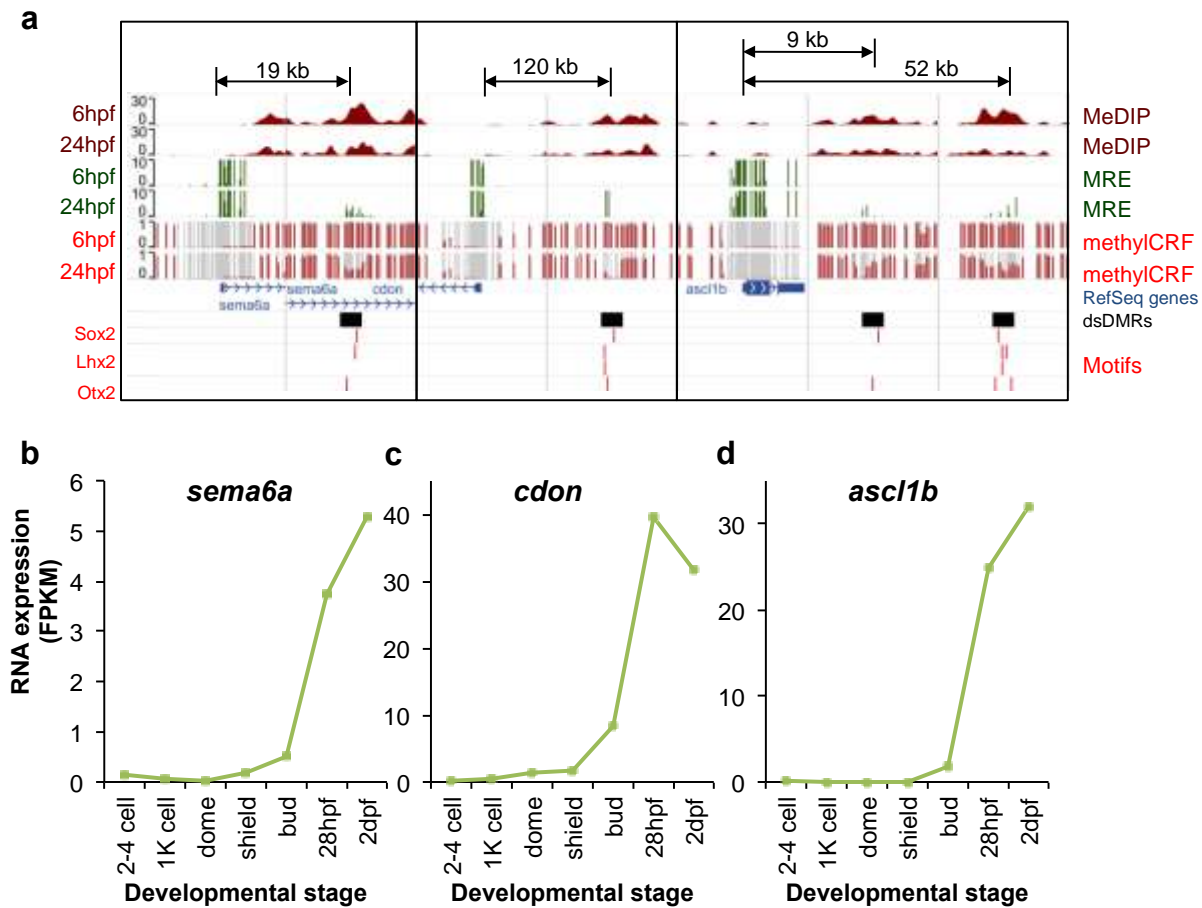

**Supplementary Figure 18.** Gene regulatory network of the central nervous system neuron differentiation.

(a) The putative gene regulatory network of central nervous system neuron differentiation derived from dsDMR analysis. The blue ovals were transcription factors whose motifs were enriched in dsDMRs. The genes in the grey boxes were the target genes identified in GREAT analysis. Arrows indicates that the transcription factors had their binding motifs in neighboring dsDMRs of the target genes. (b) The methylation profiles of the *nkx6.1* and *isl1* promoters and their neighboring dsDMR enhancers (blue and red lines, left y-axis) and the expression profile of the two genes (green lines, right y-axis). Each gene expression level was normalized to the expression level of dome stage. (c) The gene set view of 7 genomic regions from the Epigenome browser. The left panel displayed the regions around *nkx6.1* promoter and its nearby dsDMR enhancers (black box). The right panel displayed the regions around *isl1* promoter and its nearby dsDMR enhancers. Both dsDMRs had NR4A2, Nkx6.1 and Isl1 binding motifs (red ticks). (d) The gene set view of 7 genomic regions from the Epigenome browser. The left, middle, and right panels displayed the regions around *foxn4*, *neurog1*, and *gli2a* promoters and its nearby dsDMR enhancers (black box), respectively. NR4A2, Nkx6.1 and Isl1 binding motifs within each dsDMRs were displayed as red ticks, suggesting that these genes could be downstream target genes in the regulatory network of the central nervous system neuron differentiation.

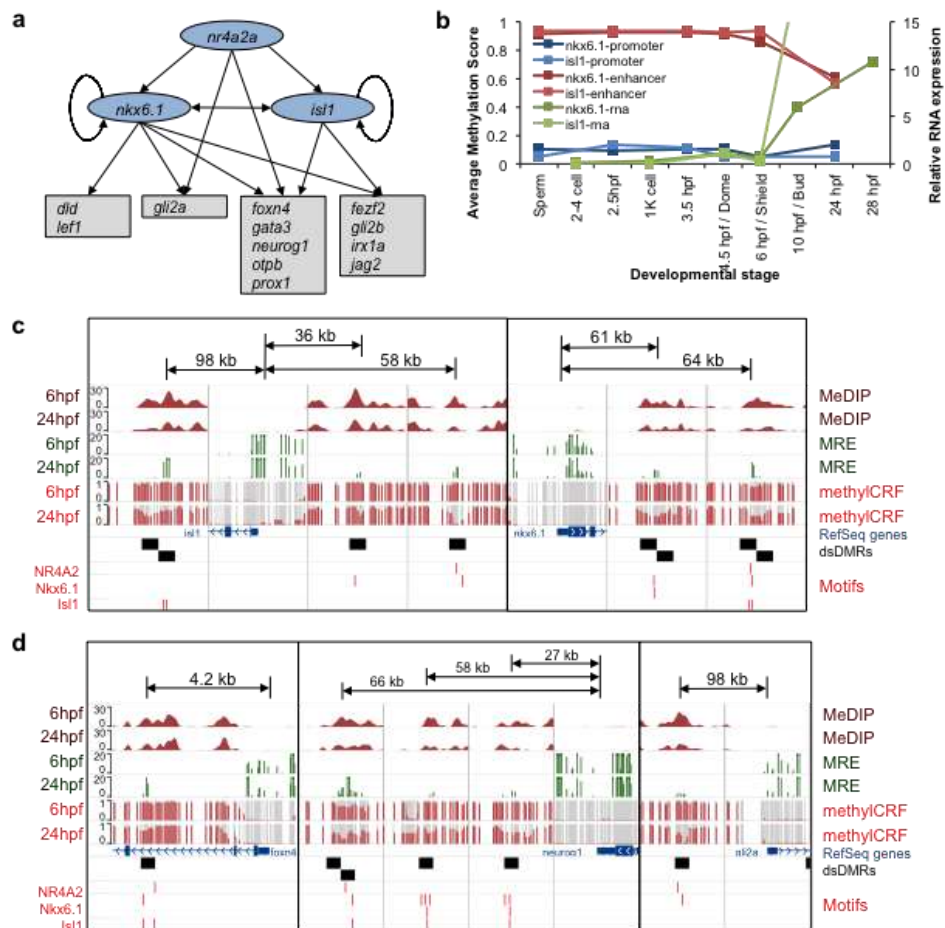

**Supplementary Figure 19.** GFP expression patterns in G0 embryos injected with dsDMR enhancers and negative controls. G0 embryos injected with a specific putative enhancer reporter construct expressed GFP in a specific pattern. In contrast, G0 embryos injected with the negative controls did not show consistent patterns of GFP expression. Rather, GFP expression was not detected in the majority of G0 embryos. In G0 embryos with detectable GFP expression, expression was very weak and was in spotted and random patterns. Here we present examples of GFP expressions in G0 embryos injected with a validated enhancer construct in comparison to GFP expressions in G0 embryos with a negative control construct. About 40% of G0 embryos injected with *znf703-e1* reporter construct showed the same strong GFP expression patterns. However, no consistent expression pattern was observed in G0 embryos injected with negative control *six3a-ne1* reporter construct. GFP expression in these G0 embryos were very weak and in random pattern. **(a)** Table of G0 embryo numbers showing consistent GFP expression pattern, inconsistent weak GFP expression pattern, or no GFP expression. **(b)** The representative pictures of G0 embryos injected with *znf703-e1* reporter construct or *six3a-ne1* negative control construct.

**a** Number of G0 embryos

| Tested construct        | GFP with consistent patterns | Weak GFP without patterns | No GFP detected |
|-------------------------|------------------------------|---------------------------|-----------------|
| <b><i>znf703-e1</i></b> | 43 (shown in pictures)       | 58                        | 4               |
| <b><i>six3a-ne1</i></b> | 0                            | 36 (shown in pictures)    | 60              |

**b**

***znf703-e1*** (normal exposure)

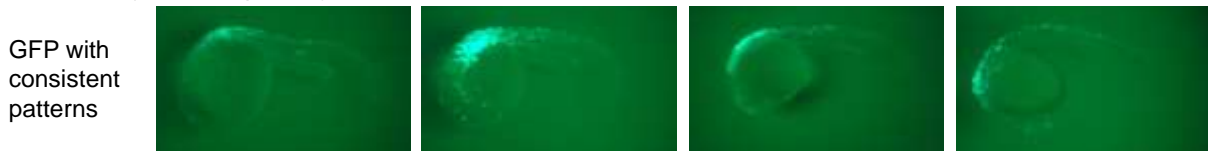

***six3a-ne1*** (maximum exposure)

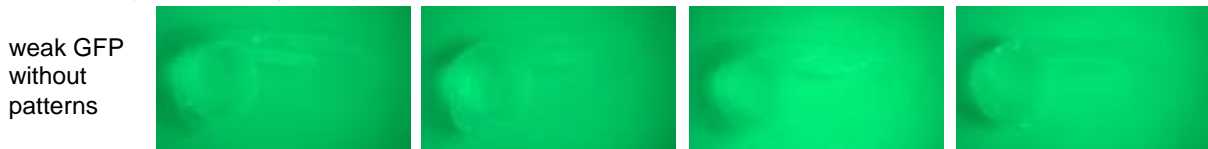

**Supplementary Figure 20.** *In vivo* validation of dsDMR enhancers. **(a,d,g,k,l,m)** WashU Epigenome Browser views of the *six3b* **(a)**, *fgf3* **(d)**, *znf703* **(g)**, *sox2* **(k)**, *wnt3* **(l)**, and *wnt3a* **(m)** genes, their neighboring dsDMR enhancers (grey boxes), and negative controls (dark grey boxes). **(b,e,h,i,n,o)** GFP expression driven by the dsDMR enhancers of the *six3b* **(b)**, *fgf3* **(e)**, *znf703* **(h)**, *sox2* **(i)**, *wnt3* **(n)**, and *wnt3a* **(o)** genes. Forbrain (f); midbrain (m); midbrain hindbrain boundary (mh); spinal cord (sc). The asterisk \* indicates that only one G1 transgenic line was established. **(c,f,j,p)** The expression patterns of the nearby genes: *six3b* **(c)**, *fgf3* **(f)**, *znf703* and *sox2* **(j)**, and *wnt3* and *wnt3a* **(p)**.

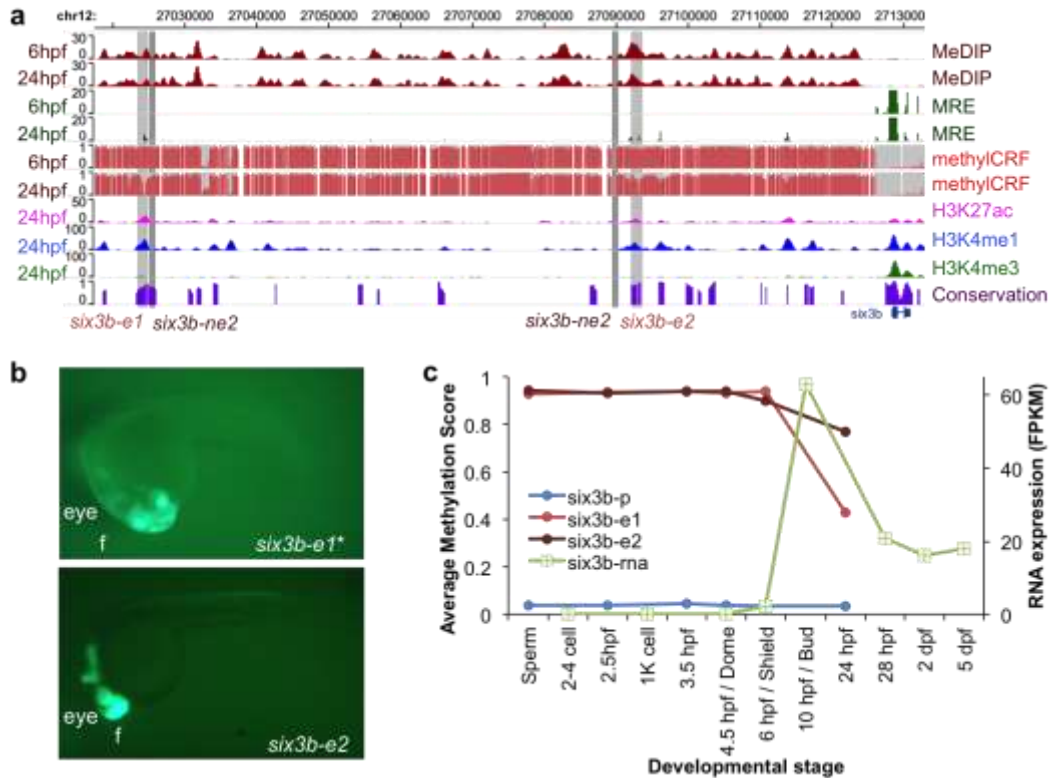

Supplementary Figure 20. Continued.

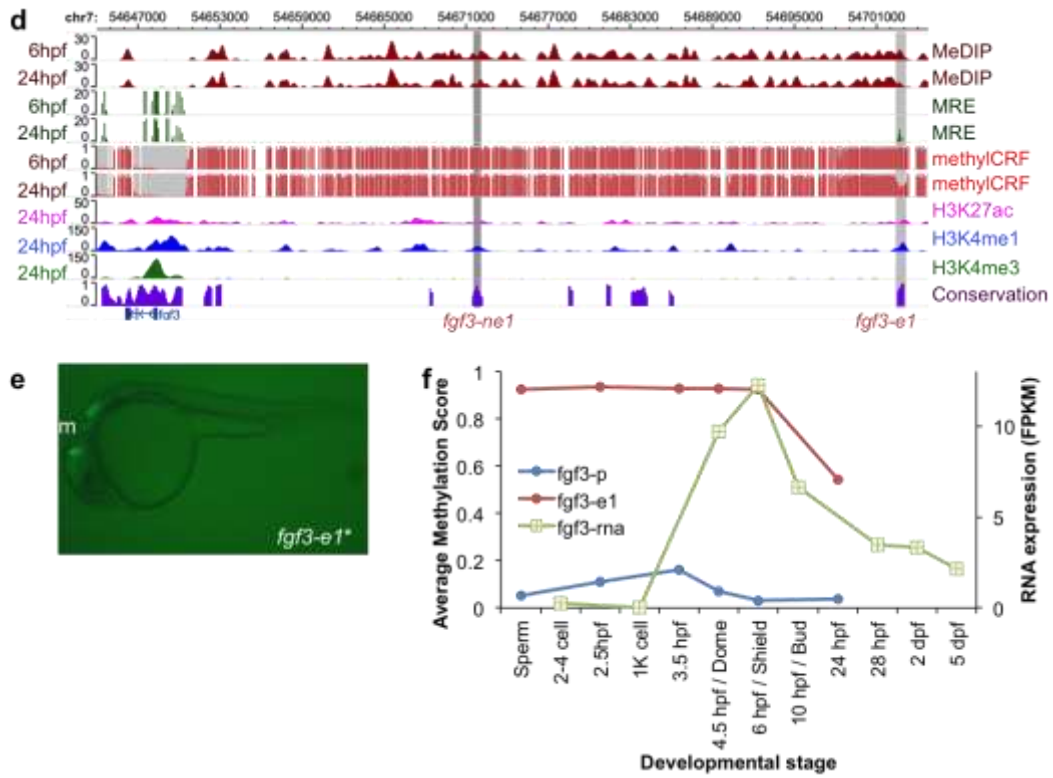



Supplementary Figure 20. Continued.

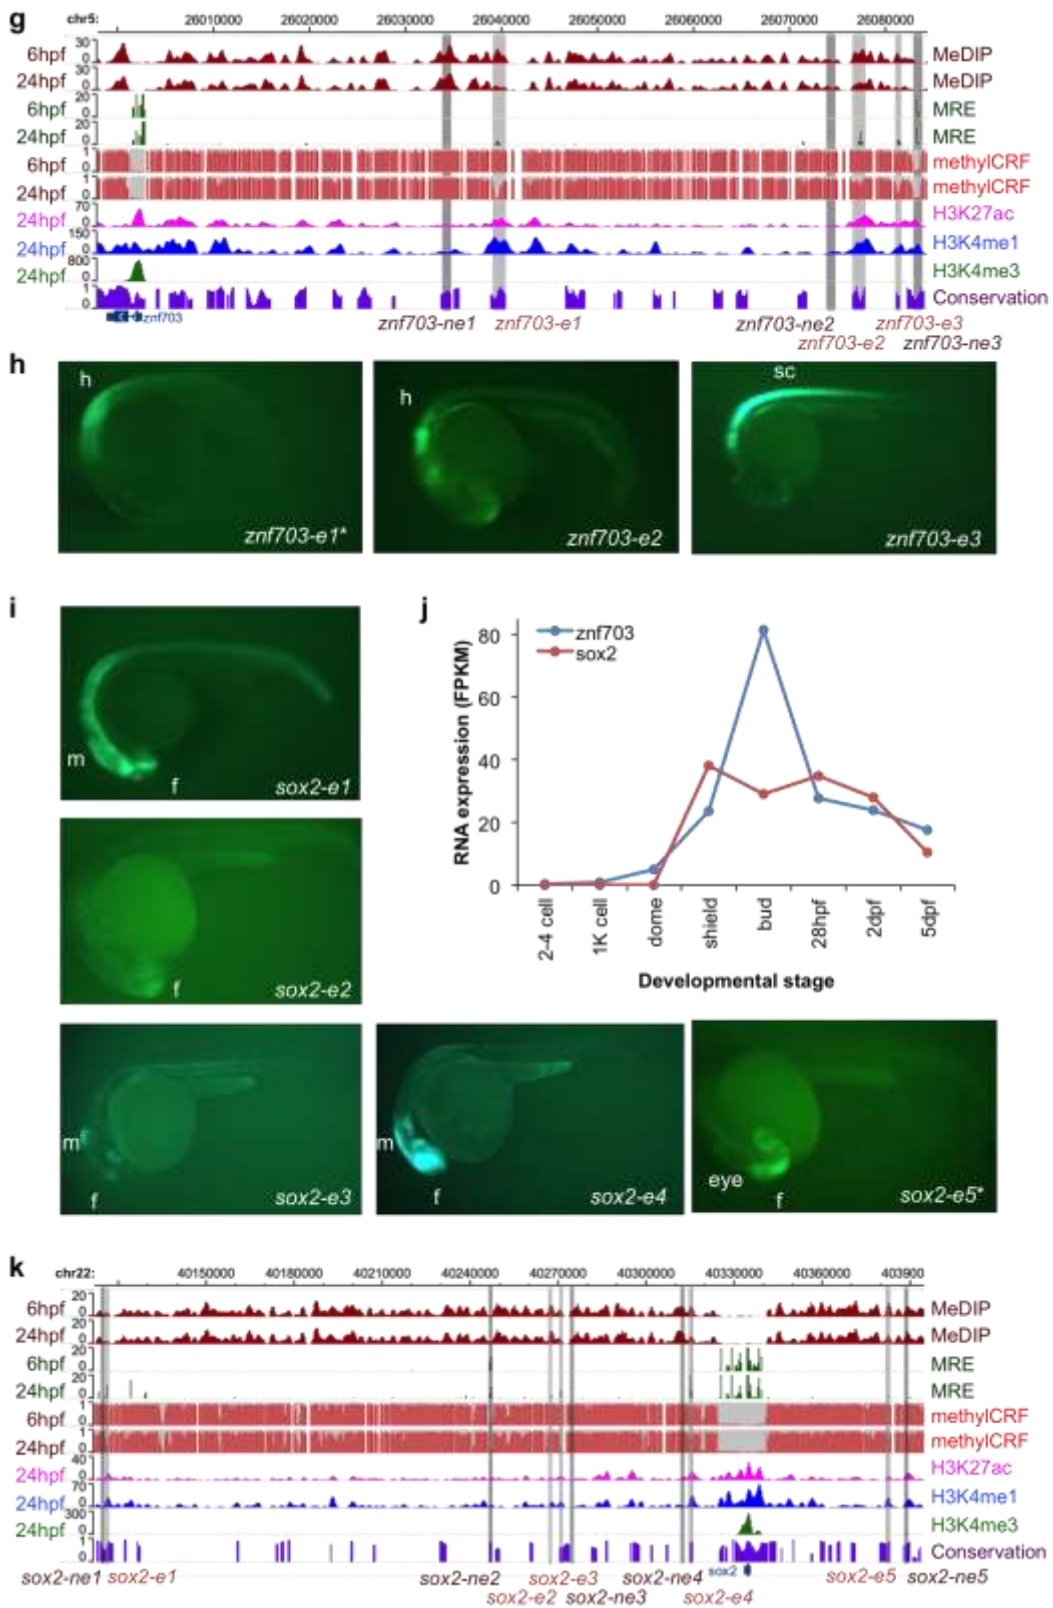

Supplementary Figure 20. Continued.

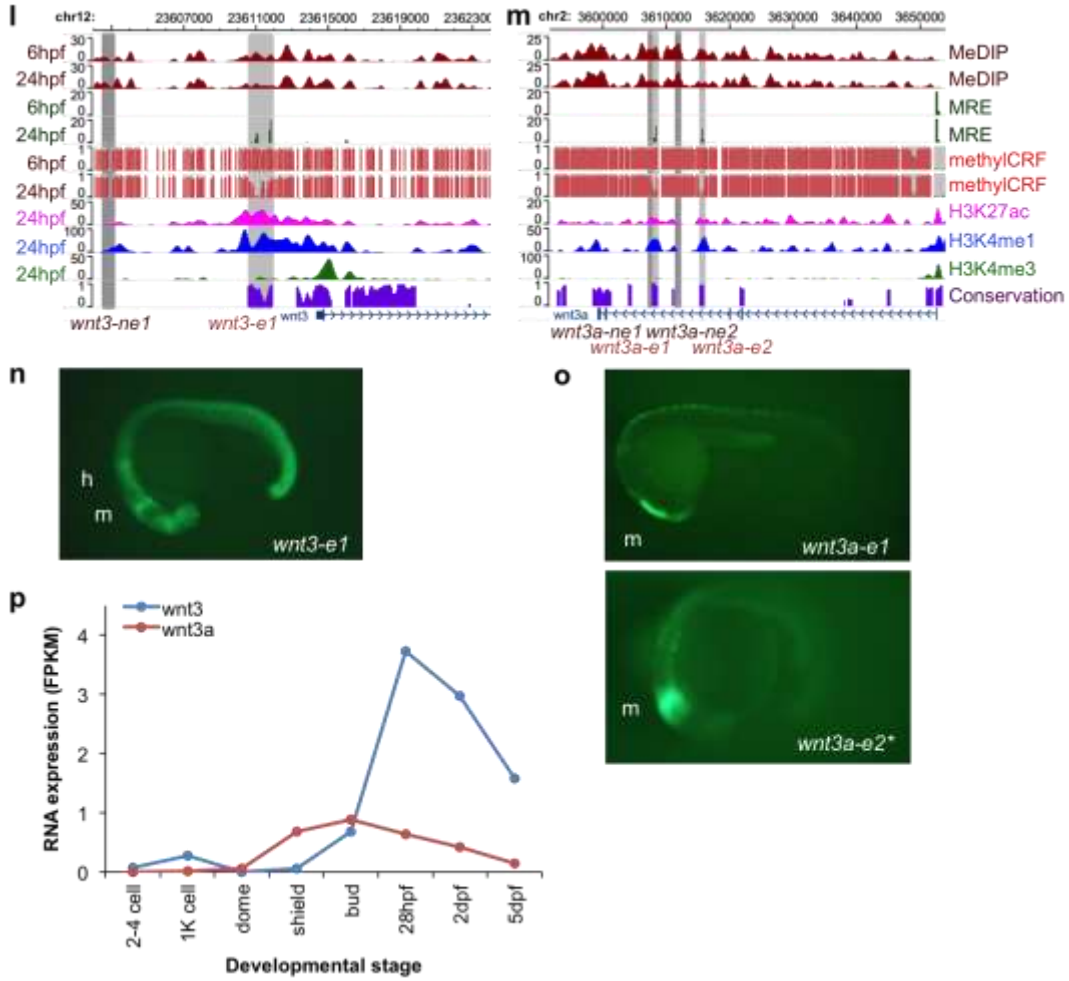

**Supplementary Figure 21. DNA methylation dynamics of previously reported earlier-stage DMRs in later embryogenesis stages.** (a) Heat map of earlier-stage DMRs' DNA methylation levels measured by either WGBS or methylCRF. Left panel: published WGBS data were used to re-draw the heat map of Figure 3A in Potok et al. (2013). Right panel: average DNA methylation in each earlier-stage DMR was calculated for six developmental stages in our study and plotted as a heat map. (b) A weighted Venn diagram of the overlap between earlier-stage DMRs previously reported and dsDMRs identified in our study. 431 earlier-stage DMRs were overlapped with dsDMRs by at least 50%. (c) Heat map of DNA methylation levels of the 431 overlapping DMRs.

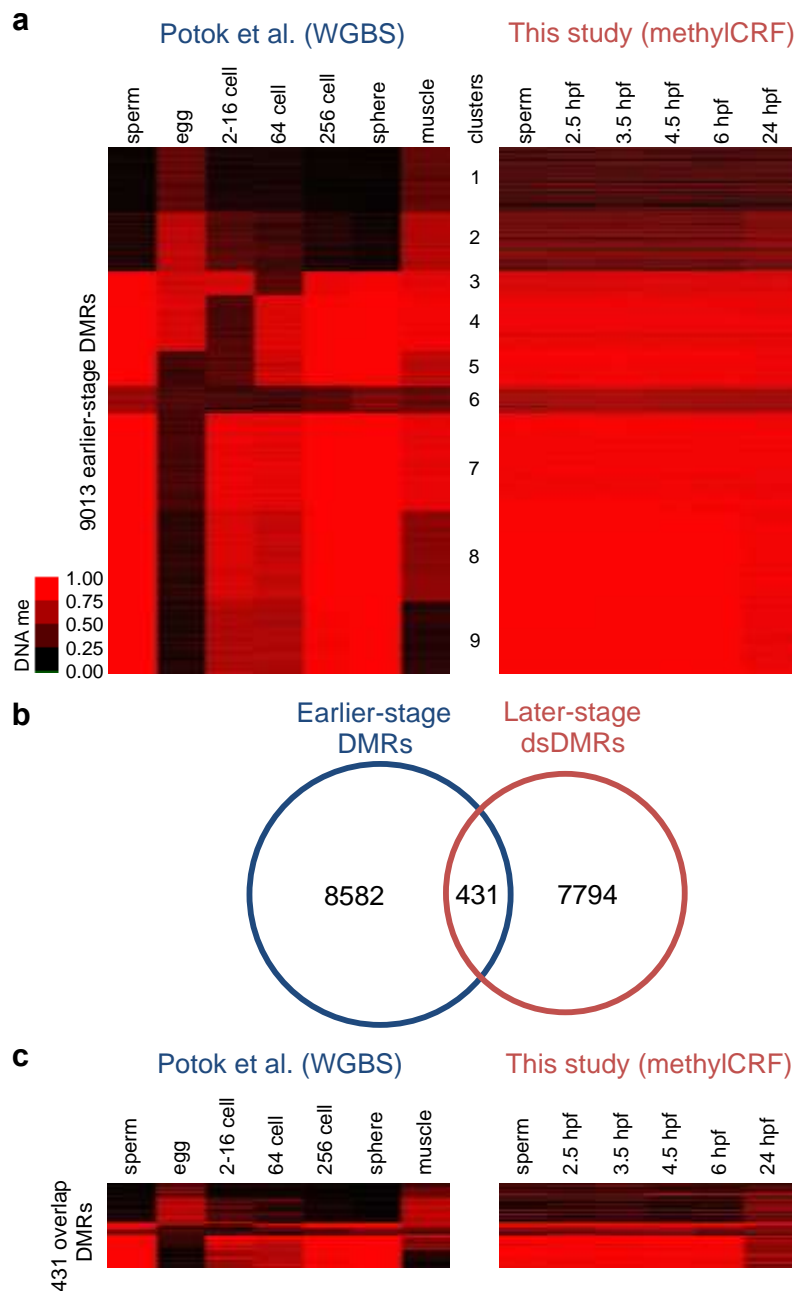

**Supplementary Figure 22.** Expression of *tet* genes. **(a)** Expression profiles of 3 zebrafish *tet* genes across different developmental stages. **(b)** DNA methylation levels of dsDMRs are inversely correlated with *tet* expression. Each *tet* expression was normalized to the expression level in 28 hpf. DNA methylation levels are average of 1261 dsDMRs in each stage and error bars indicate the standard deviations.

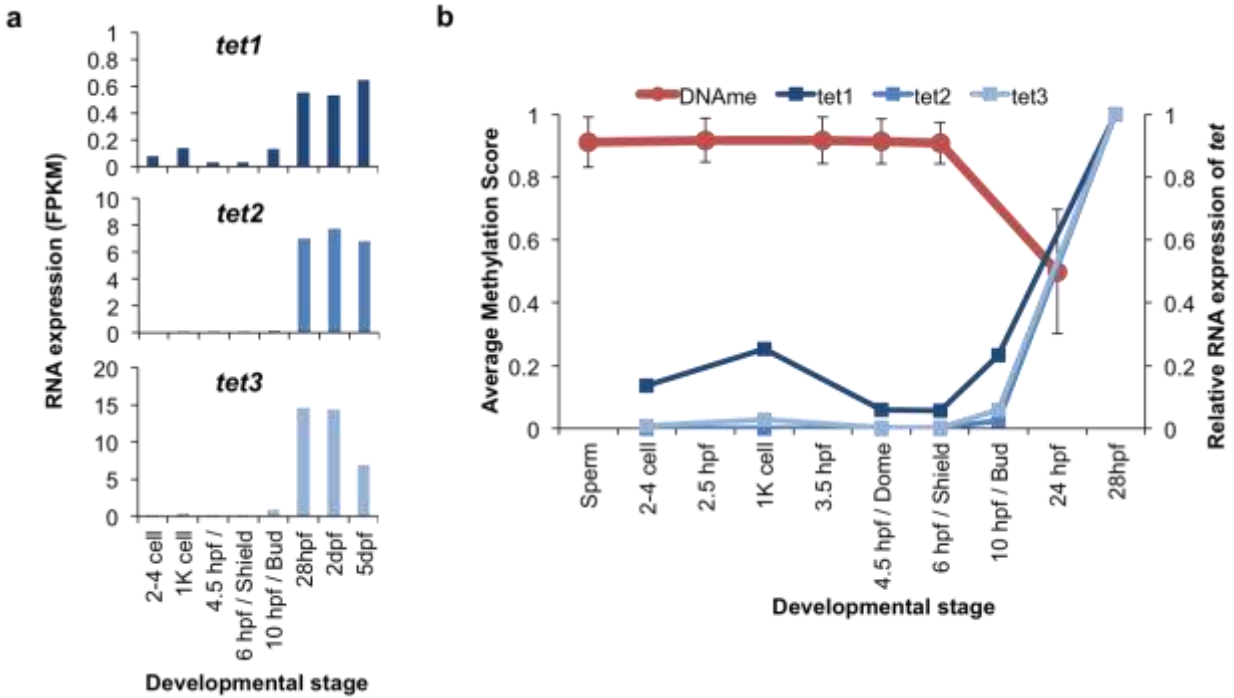

**Supplementary Figure 23.** A weighted Venn diagram of the overlap between dsDMR enhancers and PDREs. 1261 dsDMRs used here were hypomethylated in 24 hpf embryos in the comparison between 6 hpf and 24 hpf. 23419 PDREs used here were 24 hpf-specific. 548 dsDMR enhancers were overlapped with PDREs by at least 50%.

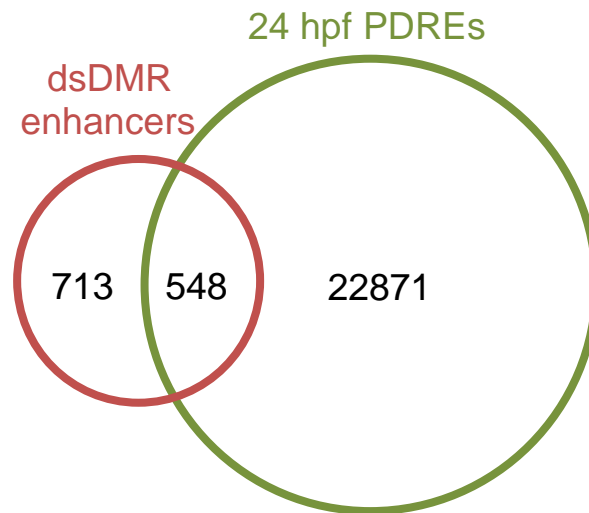

**SUPPLEMENTARY TABLES****Supplementary Table 1.** Statistics for methylome sequencing across developmental stages.

|         | MeDIP-seq          |                      |                  |              | MRE-seq     |               |                  |              |
|---------|--------------------|----------------------|------------------|--------------|-------------|---------------|------------------|--------------|
|         | Total Paired Reads | Paired Reads Aligned | Alignment Rate % | CpGs Covered | Total Reads | Reads Aligned | Alignment Rate % | CpGs Covered |
| sperm   | 52520004           | 47698369             | 90.8%            | 18966824     | 37317638    | 35534718      | 95.2%            | 325217       |
| 2.5hpf  | 104923032          | 95684765             | 91.2%            | 21001306     | 57487942    | 51431429      | 89.5%            | 338279       |
| 3.5hpf  | 232029287          | 205771559            | 88.7%            | 22192692     | 79539654    | 68547095      | 86.2%            | 327683       |
| 4.5hpf  | 51256278           | 46089089             | 89.9%            | 20167130     | 38327579    | 35894962      | 93.7%            | 333927       |
| 6hpf    | 44770396           | 40229015             | 89.9%            | 19493410     | 45953510    | 43954427      | 95.6%            | 335045       |
| 24hpf   | 53222976           | 48160879             | 90.5%            | 19519417     | 40977352    | 39423289      | 96.2%            | 447413       |
| Average | 89786996           | 80605613             | 90.2%            | 20223463     | 49933946    | 45797653      | 92.7%            | 351261       |
| Total   | 538721973          | 483633676            |                  |              | 299603675   | 274785920     |                  |              |

Supplementary Table 2. Complete list of the enriched GO terms based on GREAT analysis

| Ontology              | TermID     | TermName                                    | Rank | Raw p-value | Binomial overRegions |             |          | Observed regionHits | Genome fraction | RegionBin coverage | Hypergeometric overRegions |             |             |          |          | Observed genes | Total genes | Genes/total coverage | TermBin coverage | Genes    |          |                                                                                                                                                                                                                                                                                                                                                                                                                                                                                                                                                                                                                                                                                                                            |                                                                                                                                                                                                                                                                                                                                                                                                                                                                                                                                                                                                                                                                                                                                                                                                                        |
|-----------------------|------------|---------------------------------------------|------|-------------|----------------------|-------------|----------|---------------------|-----------------|--------------------|----------------------------|-------------|-------------|----------|----------|----------------|-------------|----------------------|------------------|----------|----------|----------------------------------------------------------------------------------------------------------------------------------------------------------------------------------------------------------------------------------------------------------------------------------------------------------------------------------------------------------------------------------------------------------------------------------------------------------------------------------------------------------------------------------------------------------------------------------------------------------------------------------------------------------------------------------------------------------------------------|------------------------------------------------------------------------------------------------------------------------------------------------------------------------------------------------------------------------------------------------------------------------------------------------------------------------------------------------------------------------------------------------------------------------------------------------------------------------------------------------------------------------------------------------------------------------------------------------------------------------------------------------------------------------------------------------------------------------------------------------------------------------------------------------------------------------|
|                       |            |                                             |      |             | FDR/q-value          | FDR/q-value | Expected |                     |                 |                    | p-value                    | FDR/q-value | FDR/q-value | Expected |          |                |             |                      |                  |          |          |                                                                                                                                                                                                                                                                                                                                                                                                                                                                                                                                                                                                                                                                                                                            |                                                                                                                                                                                                                                                                                                                                                                                                                                                                                                                                                                                                                                                                                                                                                                                                                        |
| GO:BiologicalFunction | GO:005007  | Fibroblast growth factor receptor activity  | 8    | 1.83E-11    | 3.10E-08             | 3.87E-09    | 1.11E+01 | 1.35E+00            | 15              | 3.70E-02           | 1.12E-01                   | 9           | 9.78E-06    | 1.66E-02 | 1.84E-03 | 1.00E+01       | 4.98E-01    | 5                    | 3.44E-03         | 1.00E+00 | 15       | gfr1a, gfr1b, gfr2, gfr3, gfr4, gfr5, gfr6, gfr7, gfr8, gfr9, gfr10, gfr11, gfr12, gfr13, gfr14, gfr15, gfr16, gfr17, gfr18, gfr19, gfr20, gfr21, gfr22, gfr23, gfr24, gfr25, gfr26, gfr27, gfr28, gfr29, gfr30, gfr31, gfr32, gfr33, gfr34, gfr35, gfr36, gfr37, gfr38, gfr39, gfr40, gfr41, gfr42, gfr43, gfr44, gfr45, gfr46, gfr47, gfr48, gfr49, gfr50, gfr51, gfr52, gfr53, gfr54, gfr55, gfr56, gfr57, gfr58, gfr59, gfr60, gfr61, gfr62, gfr63, gfr64, gfr65, gfr66, gfr67, gfr68, gfr69, gfr70, gfr71, gfr72, gfr73, gfr74, gfr75, gfr76, gfr77, gfr78, gfr79, gfr80, gfr81, gfr82, gfr83, gfr84, gfr85, gfr86, gfr87, gfr88, gfr89, gfr90, gfr91, gfr92, gfr93, gfr94, gfr95, gfr96, gfr97, gfr98, gfr99, gfr100 |                                                                                                                                                                                                                                                                                                                                                                                                                                                                                                                                                                                                                                                                                                                                                                                                                        |
| GO:BiologicalProcess  | GO:0007420 | brain development                           | 21   | 5.75E-31    | 2.07E-27             | 9.85E-29    | 3.05E+00 | 4.66E+01            | 142             | 3.70E-02           | 1.12E-01                   | 8           | 7.31E-27    | 2.62E-22 | 3.29E-24 | 3.99E+00       | 1.83E+01    | 73                   | 184              | 5.05E-02 | 3.97E-01 | 184                                                                                                                                                                                                                                                                                                                                                                                                                                                                                                                                                                                                                                                                                                                        | gata1, gata2, gata3, gata4, gata5, gata6, gata7, gata8, gata9, gata10, gata11, gata12, gata13, gata14, gata15, gata16, gata17, gata18, gata19, gata20, gata21, gata22, gata23, gata24, gata25, gata26, gata27, gata28, gata29, gata30, gata31, gata32, gata33, gata34, gata35, gata36, gata37, gata38, gata39, gata40, gata41, gata42, gata43, gata44, gata45, gata46, gata47, gata48, gata49, gata50, gata51, gata52, gata53, gata54, gata55, gata56, gata57, gata58, gata59, gata60, gata61, gata62, gata63, gata64, gata65, gata66, gata67, gata68, gata69, gata70, gata71, gata72, gata73, gata74, gata75, gata76, gata77, gata78, gata79, gata80, gata81, gata82, gata83, gata84, gata85, gata86, gata87, gata88, gata89, gata90, gata91, gata92, gata93, gata94, gata95, gata96, gata97, gata98, gata99, gata100 |
| GO:BiologicalProcess  | GO:0007417 | central nervous system development          | 23   | 6.09E-29    | 2.19E-25             | 9.52E-27    | 2.74E+00 | 5.65E+01            | 155             | 4.48E-02           | 1.23E-01                   | 11          | 5.64E-26    | 2.03E-22 | 1.84E-23 | 3.51E+00       | 2.36E+01    | 83                   | 237              | 5.72E-02 | 3.50E-01 | 237                                                                                                                                                                                                                                                                                                                                                                                                                                                                                                                                                                                                                                                                                                                        | gata1, gata2, gata3, gata4, gata5, gata6, gata7, gata8, gata9, gata10, gata11, gata12, gata13, gata14, gata15, gata16, gata17, gata18, gata19, gata20, gata21, gata22, gata23, gata24, gata25, gata26, gata27, gata28, gata29, gata30, gata31, gata32, gata33, gata34, gata35, gata36, gata37, gata38, gata39, gata40, gata41, gata42, gata43, gata44, gata45, gata46, gata47, gata48, gata49, gata50, gata51, gata52, gata53, gata54, gata55, gata56, gata57, gata58, gata59, gata60, gata61, gata62, gata63, gata64, gata65, gata66, gata67, gata68, gata69, gata70, gata71, gata72, gata73, gata74, gata75, gata76, gata77, gata78, gata79, gata80, gata81, gata82, gata83, gata84, gata85, gata86, gata87, gata88, gata89, gata90, gata91, gata92, gata93, gata94, gata95, gata96, gata97, gata98, gata99, gata100 |
| GO:BiologicalProcess  | GO:0001654 | eye development                             | 25   | 3.30E-25    | 1.19E-21             | 4.75E-23    | 3.26E+00 | 3.22E+01            | 105             | 2.55E-02           | 8.33E-02                   | 49          | 7.19E-10    | 2.59E-06 | 5.28E-08 | 2.64E+00       | 1.70E+01    | 45                   | 171              | 3.10E-02 | 2.63E-01 | 171                                                                                                                                                                                                                                                                                                                                                                                                                                                                                                                                                                                                                                                                                                                        | gata1, gata2, gata3, gata4, gata5, gata6, gata7, gata8, gata9, gata10, gata11, gata12, gata13, gata14, gata15, gata16, gata17, gata18, gata19, gata20, gata21, gata22, gata23, gata24, gata25, gata26, gata27, gata28, gata29, gata30, gata31, gata32, gata33, gata34, gata35, gata36, gata37, gata38, gata39, gata40, gata41, gata42, gata43, gata44, gata45, gata46, gata47, gata48, gata49, gata50, gata51, gata52, gata53, gata54, gata55, gata56, gata57, gata58, gata59, gata60, gata61, gata62, gata63, gata64, gata65, gata66, gata67, gata68, gata69, gata70, gata71, gata72, gata73, gata74, gata75, gata76, gata77, gata78, gata79, gata80, gata81, gata82, gata83, gata84, gata85, gata86, gata87, gata88, gata89, gata90, gata91, gata92, gata93, gata94, gata95, gata96, gata97, gata98, gata99, gata100 |
| GO:BiologicalProcess  | GO:0007423 | sensory organ development                   | 31   | 5.48E-23    | 1.97E-19             | 6.36E-21    | 2.68E+00 | 4.73E+01            | 127             | 3.75E-02           | 1.01E-01                   | 45          | 4.13E-11    | 1.49E-07 | 3.30E-09 | 2.46E+00       | 2.40E+01    | 59                   | 241              | 4.06E-02 | 2.45E-01 | 241                                                                                                                                                                                                                                                                                                                                                                                                                                                                                                                                                                                                                                                                                                                        | gata1, gata2, gata3, gata4, gata5, gata6, gata7, gata8, gata9, gata10, gata11, gata12, gata13, gata14, gata15, gata16, gata17, gata18, gata19, gata20, gata21, gata22, gata23, gata24, gata25, gata26, gata27, gata28, gata29, gata30, gata31, gata32, gata33, gata34, gata35, gata36, gata37, gata38, gata39, gata40, gata41, gata42, gata43, gata44, gata45, gata46, gata47, gata48, gata49, gata50, gata51, gata52, gata53, gata54, gata55, gata56, gata57, gata58, gata59, gata60, gata61, gata62, gata63, gata64, gata65, gata66, gata67, gata68, gata69, gata70, gata71, gata72, gata73, gata74, gata75, gata76, gata77, gata78, gata79, gata80, gata81, gata82, gata83, gata84, gata85, gata86, gata87, gata88, gata89, gata90, gata91, gata92, gata93, gata94, gata95, gata96, gata97, gata98, gata99, gata100 |
| GO:BiologicalProcess  | GO:0049310 | camera type eye development                 | 34   | 1.46E-21    | 5.26E-18             | 1.55E-19    | 3.45E+00 | 2.41E+01            | 83              | 1.91E-02           | 6.58E-02                   | 65          | 3.96E-07    | 1.42E-03 | 2.19E-05 | 2.53E+00       | 1.31E+01    | 33                   | 131              | 2.27E-02 | 2.52E-01 | 131                                                                                                                                                                                                                                                                                                                                                                                                                                                                                                                                                                                                                                                                                                                        | gata1, gata2, gata3, gata4, gata5, gata6, gata7, gata8, gata9, gata10, gata11, gata12, gata13, gata14, gata15, gata16, gata17, gata18, gata19, gata20, gata21, gata22, gata23, gata24, gata25, gata26, gata27, gata28, gata29, gata30, gata31, gata32, gata33, gata34, gata35, gata36, gata37, gata38, gata39, gata40, gata41, gata42, gata43, gata44, gata45, gata46, gata47, gata48, gata49, gata50, gata51, gata52, gata53, gata54, gata55, gata56, gata57, gata58, gata59, gata60, gata61, gata62, gata63, gata64, gata65, gata66, gata67, gata68, gata69, gata70, gata71, gata72, gata73, gata74, gata75, gata76, gata77, gata78, gata79, gata80, gata81, gata82, gata83, gata84, gata85, gata86, gata87, gata88, gata89, gata90, gata91, gata92, gata93, gata94, gata95, gata96, gata97, gata98, gata99, gata100 |
| GO:BiologicalProcess  | GO:0021915 | neuronal cell development                   | 35   | 2.17E-21    | 7.79E-18             | 2.23E-19    | 4.47E+00 | 1.37E+01            | 61              | 1.08E-02           | 4.84E-02                   | 33          | 8.46E-14    | 3.04E-10 | 9.22E-12 | 5.22E+00       | 4.98E+00    | 26                   | 50               | 1.79E-02 | 5.20E-01 | 50                                                                                                                                                                                                                                                                                                                                                                                                                                                                                                                                                                                                                                                                                                                         | gata1, gata2, gata3, gata4, gata5, gata6, gata7, gata8, gata9, gata10, gata11, gata12, gata13, gata14, gata15, gata16, gata17, gata18, gata19, gata20, gata21, gata22, gata23, gata24, gata25, gata26, gata27, gata28, gata29, gata30, gata31, gata32, gata33, gata34, gata35, gata36, gata37, gata38, gata39, gata40, gata41, gata42, gata43, gata44, gata45, gata46, gata47, gata48, gata49, gata50, gata51, gata52, gata53, gata54, gata55, gata56, gata57, gata58, gata59, gata60, gata61, gata62, gata63, gata64, gata65, gata66, gata67, gata68, gata69, gata70, gata71, gata72, gata73, gata74, gata75, gata76, gata77, gata78, gata79, gata80, gata81, gata82, gata83, gata84, gata85, gata86, gata87, gata88, gata89, gata90, gata91, gata92, gata93, gata94, gata95, gata96, gata97, gata98, gata99, gata100 |
| GO:BiologicalProcess  | GO:0048532 | eye morphogenesis                           | 36   | 7.44E-21    | 2.68E-17             | 7.44E-19    | 3.71E+00 | 1.97E+01            | 73              | 1.56E-02           | 5.79E-02                   | 50          | 5.79E-09    | 2.08E-05 | 4.16E-07 | 3.30E+00       | 8.47E+00    | 28                   | 85               | 1.93E-02 | 3.29E-01 | 85                                                                                                                                                                                                                                                                                                                                                                                                                                                                                                                                                                                                                                                                                                                         | gata1, gata2, gata3, gata4, gata5, gata6, gata7, gata8, gata9, gata10, gata11, gata12, gata13, gata14, gata15, gata16, gata17, gata18, gata19, gata20, gata21, gata22, gata23, gata24, gata25, gata26, gata27, gata28, gata29, gata30, gata31, gata32, gata33, gata34, gata35, gata36, gata37, gata38, gata39, gata40, gata41, gata42, gata43, gata44, gata45, gata46, gata47, gata48, gata49, gata50, gata51, gata52, gata53, gata54, gata55, gata56, gata57, gata58, gata59, gata60, gata61, gata62, gata63, gata64, gata65, gata66, gata67, gata68, gata69, gata70, gata71, gata72, gata73, gata74, gata75, gata76, gata77, gata78, gata79, gata80, gata81, gata82, gata83, gata84, gata85, gata86, gata87, gata88, gata89, gata90, gata91, gata92, gata93, gata94, gata95, gata96, gata97, gata98, gata99, gata100 |
| GO:BiologicalProcess  | GO:0039092 | hindbrain development                       | 37   | 2.95E-19    | 1.06E-15             | 2.86E-17    | 4.09E+00 | 1.47E+01            | 60              | 1.16E-02           | 4.76E-02                   | 38          | 2.46E-12    | 8.84E-09 | 2.33E-10 | 4.51E+00       | 5.98E+00    | 27                   | 60               | 1.86E-02 | 4.50E-01 | 60                                                                                                                                                                                                                                                                                                                                                                                                                                                                                                                                                                                                                                                                                                                         | gata1, gata2, gata3, gata4, gata5, gata6, gata7, gata8, gata9, gata10, gata11, gata12, gata13, gata14, gata15, gata16, gata17, gata18, gata19, gata20, gata21, gata22, gata23, gata24, gata25, gata26, gata27, gata28, gata29, gata30, gata31, gata32, gata33, gata34, gata35, gata36, gata37, gata38, gata39, gata40, gata41, gata42, gata43, gata44, gata45, gata46, gata47, gata48, gata49, gata50, gata51, gata52, gata53, gata54, gata55, gata56, gata57, gata58, gata59, gata60, gata61, gata62, gata63, gata64, gata65, gata66, gata67, gata68, gata69, gata70, gata71, gata72, gata73, gata74, gata75, gata76, gata77, gata78, gata79, gata80, gata81, gata82, gata83, gata84, gata85, gata86, gata87, gata88, gata89, gata90, gata91, gata92, gata93, gata94, gata95, gata96, gata97, gata98, gata99, gata100 |
| GO:BiologicalProcess  | GO:0043009 | chordate embryonic development              | 40   | 1.73E-17    | 6.23E-14             | 1.56E-15    | 2.57E+00 | 4.01E+01            | 103             | 3.18E-02           | 8.17E-02                   | 29          | 1.93E-15    | 6.93E-12 | 2.39E-13 | 3.30E+00       | 1.57E+01    | 52                   | 158              | 3.58E-02 | 3.29E-01 | 158                                                                                                                                                                                                                                                                                                                                                                                                                                                                                                                                                                                                                                                                                                                        | gata1, gata2, gata3, gata4, gata5, gata6, gata7, gata8, gata9, gata10, gata11, gata12, gata13, gata14, gata15, gata16, gata17, gata18, gata19, gata20, gata21, gata22, gata23, gata24, gata25, gata26, gata27, gata28, gata29, gata30, gata31, gata32, gata33, gata34, gata35, gata36, gata37, gata38, gata39, gata40, gata41, gata42, gata43, gata44, gata45, gata46, gata47, gata48, gata49, gata50, gata51, gata52, gata53, gata54, gata55, gata56, gata57, gata58, gata59, gata60, gata61, gata62, gata63, gata64, gata65, gata66, gata67, gata68, gata69, gata70, gata71, gata72, gata73, gata74, gata75, gata76, gata77, gata78, gata79, gata80, gata81, gata82, gata83, gata84, gata85, gata86, gata87, gata88, gata89, gata90, gata91, gata92, gata93, gata94, gata95, gata96, gata97, gata98, gata99, gata100 |
| GO:BiologicalProcess  | GO:0009792 | embryo development hindbrain birth hatching | 40   | 1.73E-17    | 6.23E-14             | 1.56E-15    | 2.57E+00 | 4.01E+01            | 103             | 3.18E-02           | 8.17E-02                   | 29          | 1.93E-15    | 6.93E-12 | 2.39E-13 | 3.30E+00       | 1.57E+01    | 52                   | 158              | 3.58E-02 | 3.29E-01 | 158                                                                                                                                                                                                                                                                                                                                                                                                                                                                                                                                                                                                                                                                                                                        | gata1, gata2, gata3, gata4, gata5, gata6, gata7, gata8, gata9, gata10, gata11, gata12, gata13, gata14, gata15, gata16, gata17, gata18, gata19, gata20, gata21, gata22, gata23, gata24, gata25, gata26, gata27, gata28, gata29, gata30, gata31, gata32, gata33, gata34, gata35, gata36, gata37, gata38, gata39, gata40, gata41, gata42, gata43, gata44, gata45, gata46, gata47, gata48, gata49, gata50, gata51, gata52, gata53, gata54, gata55, gata56, gata57, gata58, gata59, gata60, gata61, gata62, gata63, gata64, gata65, gata66, gata67, gata68, gata69, gata70, gata71, gata72, gata73, gata74, gata75, gata76, gata77, gata78, gata79, gata80, gata81, gata82, gata83, gata84, gata85, gata86, gata87, gata88, gata89, gata90, gata91, gata92, gata93, gata94, gata95, gata96, gata97, gata98, gata99, gata100 |
| GO:BiologicalProcess  | GO:0048593 | camera type eye morphogenesis               | 43   | 1.50E-16    | 5.39E-13             | 1.25E-14    | 4.31E+00 | 1.11E+01            | 48              | 8.02E-03           | 3.81E-02                   | 83          | 1.82E-06    | 6.55E-03 | 7.89E-05 | 3.41E+00       | 5.28E+00    | 18                   | 53               | 1.24E-02 | 3.40E-01 | 53                                                                                                                                                                                                                                                                                                                                                                                                                                                                                                                                                                                                                                                                                                                         | gata1, gata2, gata3, gata4, gata5, gata6, gata7, gata8, gata9, gata10, gata11, gata12, gata13, gata14, gata15, gata16, gata17, gata18, gata19, gata20, gata21, gata22, gata23, gata24, gata25, gata26, gata27, gata28, gata29, gata30, gata31, gata32, gata33, gata34, gata35, gata36, gata37, gata38, gata39, gata40, gata41, gata42, gata43, gata44, gata45, gata46, gata47, gata48, gata49, gata50, gata51, gata52, gata53, gata54, gata55, gata56, gata57, gata58, gata59, gata60, gata61, gata62, gata63, gata64, gata65, gata66, gata67, gata68, gata69, gata70, gata71, gata72, gata73, gata74, gata75, gata76, gata77, gata78, gata79, gata80, gata81, gata82, gata83, gata84, gata85, gata86, gata87, gata88, gata89, gata90, gata91, gata92, gata93, gata94, gata95, gata96, gata97, gata98, gata99, gata100 |
| GO:BiologicalProcess  | GO:0007219 | notch signaling pathway                     | 44   | 6.13E-15    | 2.21E-11             | 5.01E-13    | 6.07E+00 | 5.11E+00            | 31              | 4.05E-03           | 2.46E-02                   | 59          | 1.47E-07    | 5.31E-04 | 8.99E-06 | 4.34E+00       | 3.69E+00    | 16                   | 37               | 1.10E-02 | 4.32E-01 | 37                                                                                                                                                                                                                                                                                                                                                                                                                                                                                                                                                                                                                                                                                                                         | gata1, gata2, gata3, gata4, gata5, gata6, gata7, gata8, gata9, gata10, gata11, gata12, gata13, gata14, gata15, gata16, gata17, gata18, gata19, gata20, gata21, gata22, gata23, gata24, gata25, gata26, gata27, gata28, gata29, gata30, gata31, gata32, gata33, gata34, gata35, gata36, gata37, gata38, gata39, gata40, gata41, gata42, gata43, gata44, gata45, gata46, gata47, gata48, gata49, gata50, gata51, gata52, gata53, gata54, gata55, gata56, gata57, gata58, gata59, gata60, gata61, gata62, gata63, gata64, gata65, gata66, gata67, gata68, gata69, gata70, gata71, gata72, gata73, gata74, gata75, gata76, gata77, gata78, gata79, gata80, gata81, gata82, gata83, gata84, gata85, gata86, gata87, gata88, gata89, gata90, gata91, gata92, gata93, gata94, gata95, gata96, gata97, gata98, gata99, gata100 |
| GO:BiologicalProcess  | GO:0048048 | embryonic eye morphogenesis                 | 45   | 8.42E-15    | 3.03E-11             | 6.73E-13    | 5.78E+00 | 5.54E+00            | 32              | 4.39E-03           | 2.54E-02                   | 84          | 2.32E-06    | 8.34E-03 | 9.93E-05 | 5.02E+00       | 2.19E+00    | 11                   | 22               | 7.58E-03 | 5.00E-01 | 22                                                                                                                                                                                                                                                                                                                                                                                                                                                                                                                                                                                                                                                                                                                         | gata1, gata2, gata3, gata4, gata5, gata6, gata7, gata8, gata9, gata10, gata11, gata12, gata13, gata14, gata15, gata16, gata17, gata18, gata19, gata20, gata21, gata22, gata23, gata24, gata25, gata26, gata27, gata28, gata29, gata30, gata31, gata32, gata33, gata34, gata35, gata36, gata37, gata38, gata39, gata40, gata41, gata42, gata43, gata44, gata45, gata46, gata47, gata48, gata49, gata50, gata51, gata52, gata53, gata54, gata55, gata56, gata57, gata58, gata59, gata60, gata61, gata62, gata63, gata64, gata65, gata66, gata67, gata68, gata69, gata70, gata71, gata72, gata73, gata74, gata75, gata76, gata77, gata78, gata79, gata80, gata81, gata82, gata83, gata84, gata85, gata86, gata87, gata88, gata89, gata90, gata91, gata92, gata93, gata94, gata95, gata96, gata97, gata98, gata99, gata100 |
| GO:BiologicalProcess  | GO:001331  | neuronal cell proliferation                 | 50   | 1.63E-12    | 5.86E-09             | 1.17E-10    | 8.30E+00 | 2.41E+01            | 20              | 1.91E-03           | 1.59E-02                   | 47          | 9.41E-11    | 3.30E-07 | 7.21E-09 | 1.00E+01       | 9.97E+01    | 10                   | 10               | 6.89E-03 | 1.00E+00 | 10                                                                                                                                                                                                                                                                                                                                                                                                                                                                                                                                                                                                                                                                                                                         | gata1, gata2, gata3, gata4, gata5, gata6, gata7, gata8, gata9, gata10, gata11, gata12, gata13, gata14, gata15, gata16, gata17, gata18, gata19, gata20, gata21, gata22, gata23, gata24, gata25, gata26, gata27, gata28, gata29, gata30, gata31, gata32, gata33, gata34, gata35, gata36, gata37, gata38, gata39, gata40, gata41, gata42, gata43, gata44, gata45, gata46, gata47, gata48, gata49, gata50, gata51, gata52, gata53, gata54, gata55, gata56, gata57, gata58, gata59, gata60, gata61, gata62, gata63, gata64, gata65, gata66, gata67, gata68, gata69, gata70, gata71, gata72, gata73, gata74, gata75, gata76, gata77, gata78, gata79, gata80, gata81, gata82, gata83, gata84, gata85, gata86, gata87, gata88, gata89, gata90, gata91, gata92, gata93, gata94, gata95, gata96, gata97, gata98, gata99, gata100 |
| GO:BiologicalProcess  | GO:0009953 | dorsal ventral pattern formation            | 51   | 2.17E-12    | 7.80E-09             | 1.53E-10    | 2.90E+00 | 2.00E+01            | 58              | 1.59E-02           | 4.60E-02                   | 37          | 2.17E-12    | 7.79E    |          |                |             |                      |                  |          |          |                                                                                                                                                                                                                                                                                                                                                                                                                                                                                                                                                                                                                                                                                                                            |                                                                                                                                                                                                                                                                                                                                                                                                                                                                                                                                                                                                                                                                                                                                                                                                                        |

Supplementary Table 2. Continued.

|            |                                       |    |          |          |          |          |          |    |          |          |     |          |          |          |          |          |   |    |          |          |                                                                                                                                                                                                                                                                                                                                                                                                                                                                                                                                                                                                                                                                                                                                                                                                                                                                                                                                                                                                                                                                                                                                                                                                                                                                                                                                                                                                                                                                                                                                                                                                                                                                                                                                                                                                                                                                                                                                                                                                                                                                                                                                                                                                                                                                                                                                                                                                                                                                                                                                                                                                                                                                                                                                                                                                                                                                                                                                                                                                                                                                                                                                                                                                                                                                                                                                                                                                                                                                                                                                                                                                                                                                                                                                                                                                                                                                                                                                                                                                                                                                                                                                                                                                                                                                                                                                                                                                                                                                                                                                                                                                                                                                                                                                                                                                                                                                                                                                                                                                                                                                                                                                                                                                                                                                                                                                                                                                                                                                                                                                                                                                                                                                                                                                                                                                 |
|------------|---------------------------------------|----|----------|----------|----------|----------|----------|----|----------|----------|-----|----------|----------|----------|----------|----------|---|----|----------|----------|-------------------------------------------------------------------------------------------------------------------------------------------------------------------------------------------------------------------------------------------------------------------------------------------------------------------------------------------------------------------------------------------------------------------------------------------------------------------------------------------------------------------------------------------------------------------------------------------------------------------------------------------------------------------------------------------------------------------------------------------------------------------------------------------------------------------------------------------------------------------------------------------------------------------------------------------------------------------------------------------------------------------------------------------------------------------------------------------------------------------------------------------------------------------------------------------------------------------------------------------------------------------------------------------------------------------------------------------------------------------------------------------------------------------------------------------------------------------------------------------------------------------------------------------------------------------------------------------------------------------------------------------------------------------------------------------------------------------------------------------------------------------------------------------------------------------------------------------------------------------------------------------------------------------------------------------------------------------------------------------------------------------------------------------------------------------------------------------------------------------------------------------------------------------------------------------------------------------------------------------------------------------------------------------------------------------------------------------------------------------------------------------------------------------------------------------------------------------------------------------------------------------------------------------------------------------------------------------------------------------------------------------------------------------------------------------------------------------------------------------------------------------------------------------------------------------------------------------------------------------------------------------------------------------------------------------------------------------------------------------------------------------------------------------------------------------------------------------------------------------------------------------------------------------------------------------------------------------------------------------------------------------------------------------------------------------------------------------------------------------------------------------------------------------------------------------------------------------------------------------------------------------------------------------------------------------------------------------------------------------------------------------------------------------------------------------------------------------------------------------------------------------------------------------------------------------------------------------------------------------------------------------------------------------------------------------------------------------------------------------------------------------------------------------------------------------------------------------------------------------------------------------------------------------------------------------------------------------------------------------------------------------------------------------------------------------------------------------------------------------------------------------------------------------------------------------------------------------------------------------------------------------------------------------------------------------------------------------------------------------------------------------------------------------------------------------------------------------------------------------------------------------------------------------------------------------------------------------------------------------------------------------------------------------------------------------------------------------------------------------------------------------------------------------------------------------------------------------------------------------------------------------------------------------------------------------------------------------------------------------------------------------------------------------------------------------------------------------------------------------------------------------------------------------------------------------------------------------------------------------------------------------------------------------------------------------------------------------------------------------------------------------------------------------------------------------------------------------------------------------------------------------------------------------------|
| GO:0051098 | regulation of cell fate specification | 97 | 1.60E-08 | 5.77E-05 | 5.95E-07 | 6.18E+00 | 2.95E+00 | 16 | 2.05E-03 | 1.27E-02 | 121 | 4.86E-05 | 1.75E-01 | 1.44E-03 | 5.85E+00 | 1.20E+00 | 7 | 12 | 4.82E-03 | 5.83E-01 | Rfx1,prdm1,sox19,sox19b,sox19c,sox19d,sox19e,sox19f,sox19g,sox19h,sox19i,sox19j,sox19k,sox19l,sox19m,sox19n,sox19o,sox19p,sox19q,sox19r,sox19s,sox19t,sox19u,sox19v,sox19w,sox19x,sox19y,sox19z,sox19aa,sox19ab,sox19ac,sox19ad,sox19ae,sox19af,sox19ag,sox19ah,sox19ai,sox19aj,sox19ak,sox19al,sox19am,sox19an,sox19ao,sox19ap,sox19aq,sox19ar,sox19as,sox19at,sox19au,sox19av,sox19aw,sox19ax,sox19ay,sox19az,sox19ba,sox19bb,sox19bc,sox19bd,sox19be,sox19bf,sox19bg,sox19bh,sox19bi,sox19bj,sox19bk,sox19bl,sox19bm,sox19bn,sox19bo,sox19bp,sox19bq,sox19br,sox19bs,sox19bt,sox19bu,sox19bv,sox19bw,sox19bx,sox19by,sox19bz,sox19ca,sox19cb,sox19cc,sox19cd,sox19ce,sox19cf,sox19cg,sox19ch,sox19ci,sox19cj,sox19ck,sox19cl,sox19cm,sox19cn,sox19co,sox19cp,sox19cq,sox19cr,sox19cs,sox19ct,sox19cu,sox19cv,sox19cw,sox19cx,sox19cy,sox19cz,sox19da,sox19db,sox19dc,sox19dd,sox19de,sox19df,sox19dg,sox19dh,sox19di,sox19dj,sox19dk,sox19dl,sox19dm,sox19dn,sox19do,sox19dp,sox19dq,sox19dr,sox19ds,sox19dt,sox19du,sox19dv,sox19dw,sox19dx,sox19dy,sox19dz,sox19ea,sox19eb,sox19ec,sox19ed,sox19ee,sox19ef,sox19eg,sox19eh,sox19ei,sox19ej,sox19ek,sox19el,sox19em,sox19en,sox19eo,sox19ep,sox19eq,sox19er,sox19es,sox19et,sox19eu,sox19ev,sox19ew,sox19ex,sox19ey,sox19ez,sox19fa,sox19fb,sox19fc,sox19fd,sox19fe,sox19ff,sox19fg,sox19fh,sox19fi,sox19fj,sox19fk,sox19fl,sox19fm,sox19fn,sox19fo,sox19fp,sox19fq,sox19fr,sox19fs,sox19ft,sox19fu,sox19fv,sox19fw,sox19fx,sox19fy,sox19fz,sox19ga,sox19gb,sox19gc,sox19gd,sox19ge,sox19gf,sox19gh,sox19gi,sox19gj,sox19gk,sox19gl,sox19gm,sox19gn,sox19go,sox19gp,sox19gq,sox19gr,sox19gs,sox19gt,sox19gu,sox19gv,sox19gw,sox19gx,sox19gy,sox19gz,sox19ha,sox19hb,sox19hc,sox19hd,sox19he,sox19hf,sox19hg,sox19hi,sox19hj,sox19hk,sox19hl,sox19hm,sox19hn,sox19ho,sox19hp,sox19hq,sox19hr,sox19hs,sox19ht,sox19hu,sox19hv,sox19hw,sox19hx,sox19hy,sox19hz,sox19ia,sox19ib,sox19ic,sox19id,sox19ie,sox19if,sox19ig,sox19ih,sox19ii,sox19ij,sox19ik,sox19il,sox19im,sox19in,sox19io,sox19ip,sox19iq,sox19ir,sox19is,sox19it,sox19iu,sox19iv,sox19iw,sox19ix,sox19iy,sox19iz,sox19ja,sox19jb,sox19jc,sox19jd,sox19je,sox19jf,sox19jg,sox19jh,sox19ji,sox19jj,sox19jk,sox19jl,sox19jm,sox19jn,sox19jo,sox19jp,sox19jq,sox19jr,sox19js,sox19jt,sox19ju,sox19jv,sox19jw,sox19jx,sox19jy,sox19jz,sox19ka,sox19kb,sox19kc,sox19kd,sox19ke,sox19kf,sox19kg,sox19kh,sox19ki,sox19kj,sox19kk,sox19kl,sox19km,sox19kn,sox19ko,sox19kp,sox19kq,sox19kr,sox19ks,sox19kt,sox19ku,sox19kv,sox19kw,sox19kx,sox19ky,sox19kz,sox19la,sox19lb,sox19lc,sox19ld,sox19le,sox19lf,sox19lg,sox19lh,sox19li,sox19lj,sox19lk,sox19ll,sox19lm,sox19ln,sox19lo,sox19lp,sox19lq,sox19lr,sox19ls,sox19lt,sox19lu,sox19lv,sox19lw,sox19lx,sox19ly,sox19lz,sox19ma,sox19mb,sox19mc,sox19md,sox19me,sox19mf,sox19mg,sox19mh,sox19mi,sox19mj,sox19mk,sox19ml,sox19mn,sox19mo,sox19mp,sox19mq,sox19mr,sox19ms,sox19mt,sox19mu,sox19mv,sox19mw,sox19mx,sox19my,sox19mz,sox19na,sox19nb,sox19nc,sox19nd,sox19ne,sox19nf,sox19ng,sox19nh,sox19ni,sox19nj,sox19nk,sox19nl,sox19nm,sox19nn,sox19no,sox19np,sox19nq,sox19nr,sox19ns,sox19nt,sox19nu,sox19nv,sox19nw,sox19nx,sox19ny,sox19nz,sox19oa,sox19ob,sox19oc,sox19od,sox19oe,sox19of,sox19og,sox19oh,sox19oi,sox19oj,sox19ok,sox19ol,sox19om,sox19on,sox19oo,sox19op,sox19oq,sox19or,sox19os,sox19ot,sox19ou,sox19ov,sox19ow,sox19ox,sox19oy,sox19oz,sox19pa,sox19pb,sox19pc,sox19pd,sox19pe,sox19pf,sox19pg,sox19ph,sox19pi,sox19pj,sox19pk,sox19pl,sox19pm,sox19pn,sox19po,sox19pp,sox19pq,sox19pr,sox19ps,sox19pt,sox19pu,sox19pv,sox19pw,sox19px,sox19py,sox19pz,sox19qa,sox19qb,sox19qc,sox19qd,sox19qe,sox19qf,sox19qg,sox19qh,sox19qi,sox19qj,sox19qk,sox19ql,sox19qm,sox19qn,sox19qo,sox19qp,sox19qq,sox19qr,sox19qs,sox19qt,sox19qu,sox19qv,sox19qw,sox19qx,sox19qy,sox19qz,sox19ra,sox19rb,sox19rc,sox19rd,sox19re,sox19rf,sox19rg,sox19rh,sox19ri,sox19rj,sox19rk,sox19rl,sox19rm,sox19rn,sox19ro,sox19rp,sox19rq,sox19rr,sox19rs,sox19rt,sox19ru,sox19rv,sox19rw,sox19rx,sox19ry,sox19rz,sox19sa,sox19sb,sox19sc,sox19sd,sox19se,sox19sf,sox19sg,sox19sh,sox19si,sox19sj,sox19sk,sox19sl,sox19sm,sox19sn,sox19so,sox19sp,sox19sq,sox19sr,sox19ss,sox19st,sox19su,sox19sv,sox19sw,sox19sx,sox19sy,sox19sz,sox19ta,sox19tb,sox19tc,sox19td,sox19te,sox19tf,sox19tg,sox19th,sox19ti,sox19tj,sox19tk,sox19tl,sox19tm,sox19tn,sox19to,sox19tp,sox19tq,sox19tr,sox19ts,sox19tt,sox19tu,sox19tv,sox19tw,sox19tx,sox19ty,sox19tz,sox19ua,sox19ub,sox19uc,sox19ud,sox19ue,sox19uf,sox19ug,sox19uh,sox19ui,sox19uj,sox19uk,sox19ul,sox19um,sox19un,sox19uo,sox19up,sox19uq,sox19ur,sox19us,sox19ut,sox19uu,sox19uv,sox19uw,sox19ux,sox19uy,sox19uz,sox19va,sox19vb,sox19vc,sox19vd,sox19ve,sox19vf,sox19vg,sox19vh,sox19vi,sox19vj,sox19vk,sox19vl,sox19vm,sox19vn,sox19vo,sox19vp,sox19vq,sox19vr,sox19vs,sox19vt,sox19vu,sox19vw,sox19vx,sox19vy,sox19vz,sox19wa,sox19wb,sox19wc,sox19wd,sox19we,sox19wf,sox19wg,sox19wh,sox19wi,sox19wj,sox19wk,sox19wl,sox19wm,sox19wn,sox19wo,sox19wp,sox19wq,sox19wr,sox19ws,sox19wt,sox19wu,sox19wv,sox19ww,sox19wx,sox19wy,sox19wz,sox19xa,sox19xb,sox19xc,sox19xd,sox19xe,sox19xf,sox19xg,sox19xh,sox19xi,sox19xj,sox19xk,sox19xl,sox19xm,sox19xn,sox19xo,sox19xp,sox19xq,sox19xr,sox19xs,sox19xt,sox19xu,sox19xv,sox19xw,sox19xx,sox19xy,sox19xz,sox19ya,sox19yb,sox19yc,sox19yd,sox19ye,sox19yf,sox19yg,sox19yh,sox19yi,sox19yj,sox19yk,sox19yl,sox19ym,sox19yn,sox19yo,sox19yp,sox19yq,sox19yr,sox19ys,sox19yt,sox19yu,sox19yv,sox19yw,sox19yx,sox19yy,sox19yz,sox19za,sox19zb,sox19zc,sox19zd,sox19ze,sox19zf,sox19zg,sox19zh,sox19zi,sox19zj,sox19zk,sox19zl,sox19zm,sox19zn,sox19zo,sox19zp,sox19zq,sox19zr,sox19zs,sox19zt,sox19zu,sox19zv,sox19zw,sox19zx,sox19zy,sox19zz |
|------------|---------------------------------------|----|----------|----------|----------|----------|----------|----|----------|----------|-----|----------|----------|----------|----------|----------|---|----|----------|----------|-------------------------------------------------------------------------------------------------------------------------------------------------------------------------------------------------------------------------------------------------------------------------------------------------------------------------------------------------------------------------------------------------------------------------------------------------------------------------------------------------------------------------------------------------------------------------------------------------------------------------------------------------------------------------------------------------------------------------------------------------------------------------------------------------------------------------------------------------------------------------------------------------------------------------------------------------------------------------------------------------------------------------------------------------------------------------------------------------------------------------------------------------------------------------------------------------------------------------------------------------------------------------------------------------------------------------------------------------------------------------------------------------------------------------------------------------------------------------------------------------------------------------------------------------------------------------------------------------------------------------------------------------------------------------------------------------------------------------------------------------------------------------------------------------------------------------------------------------------------------------------------------------------------------------------------------------------------------------------------------------------------------------------------------------------------------------------------------------------------------------------------------------------------------------------------------------------------------------------------------------------------------------------------------------------------------------------------------------------------------------------------------------------------------------------------------------------------------------------------------------------------------------------------------------------------------------------------------------------------------------------------------------------------------------------------------------------------------------------------------------------------------------------------------------------------------------------------------------------------------------------------------------------------------------------------------------------------------------------------------------------------------------------------------------------------------------------------------------------------------------------------------------------------------------------------------------------------------------------------------------------------------------------------------------------------------------------------------------------------------------------------------------------------------------------------------------------------------------------------------------------------------------------------------------------------------------------------------------------------------------------------------------------------------------------------------------------------------------------------------------------------------------------------------------------------------------------------------------------------------------------------------------------------------------------------------------------------------------------------------------------------------------------------------------------------------------------------------------------------------------------------------------------------------------------------------------------------------------------------------------------------------------------------------------------------------------------------------------------------------------------------------------------------------------------------------------------------------------------------------------------------------------------------------------------------------------------------------------------------------------------------------------------------------------------------------------------------------------------------------------------------------------------------------------------------------------------------------------------------------------------------------------------------------------------------------------------------------------------------------------------------------------------------------------------------------------------------------------------------------------------------------------------------------------------------------------------------------------------------------------------------------------------------------------------------------------------------------------------------------------------------------------------------------------------------------------------------------------------------------------------------------------------------------------------------------------------------------------------------------------------------------------------------------------------------------------------------------------------------------------------------------------------------------------|



**Supplementary Table 3.** Primer sequences for cloning candidate dsDMR enhancers and negative controls.

| Enhancer                 | Genomic coordinate of PCR (Zv9) | Length | Forward PCR primer sequence     | Reverse PCR primer sequence     |
|--------------------------|---------------------------------|--------|---------------------------------|---------------------------------|
| <i>six3a-e1</i>          | chr13:9844735-9845567           | 833    | AACCGGATATCGTGGCTGCTCAAACATTA   | ACCGCTCGAGATGCATGTGCAGGCTTAGGT  |
| <i>six3a-e2</i>          | chr13:9876410-9877496           | 1087   | AACCGGATATCAGCAACCTCGGGCTAACAAT | TGCGAGCTCTTAAGCATGTGCAACGGAAG   |
| <i>six3b-e1</i>          | chr12:27023558-27024926         | 1369   | GGGGTACCGCACCTGTGCTTTCACCTCAA   | TGCGAGCTCACCATCCACACGTTACAGC    |
| <i>six3b-e2</i>          | chr12:27092089-27093577         | 1489   | GGGGTACCGCCATCTCTGAAAACATCA     | ACCGCTCGAGGACAACAGGTCATGTGTGG   |
| <i>fgfr2-e1</i>          | chr13:47043956-47044727         | 772    | ACCGCTCGAGCATTGCTATCTGTGGCTCA   | GGGGTACCGAGCGATGCTAAATCGACGTT   |
| <i>fgfr2-e2</i>          | chr13:47048850-47049553         | 704    | ACCGCTCGAGTGTGAAAAATTCCTGTCTGT  | GGGGTACCGCGCAGAGCTGTAGCTGTTT    |
| <i>fgfr2-e3</i>          | chr13:47079183-47079685         | 503    | ACCGCTCGAGTATCGCATCCTCACATGCAC  | GGGGTACCGCAGCTTGAACCTCCAGACT    |
| <i>fgfr2-e4</i>          | chr13:47147852-47148467         | 616    | ACCGCTCGAGTGGGCAACATTTGAAAAACA  | GGGGTACCACAAAAGTGGGTCCAACCTCG   |
| <i>fgf3-e1</i>           | chr7:54702356-54703124          | 769    | ACCGCTCGAGTCGCACATTCACCTGTAAGC  | GGGGTACCGTCTGGAACTGACGGCTCTC    |
| <i>znf703-e1</i>         | chr5:26039075-26040431          | 1357   | AACCGGATATCAATGCATGCCAATGATCAGA | GGGGTACCTTTTAAGAGTGCCGCTGACA    |
| <i>znf703-e2</i>         | chr5:26076625-26077977          | 1353   | AACCGGATATCTGGGTTTGAACAACAGAAA  | TGCGAGCTCACTTTTACCAACGCCATGC    |
| <i>znf703-e3</i>         | chr5:26081124-26081692          | 569    | AACCGGATATCAGGGCCGATTTCTCCACT   | TGCGAGCTCTTGAACAACAAAGCAACAGC   |
| <i>sox2-e1</i>           | chr22:40116018-40116916         | 899    | ACCGCTCGAGTCCGAGTACGGTGTCAATCAA | GGGGTACCGTACCTTAACCCCTGACA      |
| <i>sox2-e2</i>           | chr22:40267310-40268047         | 738    | ACCGCTCGAGCCCACAATACCAAAAAGTG   | GGGGTACCATGGGCTGTCTCTCTGA       |
| <i>sox2-e3</i>           | chr22:40270974-40271494         | 521    | ACCGCTCGAGTTAATTCAGCCGAACA      | GGGGTACCTGGGTTAGAATGCGGGTTAG    |
| <i>sox2-e4</i>           | chr22:40314986-40315852         | 867    | ACCGCTCGAGTGTAGCTCCGCCCTCTTTTA  | GGGGTACCGGCAGCTGAGTTGTGATGAA    |
| <i>sox2-e5</i>           | chr22:40382380-40383117         | 738    | ACCGCTCGAGCAGCTGGAAAAACAGACT    | GGGGTACCCACTACTGCCCTCTTT        |
| <i>wnt3-e1</i>           | chr12:23610508-23612061         | 1554   | ACCGCTCGAGACATGCTCCGCAAGGATAAC  | AACCGGATATCGGTTTCAAAGCGAGTTCTGC |
| <i>wnt3a-e1</i>          | chr2:3607794-3608622            | 829    | TGCGAGCTCTGACAATGCAATGGCAGACT   | GGGGTACCGAATTCCTCAGGGATACCA     |
| <i>wnt3a-e2</i>          | chr2:3615290-3616091            | 802    | AACCGGATATCAATGTTCAAACGGCATCTC  | ACCGCTCGAGCATTCTCTCCAGTGCCTTC   |
| <b>Negative controls</b> |                                 |        |                                 |                                 |
| <i>six3a-ne1</i>         | chr13:9843819-9844508           | 690    | CGCTAGGATCAACGAGAAGG            | AGAACGCCGATGAATAATGG            |
| <i>six3a-ne2</i>         | chr13:9876218-9876725           | 534    | GGCGGGGAAAATGTAGCTTA            | CTCATTTTCAACCGCATTCA            |
| <i>six3b-ne1</i>         | chr12:27025200-27025902         | 703    | TTCATTCGCTCATTTCATTTC           | CGATGATGACGACGACAAC             |
| <i>six3b-ne2</i>         | chr12:27089582-27090330         | 749    | GAGGCAGGGGGTAAGTTTTTC           | CAAAACGCTAACCAAGCAAA            |
| <i>fgfr2-ne1</i>         | chr13:47046087-47046773         | 687    | CAATGTCACTGCCCTTATG             | CTCGCTCATGCTTGACTTTC            |
| <i>fgfr2-ne2</i>         | chr13:47050151-47050861         | 711    | GCCGTTATCATATGCGTCAA            | GAGCTGGCAAATGTTGTGAA            |
| <i>fgfr2-ne3</i>         | chr13:47082761-47083356         | 596    | CAAGGTGTGCATGGCATAG             | AGCACCCGCTCAGCTGATAAT           |
| <i>fgfr2-ne4</i>         | chr13:47150488-47151093         | 606    | TCATCATTCATTGCCCTGA             | AACTGGTTTGGCCATGAGAC            |
| <i>fgf3-ne1</i>          | chr7:54671495-54672196          | 702    | GGACCAAAATGTCCGAATGA            | CTTTGGGGAGGGAAATGAAT            |
| <i>znf703-ne1</i>        | chr5:26034035-26034733          | 699    | GCTCACGCTCTTTCTGCTTT            | TTCATTTTGACAGCGAGGTG            |
| <i>znf703-ne2</i>        | chr5:26074122-26074815          | 694    | AATCTTGCTCCTCAGCATGG            | ATCTATGACCGGGGGTTTTTC           |
| <i>znf703-ne3</i>        | chr5:26083204-26083808          | 605    | CCTTTTGTCTCCGCTGTC              | TGTTTGTCTGGACTGGATTGA           |
| <i>sox2-ne1</i>          | chr22:40114980-40115687         | 708    | CCATTGACTAGTGGGAAAAACC          | TTGCAAGTGACGAATTTTGC            |
| <i>sox2-ne2</i>          | chr22:40246839-40247538         | 700    | AACATGCAAGCTCCACACAG            | CCCCTCCAACCTCACATCAG            |
| <i>sox2-ne3</i>          | chr22:40274332-40275071         | 740    | GCTTCAACCGTTGTTCTTGGT           | TGTGCATGGGAGCTGTAAT             |
| <i>sox2-ne4</i>          | chr22:40312238-40312908         | 671    | CAGCCTAACTGCAGACAGGA            | CCAACAATACCAATGGAAGTCA          |
| <i>sox2-ne5</i>          | chr22:40388661-40389359         | 699    | ATGCGGTCTCCAAATCAAAA            | GAAGAACCGTGCGGAATAAA            |
| <i>wnt3-ne1</i>          | chr12:23602504-23603203         | 700    | TATGCGGCTGTGGTATAAG             | ATGCTCACGTTTCAATTC              |
| <i>wnt3a-ne1</i>         | chr2:3607100-3607809            | 710    | GAATGCAAGGTGAAGCCAGAT           | TGCCATTGCATTGTCACTCT            |
| <i>wnt3a-ne2</i>         | chr2:3611694-3612386            | 693    | TTTATTGCAACCCATGCTCA            | CCCTATCCACGAGAGCAAAA            |

**Supplementary Table 4.** Overlaps of dsDMR enhancers or negative controls with conserved sequences and enhancer histone peaks.

| dsDMR enhancer or negative control | Location from TSS (kb) | Differentially methylated | Conserved sequences | H3K4me1 peak at 24hpf | H3K27ac peak at 24hpf |
|------------------------------------|------------------------|---------------------------|---------------------|-----------------------|-----------------------|
| <i>six3a-e1</i>                    | -18.6                  | ✓                         | ✓                   | ✓                     | ✓                     |
| <i>six3a-e2</i>                    | -50.4                  | ✓                         | ✓                   | ✓                     | ✓                     |
| <i>six3b-e1</i>                    | -104.2                 | ✓                         | ✓                   |                       |                       |
| <i>six3b-e2</i>                    | -35.6                  | ✓                         | ✓                   |                       |                       |
| <i>fgfr2-e1</i>                    | -3.7                   | ✓                         |                     | ✓                     | ✓                     |
| <i>fgfr2-e2</i>                    | -8.6                   | ✓                         |                     |                       |                       |
| <i>fgfr2-e3</i>                    | -38.8                  | ✓                         | ✓                   |                       |                       |
| <i>fgfr2-e4</i>                    | -107.5                 | ✓                         |                     | ✓                     |                       |
| <i>fgf3-e1</i>                     | -54.2                  | ✓                         | ✓                   |                       |                       |
| <i>znn703-e1</i>                   | -37.1                  | ✓                         | ✓                   | ✓                     | ✓                     |
| <i>znf703-e2</i>                   | -74.7                  | ✓                         | ✓                   | ✓                     | ✓                     |
| <i>znf703-e3</i>                   | -78.8                  | ✓                         | ✓                   | ✓                     | ✓                     |
| <i>sox2-e1</i>                     | 219.2                  | ✓                         | ✓                   | ✓                     | ✓                     |
| <i>sox2-e2</i>                     | 68.0                   | ✓                         |                     | ✓                     | ✓                     |
| <i>sox2-e3</i>                     | 64.5                   | ✓                         | ✓                   | ✓                     | ✓                     |
| <i>sox2-e4</i>                     | 20.3                   | ✓                         | ✓                   | ✓                     | ✓                     |
| <i>sox2-e5</i>                     | -47.1                  | ✓                         | ✓                   | ✓                     | ✓                     |
| <i>wnt3-e1</i>                     | -3.1                   | ✓                         | ✓                   | ✓                     | ✓                     |
| <i>wnt3a-e1</i>                    | 44.5                   | ✓                         | ✓                   | ✓                     |                       |
| <i>wnt3a-e2</i>                    | 37.0                   | ✓                         | ✓                   | ✓                     | ✓                     |
| <i>six3a-ne1</i>                   | -17.6                  |                           | ✓                   | ✓                     | ✓                     |
| <i>six3a-ne2</i>                   | -49.9                  |                           | ✓                   | ✓                     | ✓                     |
| <i>six3b-ne1</i>                   | -102.9                 |                           | ✓                   |                       |                       |
| <i>six3b-ne2</i>                   | -38.4                  |                           |                     |                       |                       |
| <i>fgfr2-ne1</i>                   | -5.8                   |                           |                     | ✓                     |                       |
| <i>fgfr2-ne2</i>                   | -9.9                   |                           |                     |                       |                       |
| <i>fgfr2-ne3</i>                   | -42.4                  |                           |                     |                       |                       |
| <i>fgfr2-ne4</i>                   | -110.2                 |                           |                     |                       |                       |
| <i>fgf3-ne1</i>                    | -23.4                  |                           | ✓                   |                       |                       |
| <i>znf703-ne1</i>                  | -31.8                  |                           | ✓                   | ✓                     | ✓                     |
| <i>znf703-ne2</i>                  | -71.8                  |                           |                     |                       |                       |
| <i>znf703-ne3</i>                  | -80.9                  |                           | ✓                   | ✓                     | ✓                     |
| <i>sox2-ne1</i>                    | 220.4                  |                           | ✓                   |                       | ✓                     |
| <i>sox2-ne2</i>                    | 88.5                   |                           | ✓                   |                       | ✓                     |
| <i>sox2-ne3</i>                    | 61.0                   |                           |                     |                       |                       |
| <i>sox2-ne4</i>                    | 23.1                   |                           |                     |                       |                       |
| <i>sox2-ne5</i>                    | -53.3                  |                           | ✓                   | ✓                     | ✓                     |
| <i>wnt3-ne1</i>                    | -11.5                  |                           |                     | ✓                     |                       |
| <i>wnt3a-ne1</i>                   | 45.2                   |                           |                     |                       |                       |
| <i>wnt3a-ne2</i>                   | 40.7                   |                           |                     |                       |                       |

**Supplementary Table 5.** The genes nearby candidate dsDMR enhancers and their ontology annotation.

| Gene nearby identified enhancers                        | Related enriched GO terms                           | Ontology Term ID |
|---------------------------------------------------------|-----------------------------------------------------|------------------|
| <i>six3a</i>                                            | brain development                                   | GO:0007420       |
|                                                         | central nervous system development                  | GO:0007417       |
| <i>six3b</i>                                            | brain development                                   | GO:0007420       |
|                                                         | central nervous system development                  | GO:0007417       |
|                                                         | eye development                                     | GO:0001654       |
|                                                         | sensory organ development                           | GO:0007423       |
|                                                         | camera-type eye development                         | GO:0043010       |
|                                                         | eye morphogenesis                                   | GO:0048592       |
|                                                         | camera-type eye morphogenesis                       | GO:0048593       |
| <i>fgfr2</i>                                            | embryonic eye morphogenesis                         | GO:0048048       |
|                                                         | positive regulation of cell proliferation           | GO:0008284       |
|                                                         | fibroblast growth factor receptor signaling pathway | GO:0008543       |
|                                                         | regulation of cell proliferation                    | GO:0042127       |
| <i>fgf3</i>                                             | fibroblast growth factor receptor activity          | GO:0005007       |
|                                                         | brain development                                   | GO:0007420       |
|                                                         | central nervous system development                  | GO:0007417       |
|                                                         | eye development                                     | GO:0001654       |
|                                                         | sensory organ development                           | GO:0007423       |
|                                                         | camera-type eye development                         | GO:0043010       |
|                                                         | hindbrain development                               | GO:0030902       |
|                                                         | dorsal/ventral pattern formation                    | GO:0009953       |
|                                                         | cell fate commitment                                | GO:0045165       |
|                                                         | cell fate specification                             | GO:0001708       |
|                                                         | peripheral nervous system development               | GO:0007422       |
|                                                         | regulation of neurogenesis                          | GO:0050767       |
|                                                         | regulation of nervous system development            | GO:0051960       |
|                                                         | regulation of cell development                      | GO:0060284       |
|                                                         | otic placode formation                              | GO:0043049       |
|                                                         | neuron fate specification                           | GO:0048665       |
|                                                         | pituitary gland development                         | GO:0021983       |
| adenohypophysis development                             | GO:0021984                                          |                  |
| neuron fate commitment                                  | GO:0048663                                          |                  |
| <i>znf703</i>                                           | brain development                                   | GO:0007420       |
|                                                         | central nervous system development                  | GO:0007417       |
|                                                         | eye development                                     | GO:0001654       |
|                                                         | sensory organ development                           | GO:0007423       |
|                                                         | camera-type eye development                         | GO:0043010       |
|                                                         | eye morphogenesis                                   | GO:0048592       |
|                                                         | hindbrain development                               | GO:0030902       |
|                                                         | camera-type eye morphogenesis                       | GO:0048593       |
| embryonic eye morphogenesis                             | GO:0048048                                          |                  |
| <i>sox2</i>                                             | eye development                                     | GO:0001654       |
|                                                         | sensory organ development                           | GO:0007423       |
|                                                         | eye morphogenesis                                   | GO:0048592       |
|                                                         | dorsal/ventral pattern formation                    | GO:0009953       |
|                                                         | regulation of transcription factor activity         | GO:0051090       |
|                                                         | regulation of DNA binding                           | GO:0051101       |
|                                                         | regulation of transcription regulator activity      | GO:0090046       |
|                                                         | regulation of binding                               | GO:0051098       |
|                                                         | positive regulation of DNA binding                  | GO:0043388       |
| positive regulation of binding                          | GO:0051099                                          |                  |
| positive regulation of transcription regulator activity | GO:0090047                                          |                  |
| positive regulation of transcription factor activity    | GO:0051091                                          |                  |
| <i>wnt3</i>                                             | Wnt receptor signaling pathway                      | GO:0016055       |
| <i>wnt3a</i>                                            | brain development                                   | GO:0007420       |
|                                                         | central nervous system development                  | GO:0007417       |
|                                                         | neural tube development                             | GO:0021915       |
|                                                         | chordate embryonic development                      | GO:0043009       |
|                                                         | embryo development ending in birth or egg hatching  | GO:0009792       |
|                                                         | dorsal/ventral pattern formation                    | GO:0009953       |
|                                                         | Wnt receptor signaling pathway                      | GO:0016055       |
|                                                         | neural tube patterning                              | GO:0021532       |
|                                                         | rostrocaudal neural tube patterning                 | GO:0021903       |
| midbrain-hindbrain boundary development                 | GO:0030917                                          |                  |
| tail morphogenesis                                      | GO:0035121                                          |                  |

**Supplementary Table 6.** Expression pattern at 24 hpf of genes nearby candidate dsDMR enhancers.

| Gene nearby identified enhancers | Gene expression pattern at 24 hpf | References                  | Reference PMID |
|----------------------------------|-----------------------------------|-----------------------------|----------------|
| <i>six3a</i>                     | forebrain                         | Feijoo et al., 2009         | 19544579       |
|                                  | midbrain hindbrain boundary       |                             |                |
|                                  | medial longitudinal fasciculus    | Bräutigam et al., 2010      | 20533356       |
|                                  | rhombomere 2                      |                             |                |
|                                  | anterior neural tube              | Pikulkaew et al., 2011      | 21360790       |
| <i>six3b</i>                     | central nervous system            |                             |                |
|                                  | diencephalon                      |                             |                |
|                                  | forebrain                         | Thisse et al., 2001-        | N.A.           |
|                                  | immature eye                      |                             |                |
|                                  | telencephalon                     |                             |                |
|                                  | immature eye                      | Perkins et al., 2005        | 15844196       |
|                                  | forebrain                         | Sun et al., 2006            | 16696945       |
|                                  | immature eye                      |                             |                |
|                                  | optic stalk                       | Loucks et al., 2007         | 17647295       |
|                                  | telencephalon                     |                             |                |
|                                  | immature eye                      |                             |                |
|                                  | optic stalk                       | Jeong et al., 2007          | 17164418       |
|                                  | forebrain                         |                             |                |
|                                  | optic cup                         | Sanek et al., 2009          | 19855021       |
| diencephalon                     |                                   |                             |                |
| telencephalon                    |                                   |                             |                |
| eye                              |                                   |                             |                |
| telencephalon                    | Xie et al., 2011                  | 21915332                    |                |
| <i>fgfr2</i>                     | diencephalon                      |                             |                |
|                                  | hindbrain                         |                             |                |
|                                  | midbrain                          |                             |                |
|                                  | midbrain hindbrain boundary       | Tonou-Fujimori et al., 2002 | 14516681       |
|                                  | solid lens vesicle                |                             |                |
|                                  | ventral telencephalon             |                             |                |
|                                  | epibranchial placode              | Nechiporuk et al., 2005     | 16077091       |
|                                  | pectoral fin bud                  | Harvey et al., 2006         | 16501170       |
|                                  | endoderm                          |                             |                |
|                                  | mesoderm                          | Manfroid et al., 2007       | 17942484       |
|                                  | pancreatic bud                    |                             |                |
|                                  | basal plate midbrain region       |                             |                |
|                                  | central nervous system            |                             |                |
|                                  | diencephalon                      |                             |                |
|                                  | forebrain                         |                             |                |
|                                  | hindbrain                         |                             |                |
|                                  | hypochord                         | Thisse et al., 2008-        | N.A.           |
|                                  | pharyngeal arch                   |                             |                |
|                                  | solid lens vesicle                |                             |                |
| tegmentum                        |                                   |                             |                |
| ventral mesenchyme               |                                   |                             |                |
| ventricular zone                 |                                   |                             |                |
| solid lens vesicle               | Nakayama et al., 2008             | 18089288                    |                |
| <i>fgf3</i>                      | forebrain                         |                             |                |
|                                  | midbrain                          |                             |                |
|                                  | pharyngeal arch 3-7 skeleton      | Kudoh et al., 2001-         | N.A.           |
|                                  | somite                            |                             |                |
|                                  | tail bud                          |                             |                |
|                                  | midbrain hindbrain boundary       |                             |                |
|                                  | otic vesicle                      |                             |                |
|                                  | pharyngeal pouch 1                | Walshe et al., 2003         | 14651935       |
|                                  | pharyngeal pouch 2                |                             |                |
|                                  | pharyngeal pouch 3                |                             |                |
|                                  | pharyngeal pouch                  | Jackman et al., 2004        | 15355794       |
|                                  | tooth 4V                          |                             |                |
|                                  | pharyngeal pouch                  | Nechiporuk et al., 2005     | 16077091       |
|                                  | diencephalon                      | Plaster et al., 2007        | 17576618       |
|                                  | midbrain hindbrain boundary       |                             |                |
|                                  | optic stalk                       | Nakayama et al., 2008       | 18089288       |
| presumptive neural retina        |                                   |                             |                |
| midbrain hindbrain boundary      | McMahon et al., 2009              | 19500562                    |                |
| anterior macula                  | Feng et al., 2010                 | 20043901                    |                |

Supplementary Table 6. Continued.

|                         |                              |                       |          |
|-------------------------|------------------------------|-----------------------|----------|
| <i>znf703</i>           | epidermis                    |                       |          |
|                         | hindbrain                    |                       |          |
|                         | mesoderm                     |                       |          |
|                         | midbrain                     |                       |          |
|                         | neural tube                  |                       |          |
|                         | periderm                     | Thisse et al., 2001-  | N.A.     |
|                         | pharyngeal arch 3-7 skeleton |                       |          |
| <i>znf703</i>           | somite                       |                       |          |
|                         | spinal cord                  |                       |          |
|                         | vein                         |                       |          |
|                         | optic cup                    | Brown et al., 2009    | 19171890 |
|                         | optic fissure                |                       |          |
| <i>znf703</i>           | periocular mesenchyme        | Lupo et al., 2011     | 21555593 |
|                         | immature eye                 |                       |          |
| <i>sox2</i>             | midbrain                     |                       |          |
|                         | midbrain hindbrain boundary  |                       |          |
|                         | neural tube                  | Thisse et al., 2001-  | N.A.     |
|                         | otic vesicle                 |                       |          |
|                         | spinal cord                  |                       |          |
|                         | telencephalon                |                       |          |
|                         | brain                        |                       |          |
|                         | diencephalon                 |                       |          |
|                         | forebrain                    |                       |          |
|                         | hindbrain                    |                       |          |
|                         | hypochord                    |                       |          |
|                         | immature eye                 |                       |          |
|                         | midbrain                     | Rauch et al., 2003-   | N.A.     |
|                         | nervous system               |                       |          |
|                         | otic vesicle                 |                       |          |
|                         | spinal cord                  |                       |          |
|                         | telencephalon                |                       |          |
|                         | ventral mesoderm             |                       |          |
|                         | cerebellum                   |                       |          |
|                         | otic vesicle                 | Okuda et al., 2006    | 16408288 |
|                         | presumptive neural retina    |                       |          |
| hindbrain               | Cunliffe et al., 2006        | 16324829              |          |
| otic vesicle            |                              |                       |          |
| lateral line primordium | Hernandez et al., 2007       | 17443814              |          |
| neuromast               |                              |                       |          |
| brain                   |                              |                       |          |
| central nervous system  | Dee et al., 2008             | 18572157              |          |
| brain                   |                              |                       |          |
| eye                     |                              |                       |          |
| otic vesicle            | Amaral et al., 2009          | 19767420              |          |
| posterior neural tube   |                              |                       |          |
| <i>wnt3</i>             | basal plate midbrain region  |                       |          |
|                         | cerebellum                   |                       |          |
|                         | diencephalon                 | Clements et al., 2009 | 19452545 |
|                         | hindbrain                    |                       |          |
|                         | midbrain                     |                       |          |
| <i>wnt3</i>             | zona limitans intrathalamica |                       |          |
|                         | midbrain hindbrain boundary  | Riley et al., 2004    | 15366005 |
| <i>wnt3a</i>            | rhombomere                   |                       |          |
|                         | cerebellum                   |                       |          |
|                         | diencephalon                 | Buckles et al., 2004  | 15147762 |
|                         | midbrain                     |                       |          |
|                         | pectoral fin bud             | Norton et al., 2005   | 16221725 |
|                         | optic tectum                 | Nyholm et al., 2007   | 17215296 |
|                         | neural crest cell            | Huang et al., 2009    | 19097504 |

**Supplementary Table 7.** Primer sequences for targeted validation.

| Genomic coordinate of PCR (Zv9)                                    | Length | CpGs | Forward PCR primer sequence<br>(genomic sequence in the parenthesis)                                                                                                 | Reverse PCR primer sequence<br>(genomic sequence in the parenthesis)                           |
|--------------------------------------------------------------------|--------|------|----------------------------------------------------------------------------------------------------------------------------------------------------------------------|------------------------------------------------------------------------------------------------|
| <b>Targeted bisulfite clonal sequencing</b>                        |        |      |                                                                                                                                                                      |                                                                                                |
| chr14:25157201-25157370                                            | 170    | 10   | AAATTTTATAAATCTTTTGGTAATATATTT<br>(AAACTTTATAACTGCTTTGGCAATACATTT)                                                                                                   | ATAACTAACATTCAMCAAMCATCAC<br>(ATGACTGGCATTCAACAGGCATCAC)                                       |
| chr22:12335157-12335326                                            | 170    | 15   | AATAATGATGTTAAGTTTTGAGGAGGT<br>(AATAATGATGCTAAGTCTCTGAGGAGGC)                                                                                                        | ACTCTAACTACAATACCCCTCAAC<br>(GCTCTAAGCTGCAAGTGCCTCAAC)                                         |
| chr14:20461146+20461441                                            | 296    | 18   | AGTTTTTTGTTATAGGGAATGTTGTT<br>(AGCTTTCGCTACAGGGAATGTTGTTG)                                                                                                           | TTCTACCAATATCATTAAAAAAC<br>(TTCTGCCAGTGCATTGAGGGAC)                                            |
| chr21:8582721+8582922                                              | 202    | 7    | AAATAAATTTTCTGTGGAAATTTAG<br>(AAATAAATCTCTGCTGTGGAAATTTAG)                                                                                                           | CACCCCTCTTTCTACACCTTACATAC<br>(CACCCCTCTTTCTGCAGCCTTGCATGC)                                    |
| chr5:46270017+46270196                                             | 180    | 4    | TTTGTATTTTAAAAAGTTTTTTTT<br>(CTGCACGCTAAAAAGTTTCCCTT)                                                                                                                | AATAATTTTAACTAACATTTATTTTATC<br>(GGTGATTTTAACTAACATTTGTTTGTG)                                  |
| chr5:46270498+46270621                                             | 124    | 4    | TATTGTGAGGTTTTATTGTTAGGAAAAA<br>(CAGTGTGAGGTTTTACTGTGAGAAAAA)                                                                                                        | AAAAAACAAAACACCAATAAACTACTAAC<br>(AAGAGAACAAAACACCAATGAGCTACTAAC)                              |
| <b>Targeted bisulfite pyrosequencing</b>                           |        |      |                                                                                                                                                                      |                                                                                                |
| Universal biotinylated primer: /5bp0aG/ <u>GCGACCCGCTGATCGTTTA</u> |        |      |                                                                                                                                                                      |                                                                                                |
| chr1:42015593-42015753                                             | 161    | 8    | AGTTTGTGTGTGTGTGTGATATTTTATTA<br>(AGCCNTGTGCTGTTTGCCTGACACTCCACTA)                                                                                                   | <u>GACGGGACCCGCTGATCGTTTA</u> ACACACCCCTATCCAAAAA<br>(ACACACCCCTGTTCCAAAGAGGAC)                |
|                                                                    |        |      | Sequencing primers:<br>TATTGTTAGTATTAGTATG<br>(TACTGTGATTTATCAGCATG)<br>TTATAATGATTTGATTAAA<br>(CCATAATGCATTTGATCAAA)                                                |                                                                                                |
| chr20:39657499-39657620                                            | 122    | 7    | TGCTTTTGTGGGAAATAATAGTT<br>(TGGCTCTGTTGGGAAATAACAGCC)                                                                                                                | <u>GACGGGACCCGCTGATCGTTTA</u> CCACACATCAAAATCTAAAAAACA<br>(CCACACATCAAAAGTCTGAGAGAACA)         |
|                                                                    |        |      | Sequencing primers:<br>ATAATAGTTTAAAGTAGAT<br>(ATAACAGCCCAAGGTAGAC)<br>GATTYAGTGTAGTGTGTG<br>(GATCCGAGCCGAGCTGCTGC)                                                  |                                                                                                |
| chr24:27012514-27012771                                            | 258    | 16   | TTGTTGATGTTTGTGTTTTAG<br>(CTGCNGATGCTTCTGTGCCCTCAG)                                                                                                                  | <u>GACGGGACCCGCTGATCGTTTA</u> ATCTCCCATTATAAATATTACTTTCATAT<br>(GTCTCCCATTGTAAATATTGCTTTCATGT) |
|                                                                    |        |      | Sequencing primers:<br>GTTTTTAGTAAATAGATTAGA<br>(GCCCTCAGTAACAGATTAGA)<br>GGCTTTGGAGGGAGTAG<br>(GGCTTCGGGAGGGAGCAG)<br>TATTTTATAGTAAAGTTATT<br>(CATCCACAGTAAAGCCATT) |                                                                                                |
